# Supplementary material for: TRPC3 is a major contributor to functional heterogeneity of cerebellar Purkinje cells
Source: eLife journal article supplement (doi:10.7554/elife.45590), 2019-09-05
Supplement: supp [file elife-45590-supp-v1.zip]

Archive with 19 entries (19 files):
- elife_poa_e45590_Figure_4_source_data_1.xlsx
- elife_poa_e45590_Figure_5_source_data_1.xlsx
- elife_poa_e45590_Figure_1_video_1.mp4
- elife_poa_e45590_Figure_6_source_data_1.xlsx
- elife_poa_e45590_Figure_1_figure_supplement_3.tif
- elife_poa_e45590_Figure_4_figure_supplement_1.tif
- elife_poa_e45590_Figure_3_source_data_1.xlsx
- elife_poa_e45590_Figure_6_figure_supplement_2.tif
- elife_poa_e45590_Transparent_Reporting_File.pdf
- elife_poa_e45590_Figure_1_figure_supplement_1.tif
- elife_poa_e45590_Figure_7_figure_supplement_1.tif
- elife_poa_e45590_Figure_2_source_data_1.xlsx
- elife_poa_e45590_Figure_6_figure_supplement_1.tif
- elife_poa_e45590_Figure_2_figure_supplement_1.tif
- elife_poa_e45590_Figure_5_figure_supplement_1.tif
- elife_poa_e45590_Figure_3_figure_supplement_1.tif
- elife_poa_e45590_Figure_1_figure_supplement_2.tif
- elife_poa_e45590_Supplementary_file_1.docx
- elife_poa_e45590_Figure_7_source_data_1.xlsx
