# Supplementary material for: TRPC3 is a major contributor to functional heterogeneity of cerebellar Purkinje cells
Source: eLife journal article supplement (doi:10.7554/elife.45590), 2019-09-05
Supplement: supp [file elife-45590-supp-v1.zip › elife_poa_e45590_Figure_2_source_data_1.xlsx]

## Sheet: Cell-attached
	Spontaneous firing activity of PCs in cell-attached mode fromTRPC3Mwk/- mice and pcp2Cre;TRPC3fl/fl mice
	Cell-attached
	Mouse line	Genetype	Location	Mouse nr.	PC nr.	Spike rate (Hz)	CV	CV2_mean
	TRPC3Mwk/-	WT	Lobules I-III	1	1	65.4	0.245174	0.214336
	TRPC3Mwk/-	WT	Lobules I-III	1	2	82.2667	0.0948597	0.092258
	TRPC3Mwk/-	WT	Lobules I-III	2	3	63.5167	0.170886	0.194102
	TRPC3Mwk/-	WT	Lobules I-III	2	4	57.075	0.133089	0.119809
	TRPC3Mwk/-	WT	Lobules I-III	2	5	32.3083	0.0933618	0.0929821
	TRPC3Mwk/-	WT	Lobules I-III	2	6	37.4417	0.150878	0.121596
	TRPC3Mwk/-	WT	Lobules I-III	2	7	60.3667	0.121155	0.0896875
	TRPC3Mwk/-	WT	Lobules I-III	2	8	67.5	0.0693732	0.0855605
	TRPC3Mwk/-	WT	Lobules I-III	2	9	60.15	0.155809	0.15663
	TRPC3Mwk/-	WT	Lobules I-III	2	10	61.6034	0.0764698	0.112741
	TRPC3Mwk/-	WT	Lobules I-III	2	11	68.2833	0.0820298	0.0929292
	TRPC3Mwk/-	WT	Lobules I-III	3	12	103.842	0.0488068	0.0387957
	TRPC3Mwk/-	WT	Lobules I-III	3	13	31.3	0.205893	0.23407
	TRPC3Mwk/-	WT	Lobules I-III	4	14	42.2	0.225747	0.27888
	TRPC3Mwk/-	WT	Lobules I-III	4	15	42.09	0.11962	0.0616635
	TRPC3Mwk/-	WT	Lobule X	1	1	23.2417	0.15959	0.0793808
	TRPC3Mwk/-	WT	Lobule X	1	2	30.1083	0.0996274	0.050093
	TRPC3Mwk/-	WT	Lobule X	1	3	55.2083	0.0577934	0.080126
	TRPC3Mwk/-	WT	Lobule X	1	4	62.2417	0.0706797	0.0465826
	TRPC3Mwk/-	WT	Lobule X	2	5	28.35	0.19818	0.124216
	TRPC3Mwk/-	WT	Lobule X	2	6	21.0417	0.116294	0.0749555
	TRPC3Mwk/-	WT	Lobule X	2	7	22.67	0.142462	0.114573
	TRPC3Mwk/-	WT	Lobule X	2	8	30.69	0.0782691	0.0500466
	TRPC3Mwk/-	WT	Lobule X	2	9	57.43	0.0662041	1.05005
	TRPC3Mwk/-	WT	Lobule X	2	10	50.66	0.082549	0.0337586
	TRPC3Mwk/-	WT	Lobule X	3	11	83.2185	0.1926	0.209786
	TRPC3Mwk/-	WT	Lobule X	4	12	11.58	0.258209	0.0940773
	TRPC3Mwk/-	MUT	Lobules I-III	1	1	87.125	0.16269	0.0773756
	TRPC3Mwk/-	MUT	Lobules I-III	2	2	161.353	0.0808932	0.0540504
	TRPC3Mwk/-	MUT	Lobules I-III	2	3	92.22	0.0873282	0.0833607
	TRPC3Mwk/-	MUT	Lobules I-III	3	4	49.625	0.138874	0.176607
	TRPC3Mwk/-	MUT	Lobules I-III	3	5	82.9417	0.124129	0.137707
	TRPC3Mwk/-	MUT	Lobules I-III	3	6	69.8917	0.138933	0.162914
	TRPC3Mwk/-	MUT	Lobules I-III	3	7	47.2917	0.0849823	0.0848257
	TRPC3Mwk/-	MUT	Lobules I-III	3	8	150.85	0.146263	0.0830118
	TRPC3Mwk/-	MUT	Lobules I-III	3	9	61.3667	0.13493	0.101249
	TRPC3Mwk/-	MUT	Lobules I-III	3	10	46.7167	0.104736	0.0881355
	TRPC3Mwk/-	MUT	Lobules I-III	4	11	119.076	0.113547	0.120067
	TRPC3Mwk/-	MUT	Lobules I-III	4	12	71.0168	0.090748	0.0796596
	TRPC3Mwk/-	MUT	Lobules I-III	4	13	44.3361	0.075575	0.0522727
	TRPC3Mwk/-	MUT	Lobules I-III	4	14	97.1	0.198618	0.127189
	TRPC3Mwk/-	MUT	Lobules I-III	4	15	87.1333	0.129956	0.126534
	TRPC3Mwk/-	MUT	Lobule X	1	1	65.1917	0.0606108	0.036089
	TRPC3Mwk/-	MUT	Lobule X	1	2	31.4917	0.0711039	0.0477433
	TRPC3Mwk/-	MUT	Lobule X	1	3	42.7067	0.0789163	0.0545382
	TRPC3Mwk/-	MUT	Lobule X	1	4	42.7227	0.0613171	0.0289983
	TRPC3Mwk/-	MUT	Lobule X	2	5	34.95	0.0857516	0.0499484
	TRPC3Mwk/-	MUT	Lobule X	2	6	55.425	0.0568815	0.0330579
	TRPC3Mwk/-	MUT	Lobule X	3	7	41.325	0.0749848	0.058437
	TRPC3Mwk/-	MUT	Lobule X	3	8	33.975	0.0788058	0.0513386
	TRPC3Mwk/-	MUT	Lobule X	3	9	19.4583	0.105684	0.0708163
	TRPC3Mwk/-	MUT	Lobule X	3	10	29.4286	0.0749607	0.0625615
	TRPC3Mwk/-	MUT	Lobule X	4	11	21.084	0.13748	0.096697
	TRPC3Mwk/-	MUT	Lobule X	4	12	24.5882	0.188963	0.0997936
	TRPC3Mwk/-	MUT	Lobule X	4	13	34.65	0.0962005	0.0673784
	pcp2Cre;TRPC3fl/fl	WT	Lobules I-III	1	1	104.333	0.1248	0.085
	pcp2Cre;TRPC3fl/fl	WT	Lobules I-III	1	2	44.6765	0.0693	0.0565
	pcp2Cre;TRPC3fl/fl	WT	Lobules I-III	1	3	52.7519	0.1211	0.0719
	pcp2Cre;TRPC3fl/fl	WT	Lobules I-III	1	4	53.6667	0.1136	0.1357
	pcp2Cre;TRPC3fl/fl	WT	Lobules I-III	1	5	71.0583	0.0685	0.0849
	pcp2Cre;TRPC3fl/fl	WT	Lobules I-III	1	6	56.45	0.1111	0.1024
	pcp2Cre;TRPC3fl/fl	WT	Lobules I-III	1	7	18.9167	0.0547	0.0329
	pcp2Cre;TRPC3fl/fl	WT	Lobules I-III	1	8	53.9833	0.0954	0.1194
	pcp2Cre;TRPC3fl/fl	WT	Lobules I-III	1	9	75.9091	0.0498	0.0521
	pcp2Cre;TRPC3fl/fl	WT	Lobules I-III	1	10	83	0.062	0.0623
	pcp2Cre;TRPC3fl/fl	WT	Lobules I-III	1	11	62.0333	0.0349	0.0379
	pcp2Cre;TRPC3fl/fl	WT	Lobules I-III	1	12	52.642	0.1386	0.0754
	pcp2Cre;TRPC3fl/fl	WT	Lobules I-III	2	13	45.6583	0.0887	0.1109
	pcp2Cre;TRPC3fl/fl	WT	Lobules I-III	2	14	43.8333	0.141	0.1035
	pcp2Cre;TRPC3fl/fl	WT	Lobules I-III	2	15	56.8667	0.1856	0.2294
	pcp2Cre;TRPC3fl/fl	WT	Lobules I-III	2	16	33.5857	0.0712	0.0854
	pcp2Cre;TRPC3fl/fl	WT	Lobules I-III	2	17	52.025	0.0916	0.1159
	pcp2Cre;TRPC3fl/fl	WT	Lobules I-III	2	18	24.9917	0.0911	0.119
	pcp2Cre;TRPC3fl/fl	WT	Lobules I-III	2	19	31.05	0.042	0.0427
	pcp2Cre;TRPC3fl/fl	WT	Lobules I-III	2	20	34.3083	0.0335	0.0358
	pcp2Cre;TRPC3fl/fl	WT	Lobules I-III	2	21	27.35	0.0759	0.0422
	pcp2Cre;TRPC3fl/fl	WT	Lobules I-III	2	22	50	0.062	0.05
	pcp2Cre;TRPC3fl/fl	WT	Lobules I-III	2	23	16.4	0.0796	0.0707
	pcp2Cre;TRPC3fl/fl	WT	Lobules I-III	3	24	115.017	0.0817	0.0639
	pcp2Cre;TRPC3fl/fl	WT	Lobules I-III	3	25	45.9167	0.0847	0.0904
	pcp2Cre;TRPC3fl/fl	WT	Lobules I-III	3	26	58.8333	0.107	0.1355
	pcp2Cre;TRPC3fl/fl	WT	Lobules I-III	3	27	51.65	0.0896	0.1109
	pcp2Cre;TRPC3fl/fl	WT	Lobules I-III	3	28	96.3375	0.0704	0.0786
	pcp2Cre;TRPC3fl/fl	WT	Lobules I-III	3	29	44.8	0.0422	0.0511
	pcp2Cre;TRPC3fl/fl	WT	Lobules I-III	3	30	55.7571	0.0526	0.0601
	pcp2Cre;TRPC3fl/fl	WT	Lobules I-III	3	31	64.5778	0.061	0.0803
	pcp2Cre;TRPC3fl/fl	WT	Lobules I-III	3	32	59.3667	0.0782	0.0661
	pcp2Cre;TRPC3fl/fl	WT	Lobules I-III	4	33	39.225	0.1152	0.0563
	pcp2Cre;TRPC3fl/fl	WT	Lobules I-III	4	34	23.8917	0.0574	0.0597
	pcp2Cre;TRPC3fl/fl	WT	Lobules I-III	4	35	53.7583	0.0755	0.0884
	pcp2Cre;TRPC3fl/fl	WT	Lobules I-III	4	36	66.5525	0.0783	0.0903
	pcp2Cre;TRPC3fl/fl	WT	Lobules I-III	4	37	94.275	0.0807356	0.0804765
	pcp2Cre;TRPC3fl/fl	WT	Lobules I-III	5	38	47.7083	0.065	0.0699
	pcp2Cre;TRPC3fl/fl	WT	Lobules I-III	5	39	57.7583	0.1112	0.0956
	pcp2Cre;TRPC3fl/fl	WT	Lobules I-III	5	40	53.825	0.0496	0.0504
	pcp2Cre;TRPC3fl/fl	WT	Lobules I-III	5	41	65.7286	0.0526	0.0696
	pcp2Cre;TRPC3fl/fl	WT	Lobules I-III	5	42	54.5143	0.0491	0.063
	pcp2Cre;TRPC3fl/fl	WT	Lobules I-III	5	43	86	0.0636	0.0776
	pcp2Cre;TRPC3fl/fl	WT	Lobule X	1	1	59.1417	0.0575	0.0502
	pcp2Cre;TRPC3fl/fl	WT	Lobule X	1	2	16.0583	0.0376	0.0272
	pcp2Cre;TRPC3fl/fl	WT	Lobule X	1	3	40.5	0.0541	0.0553
	pcp2Cre;TRPC3fl/fl	WT	Lobule X	1	4	39.3778	0.0703	0.0431
	pcp2Cre;TRPC3fl/fl	WT	Lobule X	1	5	48.1364	0.039	0.0286
	pcp2Cre;TRPC3fl/fl	WT	Lobule X	1	6	23.0833	0.0196	0.0201
	pcp2Cre;TRPC3fl/fl	WT	Lobule X	1	7	27.2059	0.1063	0.0718
	pcp2Cre;TRPC3fl/fl	WT	Lobule X	1	8	37.4917	0.0791	0.0385
	pcp2Cre;TRPC3fl/fl	WT	Lobule X	2	9	19.825	0.0778	0.0406
	pcp2Cre;TRPC3fl/fl	WT	Lobule X	2	10	45.6	0.0371	0.0377
	pcp2Cre;TRPC3fl/fl	WT	Lobule X	2	11	43.6333	0.0309	0.0324
	pcp2Cre;TRPC3fl/fl	WT	Lobule X	2	12	20.2833	0.078	0.0343
	pcp2Cre;TRPC3fl/fl	WT	Lobule X	2	13	48.4364	0.0418	0.0399
	pcp2Cre;TRPC3fl/fl	WT	Lobule X	2	14	35.05	0.0363	0.0236
	pcp2Cre;TRPC3fl/fl	WT	Lobule X	3	15	26.2875	0.0449	0.0422
	pcp2Cre;TRPC3fl/fl	WT	Lobule X	3	16	26.4333	0.0325	0.0215
	pcp2Cre;TRPC3fl/fl	WT	Lobule X	3	17	17.325	0.0387	0.0334
	pcp2Cre;TRPC3fl/fl	WT	Lobule X	3	18	19.8333	0.0406	0.0383
	pcp2Cre;TRPC3fl/fl	WT	Lobule X	3	19	29.5167	0.0351	0.0382
	pcp2Cre;TRPC3fl/fl	WT	Lobule X	3	20	19.7083	0.0367	0.0293
	pcp2Cre;TRPC3fl/fl	WT	Lobule X	3	21	27.15	0.0343	0.0357
	pcp2Cre;TRPC3fl/fl	WT	Lobule X	3	22	27.5417	0.06	0.0297
	pcp2Cre;TRPC3fl/fl	WT	Lobule X	3	23	29.5	0.0484	0.0342
	pcp2Cre;TRPC3fl/fl	WT	Lobule X	3	24	45.9583	0.0612	0.0411
	pcp2Cre;TRPC3fl/fl	WT	Lobule X	3	25	41.5833	0.0211	0.0243
	pcp2Cre;TRPC3fl/fl	WT	Lobule X	3	26	51.4125	0.0399	0.0417
	pcp2Cre;TRPC3fl/fl	WT	Lobule X	3	27	34.9917	0.0224	0.0253
	pcp2Cre;TRPC3fl/fl	WT	Lobule X	4	28	20.9583	0.0664	0.0388
	pcp2Cre;TRPC3fl/fl	WT	Lobule X	4	29	17.2917	0.0314	0.0229
	pcp2Cre;TRPC3fl/fl	WT	Lobule X	4	30	34.3083	0.0573	0.0374
	pcp2Cre;TRPC3fl/fl	WT	Lobule X	4	31	23.75	0.0627	0.0414
	pcp2Cre;TRPC3fl/fl	WT	Lobule X	4	32	16.7333	0.0412	0.0413
	pcp2Cre;TRPC3fl/fl	WT	Lobule X	4	33	17.525	0.0621	0.0447
	pcp2Cre;TRPC3fl/fl	WT	Lobule X	4	34	25.3	0.0483	0.0411
	pcp2Cre;TRPC3fl/fl	WT	Lobule X	4	35	20.2444	0.0859	0.0662
	pcp2Cre;TRPC3fl/fl	MUT	Lobules I-III	1	1	30.8769	0.0574	0.067
	pcp2Cre;TRPC3fl/fl	MUT	Lobules I-III	1	2	27.1	0.0636	0.06
	pcp2Cre;TRPC3fl/fl	MUT	Lobules I-III	1	3	25.5167	0.0581	0.0519
	pcp2Cre;TRPC3fl/fl	MUT	Lobules I-III	1	4	31.6905	0.0669	0.0638
	pcp2Cre;TRPC3fl/fl	MUT	Lobules I-III	1	5	22.1111	0.0542	0.0611
	pcp2Cre;TRPC3fl/fl	MUT	Lobules I-III	1	6	40.34	0.0655	0.0557
	pcp2Cre;TRPC3fl/fl	MUT	Lobules I-III	2	7	87.6167	0.0685	0.0522
	pcp2Cre;TRPC3fl/fl	MUT	Lobules I-III	2	8	62.7419	0.0863	0.0724
	pcp2Cre;TRPC3fl/fl	MUT	Lobules I-III	2	9	40.625	0.0432	0.039
	pcp2Cre;TRPC3fl/fl	MUT	Lobules I-III	2	10	57.2679	0.0344	0.0408
	pcp2Cre;TRPC3fl/fl	MUT	Lobules I-III	2	11	34.575	0.0922	0.0391
	pcp2Cre;TRPC3fl/fl	MUT	Lobules I-III	2	12	53.5583	0.0948	0.0454
	pcp2Cre;TRPC3fl/fl	MUT	Lobules I-III	2	13	31.5375	0.0502	0.0404
	pcp2Cre;TRPC3fl/fl	MUT	Lobules I-III	2	14	65.3667	0.0549	0.0474
	pcp2Cre;TRPC3fl/fl	MUT	Lobules I-III	2	15	34.5714	0.0788	0.0663
	pcp2Cre;TRPC3fl/fl	MUT	Lobules I-III	3	16	59.35	0.0469	0.054
	pcp2Cre;TRPC3fl/fl	MUT	Lobules I-III	3	17	60.4917	0.051	0.0623
	pcp2Cre;TRPC3fl/fl	MUT	Lobules I-III	3	18	50.9238	0.0418	0.0499
	pcp2Cre;TRPC3fl/fl	MUT	Lobules I-III	3	19	44.4	0.109	0.0461
	pcp2Cre;TRPC3fl/fl	MUT	Lobules I-III	3	20	10.6	0.1788	0.1712
	pcp2Cre;TRPC3fl/fl	MUT	Lobules I-III	3	21	58.5	0.0456	0.0484
	pcp2Cre;TRPC3fl/fl	MUT	Lobules I-III	3	22	45.7846	0.1207	0.1639
	pcp2Cre;TRPC3fl/fl	MUT	Lobules I-III	3	23	62.5417	0.0729	0.0767
	pcp2Cre;TRPC3fl/fl	MUT	Lobules I-III	3	24	49.175	0.0467	0.0581
	pcp2Cre;TRPC3fl/fl	MUT	Lobules I-III	4	25	51.7857	0.0665	0.0773
	pcp2Cre;TRPC3fl/fl	MUT	Lobules I-III	4	26	54.85	0.0442	0.0484
	pcp2Cre;TRPC3fl/fl	MUT	Lobules I-III	4	27	36.1083	0.0584	0.0705
	pcp2Cre;TRPC3fl/fl	MUT	Lobules I-III	4	28	23.1833	0.0478	0.0529
	pcp2Cre;TRPC3fl/fl	MUT	Lobules I-III	4	29	44.2941	0.0383	0.0313
	pcp2Cre;TRPC3fl/fl	MUT	Lobules I-III	4	30	36.3833	0.0409	0.0487
	pcp2Cre;TRPC3fl/fl	MUT	Lobules I-III	4	31	58.7583	0.0974	0.1026
	pcp2Cre;TRPC3fl/fl	MUT	Lobules I-III	4	32	36.4333	0.0497	0.0608
	pcp2Cre;TRPC3fl/fl	MUT	Lobules I-III	4	33	44.25	0.0351	0.0426
	pcp2Cre;TRPC3fl/fl	MUT	Lobules I-III	4	34	32.1917	0.1024	0.051
	pcp2Cre;TRPC3fl/fl	MUT	Lobules I-III	4	35	34.8917	0.0614	0.0586
	pcp2Cre;TRPC3fl/fl	MUT	Lobules I-III	4	36	36.9917	0.0284	0.0341
	pcp2Cre;TRPC3fl/fl	MUT	Lobules I-III	4	37	38.3	0.0964	0.0624
	pcp2Cre;TRPC3fl/fl	MUT	Lobules I-III	4	38	41.1143	0.07	0.0676
	pcp2Cre;TRPC3fl/fl	MUT	Lobules I-III	5	39	75.825	0.0616	0.0815
	pcp2Cre;TRPC3fl/fl	MUT	Lobules I-III	6	40	32.7917	0.0661769	0.0621385
	pcp2Cre;TRPC3fl/fl	MUT	Lobule X	1	1	19.5583	0.0379	0.0259
	pcp2Cre;TRPC3fl/fl	MUT	Lobule X	1	2	17.3333	0.0301	0.0183
	pcp2Cre;TRPC3fl/fl	MUT	Lobule X	1	3	31.3	0.0532	0.0346
	pcp2Cre;TRPC3fl/fl	MUT	Lobule X	1	4	16.3667	0.0517	0.0408
	pcp2Cre;TRPC3fl/fl	MUT	Lobule X	1	5	21.1897	0.0332	0.0297
	pcp2Cre;TRPC3fl/fl	MUT	Lobule X	1	6	24.5667	0.0334	0.0232
	pcp2Cre;TRPC3fl/fl	MUT	Lobule X	1	7	17.1857	0.1042	0.0438
	pcp2Cre;TRPC3fl/fl	MUT	Lobule X	1	8	17.2333	0.044	0.0215
	pcp2Cre;TRPC3fl/fl	MUT	Lobule X	1	9	25.8462	0.0293	0.0337
	pcp2Cre;TRPC3fl/fl	MUT	Lobule X	1	10	24.4167	0.0397	0.0291
	pcp2Cre;TRPC3fl/fl	MUT	Lobule X	2	11	37.3167	0.0469	0.0305
	pcp2Cre;TRPC3fl/fl	MUT	Lobule X	2	12	33.5583	0.0287	0.0198
	pcp2Cre;TRPC3fl/fl	MUT	Lobule X	2	13	16.94	0.0484	0.0428
	pcp2Cre;TRPC3fl/fl	MUT	Lobule X	2	14	27.6571	0.0484	0.0325
	pcp2Cre;TRPC3fl/fl	MUT	Lobule X	3	15	34.0222	0.032	0.0239
	pcp2Cre;TRPC3fl/fl	MUT	Lobule X	3	16	29.8	0.0521	0.0342
	pcp2Cre;TRPC3fl/fl	MUT	Lobule X	3	17	19.7304	0.039	0.0318
	pcp2Cre;TRPC3fl/fl	MUT	Lobule X	3	18	16.0917	0.0335	0.0273
	pcp2Cre;TRPC3fl/fl	MUT	Lobule X	3	19	36.01	0.0296	0.0324
	pcp2Cre;TRPC3fl/fl	MUT	Lobule X	3	20	25.087	0.073	0.0384
	pcp2Cre;TRPC3fl/fl	MUT	Lobule X	4	21	36.1	0.0495	0.0279
	pcp2Cre;TRPC3fl/fl	MUT	Lobule X	4	22	35.5714	0.0313	0.0357
	pcp2Cre;TRPC3fl/fl	MUT	Lobule X	4	23	33.775	0.0194	0.0201
	pcp2Cre;TRPC3fl/fl	MUT	Lobule X	4	24	33.6	0.0203	0.0181
	pcp2Cre;TRPC3fl/fl	MUT	Lobule X	4	25	30.725	0.0262	0.0205
	pcp2Cre;TRPC3fl/fl	MUT	Lobule X	4	26	20.5571	0.02	0.0176
	pcp2Cre;TRPC3fl/fl	MUT	Lobule X	4	27	26.8583	0.036	0.04
	pcp2Cre;TRPC3fl/fl	MUT	Lobule X	5	28	22.9	0.0292	0.027
	pcp2Cre;TRPC3fl/fl	MUT	Lobule X	6	29	45.4833	0.0782545	0.0667842
	pcp2Cre;TRPC3fl/fl	MUT	Lobule X	6	30	54.575	0.0796318	0.0737255
	pcp2Cre;TRPC3fl/fl	MUT	Lobule X	7	31	18.2	0.118471	0.0829083
	pcp2Cre;TRPC3fl/fl	MUT	Lobule X	7	32	27.025	0.0907696	0.0599943
	pcp2Cre;TRPC3fl/fl	MUT	Lobule X	8	33	31.425	0.0909795	0.0533938
	pcp2Cre;TRPC3fl/fl	MUT	Lobule X	8	34	26.825	0.0985122	0.0690459
	pcp2Cre;TRPC3fl/fl	MUT	Lobule X	8	35	26.4417	0.098193	0.0655701
	pcp2Cre;TRPC3fl/fl	MUT	Lobule X	9	36	25.8583	0.124677	0.062775
	pcp2Cre;TRPC3fl/fl	MUT	Lobule X	9	37	35.9412	0.0916363	0.0886667
	pcp2Cre;TRPC3fl/fl	MUT	Lobule X	9	38	49.675	0.0543608	0.0407678
	pcp2Cre;TRPC3fl/fl	MUT	Lobule X	10	39	43.2	0.0637685	0.0583843
	pcp2Cre;TRPC3fl/fl	MUT	Lobule X	10	40	35.05	0.0781322	0.0552986
	pcp2Cre;TRPC3fl/fl	MUT	Lobule X	10	41	16.6	0.127546	0.0867006
	Mouse line	Genetype	Location	Average		Spike rate (Hz)	CV	CV2_mean
	average over cells
	TRPC3Mwk/-	WT	Lobules I-III	mean		58.3562	0.132877	0.132403
				sd		19.4423	0.0591904	0.0686967
			Lobule X	mean		39.7033	0.126871	0.0827602
				sd		21.4873	0.0637886	0.0496824
		MUT	Lobules I-III	mean		84.5362	0.120813	0.103664
				sd		36.1649	0.0345003	0.0369808
			Lobule X	mean		36.6921	0.0901277	0.0582614
				sd		13.0341	0.0367315	0.021768
	pcp2Cre;TRPC3fl/fl	WT	Lobules I-III	mean		55.3717	0.0807357	0.0804669
				sd		21.7739	0.0316906	0.0351691
			Lobule X	mean		30.7764	0.0496143	0.0374857
				sd		11.7412	0.0199293	0.0113044
		MUT	Lobules I-III	mean		44.1354	0.0661769	0.0621385
				sd		15.5893	0.0286602	0.0282321
			Lobule X	mean		28.4821	0.0561532	0.041017
				sd		9.29633	0.0305162	0.0198864
	average per mouse, averaged over mice
	TRPC3Mwk/-	WT	Lobules I-III	mean		60.0052	0.146764	0.144613
				sd		13.9036	0.0287227	0.0222507
			Lobule X	mean		44.7812	0.160209	0.151016
				sd		29.9561	0.0813934	0.0881667
		MUT	Lobules I-III	mean		92.5782	0.123295	0.0916081
				sd		23.626	0.0321034	0.0229473
			Lobule X	mean		37.1341	0.0909484	0.0580225
				sd		9.6558	0.0339597	0.0218965
	pcp2Cre;TRPC3fl/fl	WT	Lobules I-III	mean		56.1757	0.0790444	0.0791411
				sd		10.8823	0.00943094	0.0078828
			Lobule X	mean		31.1042	0.0512109	0.0379447
				sd		6.57724	0.00839817	0.004469
		MUT	Lobules I-III	mean		46.6622	0.0658009	0.0652878
				sd		16.7556	0.00721712	0.013181
			Lobule X	mean		30.0732	0.0649626	0.0480734
				sd		8.48513	0.0295898	0.0202357

## Sheet: Current injection
	Whole-cell patch-clamp recordings in slice from PCs of pcp2Cre;TRPC3fl/fl mice by injection of brief (1s) depolarizing
	current pulses (ranging from -100 to 1100pA with 100pA increments) from a membrane holding potential of –65 mV at 33.0±1.0°C.
	Current injection
	Mouse line	Genetype	Location	Mouse nr.	PC nr.	Holding current (pA)	Slope	Peak (mV)	HW (ms)	AHP (mV)
	pcp2Cre;TRPC3fl/fl	WT	Lobules I-III	1	1	500	0.1869	57.5317	0.224898	4.7791
	pcp2Cre;TRPC3fl/fl	WT	Lobules I-III	1	2	490	0.1473	45.8801	0.242716	4.6875
	pcp2Cre;TRPC3fl/fl	WT	Lobules I-III	2	3	325	0.1577	38.4552	0.328703	5.1575
	pcp2Cre;TRPC3fl/fl	WT	Lobules I-III	2	4	380	0.1507	52.3865	0.288141	5.8777
	pcp2Cre;TRPC3fl/fl	WT	Lobules I-III	2	5	375	0.1607	48.8342	0.284068	5.4444
	pcp2Cre;TRPC3fl/fl	WT	Lobules I-III	3	6	450	0.1888	34.6284	0.252411	3.63503
	pcp2Cre;TRPC3fl/fl	WT	Lobules I-III	3	7	387	0.1371	31.8887	0.236201	3.46395
	pcp2Cre;TRPC3fl/fl	WT	Lobules I-III	4	8	345	0.2003	42.2036	0.244805	8.26429
	pcp2Cre;TRPC3fl/fl	WT	Lobules I-III	4	9	460	0.1893	47.1078	0.241353	2.84314
	pcp2Cre;TRPC3fl/fl	WT	Lobules I-III	4	10	332	0.2105	49.5821	0.24232	6.70557
	pcp2Cre;TRPC3fl/fl	WT	Lobules I-III	4	11	564	0.189	45.9101	0.210619	4.80783
	pcp2Cre;TRPC3fl/fl	WT	Lobules I-III	5	12	274	0.2267	76.4297	0.141248	2.9685
	pcp2Cre;TRPC3fl/fl	WT	Lobules I-III	5	13	335	0.1795	89.5221	0.11763	2.4372
	pcp2Cre;TRPC3fl/fl	WT	Lobules I-III	5	14	246	0.1555	76.461	0.128534	3.2497
	pcp2Cre;TRPC3fl/fl	WT	Lobules I-III	5	15	532	0.29	55.6662	0.151946	3.2497
	pcp2Cre;TRPC3fl/fl	WT	Lobules I-III	6	16	409	0.2037	86.1613	0.0941655	4.38123
	pcp2Cre;TRPC3fl/fl	WT	Lobules I-III	6	17	496	0.2894	69.2234	0.108513	2.2855
	pcp2Cre;TRPC3fl/fl	WT	Lobule X	1	1	330	0.072	49.585	0.354272	10.4553
	pcp2Cre;TRPC3fl/fl	WT	Lobule X	1	2	350	0.1696	40.6982	0.257088	7.0495
	pcp2Cre;TRPC3fl/fl	WT	Lobule X	1	3	350	0.1358	43.1671	0.258543	4.9377
	pcp2Cre;TRPC3fl/fl	WT	Lobule X	1	4	220	0.174	36.2	0.276036	0.9765
	pcp2Cre;TRPC3fl/fl	WT	Lobule X	1	5	510	0.1208	40.5762	0.297528	4.8889
	pcp2Cre;TRPC3fl/fl	WT	Lobule X	2	6	420	0.1166	45.4895	0.31564	7.9895
	pcp2Cre;TRPC3fl/fl	WT	Lobule X	2	7	675	0.0689	45.9839	0.435469	13.98
	pcp2Cre;TRPC3fl/fl	WT	Lobule X	3	8	281	0.0782	53.5973	0.384358	3.09398
	pcp2Cre;TRPC3fl/fl	WT	Lobule X	3	9	490	0.0969	43.4444	0.40386	8.8045
	pcp2Cre;TRPC3fl/fl	WT	Lobule X	3	10	542	0.0865	33.8984	0.271996	4.53264
	pcp2Cre;TRPC3fl/fl	WT	Lobule X	4	11	550	0.155	51.4714	0.158331	2.129
	pcp2Cre;TRPC3fl/fl	WT	Lobule X	4	12	350	0.1081	37.9774	0.176397	0.8767
	pcp2Cre;TRPC3fl/fl	MUT	Lobules I-III	1	1	400	0.1632	53.9002	0.215117	5.2429
	pcp2Cre;TRPC3fl/fl	MUT	Lobules I-III	2	2	490	0.125	44.3444	0.235929	8.66667
	pcp2Cre;TRPC3fl/fl	MUT	Lobules I-III	2	3	480	0.2172	47.5657	0.257065	4.00451
	pcp2Cre;TRPC3fl/fl	MUT	Lobules I-III	2	4	565	0.129	34.1707	0.221372	6.32625
	pcp2Cre;TRPC3fl/fl	MUT	Lobules I-III	3	5	400	0.1481	35.0464	0.300406	5.3222
	pcp2Cre;TRPC3fl/fl	MUT	Lobules I-III	3	6	341	0.2028	45.8099	0.260689	3.3935
	pcp2Cre;TRPC3fl/fl	MUT	Lobules I-III	4	7	376	0.1501	71.7427	0.143066	0.3125
	pcp2Cre;TRPC3fl/fl	MUT	Lobules I-III	4	8	403	0.131	70.0241	0.113815	2.4685
	pcp2Cre;TRPC3fl/fl	MUT	Lobules I-III	4	9	376	0.0939	64.5872	0.159945	0.9686
	pcp2Cre;TRPC3fl/fl	MUT	Lobules I-III	4	10	433	0.2188	38.3086	0.188206	5.8432
	pcp2Cre;TRPC3fl/fl	MUT	Lobules I-III	4	11	500	0.1835	74.4299	0.136739	3.4684
	pcp2Cre;TRPC3fl/fl	MUT	Lobules I-III	4	12	536	0.1075	48.2138	0.169632	4.1245
	pcp2Cre;TRPC3fl/fl	MUT	Lobules I-III	4	13	546	0.2188	82.1791	0.125934	3.7809
	pcp2Cre;TRPC3fl/fl	MUT	Lobules I-III	4	14	323	0.1495	81.5542	0.118062	1.5936
	pcp2Cre;TRPC3fl/fl	MUT	Lobules I-III	5	15	355	0.1536	62.0224	0.151427	0.8766
	pcp2Cre;TRPC3fl/fl	MUT	Lobules I-III	5	16	523	0.1302	41.2021	0.14607	2.3169
	pcp2Cre;TRPC3fl/fl	MUT	Lobules I-III	5	17	427	0.2003	54.3831	0.146139	1.3463
	pcp2Cre;TRPC3fl/fl	MUT	Lobule X	1	1	285.5	0.0808	48.3093	0.259406	0.3235
	pcp2Cre;TRPC3fl/fl	MUT	Lobule X	1	2	300	0.0955	57.2601	0.334726	4.956
	pcp2Cre;TRPC3fl/fl	MUT	Lobule X	2	3	500	0.1135	48.761	0.298045	4.364
	pcp2Cre;TRPC3fl/fl	MUT	Lobule X	2	4	300	0.1099	32.196	0.325521	2.1606
	pcp2Cre;TRPC3fl/fl	MUT	Lobule X	2	5	445	0.1074	51.0681	0.277827	0.5432
	pcp2Cre;TRPC3fl/fl	MUT	Lobule X	2	6	580	0.0787	41.7908	0.274532	5.6213
	pcp2Cre;TRPC3fl/fl	MUT	Lobule X	3	7	323	0.1248	42.1832	0.279926	0.4375
	pcp2Cre;TRPC3fl/fl	MUT	Lobule X	4	8	361	0.1103	59.7752	0.204713	5.0308
	pcp2Cre;TRPC3fl/fl	MUT	Lobule X	4	9	500	0.1005	55.5256	0.306043	3.8433
	pcp2Cre;TRPC3fl/fl	MUT	Lobule X	4	10	349	0.0829	52.5884	0.242747	5.9056
	pcp2Cre;TRPC3fl/fl	MUT	Lobule X	5	11	427	0.1317	54.4457	0.249821	3.444
	pcp2Cre;TRPC3fl/fl	MUT	Lobule X	5	12	322	0.113	38	0.242739	6.3
	Mouse line	Genetype	Location	Average		Holding current (pA)	Slope	Peak (mV)	HW (ms)	AHP (mV)
	average over cells
	pcp2Cre;TRPC3fl/fl	WT	Lobules I-III	mean		405.882	0.191947	55.7572	0.208134	4.36686
				sem		22.3207	0.01072	4.27498	0.0171095	0.39002
			Lobule X	mean		422.333	0.1152	43.5074	0.299126	5.80952
				sem		38.1251	0.0106765	1.75194	0.0245734	1.15289
		MUT	Lobules I-III	mean		439.647	0.160147	55.852	0.181742	3.53271
				sem		18.6254	0.00970826	3.86261	0.0136978	0.54717
			Lobule X	mean		391.042	0.104083	48.4919	0.27467	3.57748
				sem		27.993	0.00489681	2.4199	0.0108516	0.635987
	average per mouse, averaged over mice
	pcp2Cre;TRPC3fl/fl	WT	Lobules I-III	mean		416.333	0.190528	54.9894	0.208228	4.29014
				sem		22.8006	0.0143318	7.13719	0.0305231	0.472489
			Lobule X	mean		446.792	0.111485	44.0383	0.296254	5.90656
				sem		40.0221	0.0124843	0.78955	0.046748	1.94562
		MUT	Lobules I-III	mean		430.758	0.162744	51.0542	0.205218	4.0533
				sem		23.6386	0.00341371	4.68817	0.0263047	0.8566
			Lobule X	mean		369.967	0.107115	48.1216	0.273684	3.20962
				sem		28.937	0.00711308	2.68225	0.0106199	0.828318

## Sheet: Statistics
	Statistics (T test) for in vitro firing activity of PCs in TRPC3Mwk/-mice and pcp2Cre;TRPC3fl/fl mice
	Mouse line	Location	Statistics	Spike rate (Hz)	CV	CV2_mean
	TRPC3Mwk/-	Lobules I-III	t-value	-2.47	0.68	1.43
			df	28	28	21.5
			P-value	0.02	0.501	0.168
		Lobule X	t-value	0.419	1.75	1.62
			df	17.9	17.3	23
			P-value	0.68	0.099	0.119
	pcp2Cre;TRPC3fl/fl	Lobules I-III	t-value	2.69	2.19	2.61
			df	81	81	81
			P-value	0.009	0.031	0.011
		Lobule X	t-value	0.937	-1.13	-0.977
			df	64	71	67
			P-value	0.352	0.263	0.332
	Mouse line	Location	Average	Holding current (pA)	Slope	Peak (mV)	HW (ms)	AHP (mV)
	pcp2Cre;TRPC3fl/fl	Lobules I-III	t-value	1.16	-2.2	0.02	-1.1	-1.24
			df	32	32	32	32	32
			P-value	0.254	0.035	0.987	0.279	0.223
		Lobule X	t-value	-0.66	-0.95	1.67	-0.91	-1.7
			df	22	22	22	15	22
			P-value	0.515	0.354	0.109	0.377	0.108
