# Supplementary material for: TRPC3 is a major contributor to functional heterogeneity of cerebellar Purkinje cells
Source: eLife journal article supplement (doi:10.7554/elife.45590), 2019-09-05
Supplement: supp [file elife-45590-supp-v1.zip › elife_poa_e45590_Figure_3_source_data_1.xlsx]

## Sheet: In vivo recording_simple spike
	In vivo extracellular recording
	Mouse line	Genetype	Location	Mouse nr.	PC nr.	Simple spike
						Spike rate (Hz)	CV	CV2_mean
	TRPC3Mwk/-	WT	Lobules I-III	1	1	74.375	0.5431	0.5612
	TRPC3Mwk/-	WT	Lobules I-III	1	2	98.5625	0.47946	0.47837
	TRPC3Mwk/-	WT	Lobules I-III	1	3	78.2997	0.39039	0.43264
	TRPC3Mwk/-	WT	Lobules I-III	1	4	100.269	0.579	0.51465
	TRPC3Mwk/-	WT	Lobules I-III	1	5	118.933	0.6022	0.5301
	TRPC3Mwk/-	WT	Lobules I-III	1	6	113.526	0.4198	0.4419
	TRPC3Mwk/-	WT	Lobules I-III	2	7	74.9833	0.34802	0.36965
	TRPC3Mwk/-	WT	Lobules I-III	2	8	80.1954	0.4272	0.43019
	TRPC3Mwk/-	WT	Lobules I-III	2	9	93.0117	0.33569	0.36425
	TRPC3Mwk/-	WT	Lobules I-III	2	10	86.2536	0.33911	0.3311
	TRPC3Mwk/-	WT	Lobules I-III	2	11	105.133	0.4019	0.4197
	TRPC3Mwk/-	WT	Lobules I-III	2	12	99.5672	0.3108	0.3343
	TRPC3Mwk/-	WT	Lobules I-III	3	13	75.86	0.53496	0.42882
	TRPC3Mwk/-	WT	Lobules I-III	3	14	63.4547	0.4333	0.44732
	TRPC3Mwk/-	WT	Lobules I-III	3	15	94.1875	0.49457	0.45874
	TRPC3Mwk/-	WT	Lobules I-III	3	16	103.7	0.55815	0.46236
	TRPC3Mwk/-	WT	Lobules I-III	3	17	90.0714	0.4398	0.44616
	TRPC3Mwk/-	WT	Lobules I-III	3	18	123.751	0.46797	0.40647
	TRPC3Mwk/-	WT	Lobules I-III	4	19	66.25	0.36368	0.38297
	TRPC3Mwk/-	WT	Lobules I-III	4	20	66.75	0.48998	0.47404
	TRPC3Mwk/-	WT	Lobules I-III	4	21	80.5047	0.40759	0.41695
	TRPC3Mwk/-	WT	Lobules I-III	4	22	60.9444	0.36168	0.38009
	TRPC3Mwk/-	WT	Lobules I-III	4	23	97.5222	0.3762	0.3998
	TRPC3Mwk/-	WT	Lobules I-III	4	24	67.6833	0.4946	0.5208
	TRPC3Mwk/-	WT	Lobules I-III	4	25	103.6	0.5216	0.4944
	TRPC3Mwk/-	WT	Lobules I-III	5	26	83.5875	0.3446	0.345
	TRPC3Mwk/-	WT	Lobules I-III	5	27	103.544	0.4577	0.4416
	TRPC3Mwk/-	WT	Lobules I-III	5	28	101.888	0.3245	0.3524
	TRPC3Mwk/-	WT	Lobules I-III	5	29	95.275	0.4376	0.4606
	TRPC3Mwk/-	WT	Lobules I-III	5	30	86.1875	0.4407	0.4251
	TRPC3Mwk/-	WT	Lobules I-III	5	31	90	0.3776	0.4065
	TRPC3Mwk/-	WT	Lobules I-III	5	32	80.1167	0.3248	0.3386
	TRPC3Mwk/-	WT	Lobules I-III	5	33	101.371	0.4304	0.4394
	TRPC3Mwk/-	WT	Lobules I-III	5	34	100.241	0.3463	0.3453
	TRPC3Mwk/-	WT	Lobules I-III	6	35	76.4462	0.4279	0.4178
	TRPC3Mwk/-	WT	Lobules I-III	6	36	98.1707	0.3838	0.3917
	TRPC3Mwk/-	WT	Lobules I-III	6	37	81.6667	0.4549	0.4205
	TRPC3Mwk/-	WT	Lobules I-III	6	38	96.9875	0.4236	0.4531
	TRPC3Mwk/-	WT	Lobules I-III	6	39	77.0667	0.3605	0.3548
	TRPC3Mwk/-	WT	Lobules I-III	6	40	75.8	0.4551	0.4536
	TRPC3Mwk/-	WT	Lobule X	1	1	46.125	0.2779	0.2568
	TRPC3Mwk/-	WT	Lobule X	1	2	40.9823	0.2584	0.2285
	TRPC3Mwk/-	WT	Lobule X	1	3	34.0125	0.3073	0.2994
	TRPC3Mwk/-	WT	Lobule X	1	4	52.1918	0.2852	0.2695
	TRPC3Mwk/-	WT	Lobule X	1	5	50.18	0.3547	0.3556
	TRPC3Mwk/-	WT	Lobule X	2	6	41.5429	0.3168	0.2927
	TRPC3Mwk/-	WT	Lobule X	2	7	56.8143	0.2601	0.2024
	TRPC3Mwk/-	WT	Lobule X	2	8	47.0538	0.26255	0.26819
	TRPC3Mwk/-	WT	Lobule X	2	9	55.25	0.22703	0.22213
	TRPC3Mwk/-	WT	Lobule X	2	10	38.5489	0.31265	0.30297
	TRPC3Mwk/-	WT	Lobule X	2	11	70.3649	0.2989	0.3208
	TRPC3Mwk/-	WT	Lobule X	2	12	42.3542	0.2213	0.21256
	TRPC3Mwk/-	WT	Lobule X	3	13	32.1139	0.39891	0.37767
	TRPC3Mwk/-	WT	Lobule X	3	14	36.5333	0.44892	0.38402
	TRPC3Mwk/-	WT	Lobule X	3	15	30.1197	0.45832	0.37802
	TRPC3Mwk/-	WT	Lobule X	3	16	30.775	0.54603	0.51661
	TRPC3Mwk/-	WT	Lobule X	4	17	47.11	0.3395	0.3292
	TRPC3Mwk/-	WT	Lobule X	4	18	40.0615	0.4356	0.3394
	TRPC3Mwk/-	WT	Lobule X	4	19	57.215	0.3019	0.2927
	TRPC3Mwk/-	WT	Lobule X	4	20	32.9857	0.485	0.4738
	TRPC3Mwk/-	WT	Lobule X	4	21	56.9412	0.3656	0.3656
	TRPC3Mwk/-	WT	Lobule X	5	22	40.5233	0.3608	0.3625
	TRPC3Mwk/-	WT	Lobule X	5	23	56.0333	0.3464	0.3254
	TRPC3Mwk/-	WT	Lobule X	5	24	50.92	0.3303	0.3327
	TRPC3Mwk/-	MUT	Lobules I-III	1	1	127.75	0.5395	0.3944
	TRPC3Mwk/-	MUT	Lobules I-III	1	2	143.4	0.4982	0.3981
	TRPC3Mwk/-	MUT	Lobules I-III	1	3	153.256	0.5814	0.4378
	TRPC3Mwk/-	MUT	Lobules I-III	1	4	133.762	0.4655	0.3727
	TRPC3Mwk/-	MUT	Lobules I-III	1	5	157.957	0.4676	0.3937
	TRPC3Mwk/-	MUT	Lobules I-III	2	6	101.714	0.51277	0.35738
	TRPC3Mwk/-	MUT	Lobules I-III	2	7	87.4687	0.4684	0.35166
	TRPC3Mwk/-	MUT	Lobules I-III	2	8	106.185	0.41038	0.34751
	TRPC3Mwk/-	MUT	Lobules I-III	2	9	110.258	0.60367	0.41411
	TRPC3Mwk/-	MUT	Lobules I-III	2	10	98.7071	0.56073	0.40732
	TRPC3Mwk/-	MUT	Lobules I-III	2	11	118.574	0.71873	0.51891
	TRPC3Mwk/-	MUT	Lobules I-III	3	12	138.024	0.3785	0.3745
	TRPC3Mwk/-	MUT	Lobules I-III	3	13	98.1552	0.7373	0.4218
	TRPC3Mwk/-	MUT	Lobules I-III	3	14	100.077	0.5908	0.4883
	TRPC3Mwk/-	MUT	Lobules I-III	4	15	108.886	0.4339	0.3963
	TRPC3Mwk/-	MUT	Lobules I-III	4	16	114.668	0.4483	0.4053
	TRPC3Mwk/-	MUT	Lobules I-III	4	17	101.677	0.5435	0.4784
	TRPC3Mwk/-	MUT	Lobules I-III	4	18	95.02	0.4342	0.3729
	TRPC3Mwk/-	MUT	Lobules I-III	4	19	116.2	0.539	0.4145
	TRPC3Mwk/-	MUT	Lobules I-III	4	20	81.2857	0.5299	0.4366
	TRPC3Mwk/-	MUT	Lobules I-III	4	21	102.469	0.5933	0.4201
	TRPC3Mwk/-	MUT	Lobules I-III	5	22	74.31	0.7764	0.4512
	TRPC3Mwk/-	MUT	Lobules I-III	5	23	108.6	0.7445	0.4255
	TRPC3Mwk/-	MUT	Lobules I-III	5	24	83.46	0.7493	0.4716
	TRPC3Mwk/-	MUT	Lobules I-III	5	25	111.1	0.5033	0.4402
	TRPC3Mwk/-	MUT	Lobules I-III	5	26	135.883	0.4145	0.3813
	TRPC3Mwk/-	MUT	Lobules I-III	5	27	83.0429	0.6618	0.4278
	TRPC3Mwk/-	MUT	Lobules I-III	5	28	137.437	0.386	0.3695
	TRPC3Mwk/-	MUT	Lobules I-III	6	29	83.2571	0.7376	0.4159
	TRPC3Mwk/-	MUT	Lobules I-III	6	30	97.9842	0.6766	0.3612
	TRPC3Mwk/-	MUT	Lobules I-III	6	31	126.562	0.4951	0.4014
	TRPC3Mwk/-	MUT	Lobules I-III	7	32	83.8299	0.4657	0.4492
	TRPC3Mwk/-	MUT	Lobules I-III	7	33	150.818	0.6099	0.3815
	TRPC3Mwk/-	MUT	Lobules I-III	7	34	92.66	0.5794	0.3913
	TRPC3Mwk/-	MUT	Lobules I-III	7	35	83.4167	0.542	0.4538
	TRPC3Mwk/-	MUT	Lobules I-III	7	36	99.375	0.4786	0.3817
	TRPC3Mwk/-	MUT	Lobule X	1	1	48.102	0.9422	0.2942
	TRPC3Mwk/-	MUT	Lobule X	1	2	59.4638	0.3899	0.2191
	TRPC3Mwk/-	MUT	Lobule X	2	3	51.3813	0.80549	0.27298
	TRPC3Mwk/-	MUT	Lobule X	2	4	52.0628	0.56376	0.41287
	TRPC3Mwk/-	MUT	Lobule X	3	5	40.9375	1.2162	0.2687
	TRPC3Mwk/-	MUT	Lobule X	3	6	95.1	0.4282	0.2138
	TRPC3Mwk/-	MUT	Lobule X	3	7	28.5682	0.9712	0.3897
	TRPC3Mwk/-	MUT	Lobule X	3	8	48.1356	0.8518	0.3221
	TRPC3Mwk/-	MUT	Lobule X	4	9	52.3759	0.5673	0.2774
	TRPC3Mwk/-	MUT	Lobule X	4	10	52.3155	0.9176	0.2499
	TRPC3Mwk/-	MUT	Lobule X	4	11	53.2889	0.719	0.3142
	TRPC3Mwk/-	MUT	Lobule X	4	12	43.3194	1.0854	0.5259
	TRPC3Mwk/-	MUT	Lobule X	5	13	61.2903	0.534	0.3204
	TRPC3Mwk/-	MUT	Lobule X	5	14	56.377	0.6562	0.2583
	TRPC3Mwk/-	MUT	Lobule X	6	15	51.7015	0.355	0.3593
	TRPC3Mwk/-	MUT	Lobule X	6	16	37.2333	0.6089	0.2699
	TRPC3Mwk/-	MUT	Lobule X	6	17	31.9385	1.1682	0.2693
	TRPC3Mwk/-	MUT	Lobule X	6	18	48.47	0.7522	0.2066
	TRPC3Mwk/-	MUT	Lobule X	6	19	42.6883	0.3497	0.3704
	TRPC3Mwk/-	MUT	Lobule X	6	20	57.4	0.6187	0.5186
	pcp2Cre;TRPC3fl/fl	WT	Lobules I-III	1	1	94.2167	0.4328	0.4282
	pcp2Cre;TRPC3fl/fl	WT	Lobules I-III	1	2	92.75	0.4837	0.4462
	pcp2Cre;TRPC3fl/fl	WT	Lobules I-III	2	3	97.5667	0.38023	0.36836
	pcp2Cre;TRPC3fl/fl	WT	Lobules I-III	3	4	105.858	0.52092	0.43959
	pcp2Cre;TRPC3fl/fl	WT	Lobules I-III	3	5	119.008	0.56816	0.43737
	pcp2Cre;TRPC3fl/fl	WT	Lobules I-III	3	6	97.9511	0.4925	0.4259
	pcp2Cre;TRPC3fl/fl	WT	Lobules I-III	4	7	117.344	0.41861	0.44573
	pcp2Cre;TRPC3fl/fl	WT	Lobules I-III	4	8	104.471	0.47436	0.43988
	pcp2Cre;TRPC3fl/fl	WT	Lobules I-III	4	9	99.4286	0.40177	0.40847
	pcp2Cre;TRPC3fl/fl	WT	Lobules I-III	4	10	117.8	0.49079	0.4543
	pcp2Cre;TRPC3fl/fl	WT	Lobules I-III	4	11	81.98	0.38803	0.40754
	pcp2Cre;TRPC3fl/fl	WT	Lobules I-III	5	12	68.9587	0.2927	0.30062
	pcp2Cre;TRPC3fl/fl	WT	Lobules I-III	5	13	75.5571	0.3951	0.3922
	pcp2Cre;TRPC3fl/fl	WT	Lobules I-III	5	14	74.8111	0.3713	0.36573
	pcp2Cre;TRPC3fl/fl	WT	Lobules I-III	5	15	87.1143	0.4132	0.4138
	pcp2Cre;TRPC3fl/fl	WT	Lobules I-III	5	16	69.1172	0.387	0.365
	pcp2Cre;TRPC3fl/fl	WT	Lobules I-III	5	17	84.4398	0.3889	0.407
	pcp2Cre;TRPC3fl/fl	WT	Lobules I-III	6	18	47.4	0.3067	0.2771
	pcp2Cre;TRPC3fl/fl	WT	Lobules I-III	7	19	60.95	0.3695	0.3164
	pcp2Cre;TRPC3fl/fl	WT	Lobules I-III	7	20	85.1286	0.5282	0.4736
	pcp2Cre;TRPC3fl/fl	WT	Lobules I-III	8	21	84.1167	0.35275	0.35736
	pcp2Cre;TRPC3fl/fl	WT	Lobules I-III	8	22	74.2248	0.3736	0.3521
	pcp2Cre;TRPC3fl/fl	WT	Lobules I-III	8	23	89.4429	0.3661	0.3737
	pcp2Cre;TRPC3fl/fl	WT	Lobules I-III	8	24	90.1571	0.4868	0.5364
	pcp2Cre;TRPC3fl/fl	WT	Lobules I-III	8	25	79.9926	0.3829	0.4055
	pcp2Cre;TRPC3fl/fl	WT	Lobules I-III	8	26	99.9975	0.4135	0.3862
	pcp2Cre;TRPC3fl/fl	WT	Lobule X	1	1	71.8833	0.2322	0.2306
	pcp2Cre;TRPC3fl/fl	WT	Lobule X	1	2	57.5857	0.28955	0.2763
	pcp2Cre;TRPC3fl/fl	WT	Lobule X	1	3	62.7667	0.29557	0.27467
	pcp2Cre;TRPC3fl/fl	WT	Lobule X	1	4	44.4	0.3034	0.2404
	pcp2Cre;TRPC3fl/fl	WT	Lobule X	2	5	27.3895	0.52764	0.4701
	pcp2Cre;TRPC3fl/fl	WT	Lobule X	2	6	25.2049	0.34528	0.32452
	pcp2Cre;TRPC3fl/fl	WT	Lobule X	3	7	55.45	0.33123	0.28572
	pcp2Cre;TRPC3fl/fl	WT	Lobule X	3	8	41.3857	0.37368	0.29994
	pcp2Cre;TRPC3fl/fl	WT	Lobule X	3	9	59.775	0.31734	0.30252
	pcp2Cre;TRPC3fl/fl	WT	Lobule X	3	10	43.37	0.36995	0.32305
	pcp2Cre;TRPC3fl/fl	WT	Lobule X	3	11	72.9177	0.31243	0.27374
	pcp2Cre;TRPC3fl/fl	WT	Lobule X	3	12	51.0388	0.37213	0.32923
	pcp2Cre;TRPC3fl/fl	WT	Lobule X	3	13	52.1264	0.2827	0.27951
	pcp2Cre;TRPC3fl/fl	WT	Lobule X	4	14	55.3571	0.2925	0.2523
	pcp2Cre;TRPC3fl/fl	WT	Lobule X	4	15	43.975	0.3247	0.285
	pcp2Cre;TRPC3fl/fl	WT	Lobule X	4	16	49.9053	0.2202	0.1837
	pcp2Cre;TRPC3fl/fl	WT	Lobule X	4	17	72.2174	0.2811	0.2243
	pcp2Cre;TRPC3fl/fl	WT	Lobule X	4	18	36.2875	0.3499	0.3025
	pcp2Cre;TRPC3fl/fl	WT	Lobule X	5	19	43.481	0.3207	0.2754
	pcp2Cre;TRPC3fl/fl	WT	Lobule X	5	20	49.3571	0.2853	0.2555
	pcp2Cre;TRPC3fl/fl	WT	Lobule X	6	21	57.0286	0.2678	0.2381
	pcp2Cre;TRPC3fl/fl	WT	Lobule X	6	22	37.0833	0.2939	0.2842
	pcp2Cre;TRPC3fl/fl	WT	Lobule X	6	23	36.7708	0.2595	0.2371
	pcp2Cre;TRPC3fl/fl	WT	Lobule X	6	24	54.1125	0.2135	0.2021
	pcp2Cre;TRPC3fl/fl	MUT	Lobules I-III	1	1	95.8333	0.35071	0.39243
	pcp2Cre;TRPC3fl/fl	MUT	Lobules I-III	1	2	64.4222	0.4732	0.4479
	pcp2Cre;TRPC3fl/fl	MUT	Lobules I-III	1	3	99.4073	0.3578	0.3559
	pcp2Cre;TRPC3fl/fl	MUT	Lobules I-III	1	4	106.029	0.358	0.3456
	pcp2Cre;TRPC3fl/fl	MUT	Lobules I-III	1	5	96.25	0.3464	0.3415
	pcp2Cre;TRPC3fl/fl	MUT	Lobules I-III	2	6	88.0258	0.5264	0.4967
	pcp2Cre;TRPC3fl/fl	MUT	Lobules I-III	2	7	91.51	0.4659	0.4578
	pcp2Cre;TRPC3fl/fl	MUT	Lobules I-III	2	8	92.7882	0.4396	0.4358
	pcp2Cre;TRPC3fl/fl	MUT	Lobules I-III	2	9	88.2875	0.4465	0.4929
	pcp2Cre;TRPC3fl/fl	MUT	Lobules I-III	3	10	73.6286	0.6631	0.5478
	pcp2Cre;TRPC3fl/fl	MUT	Lobules I-III	4	11	79.77	0.47184	0.46053
	pcp2Cre;TRPC3fl/fl	MUT	Lobules I-III	4	12	46.04	0.53186	0.50566
	pcp2Cre;TRPC3fl/fl	MUT	Lobules I-III	4	13	66.1958	0.37026	0.38601
	pcp2Cre;TRPC3fl/fl	MUT	Lobules I-III	4	14	97.6185	0.4155	0.39782
	pcp2Cre;TRPC3fl/fl	MUT	Lobules I-III	4	15	99.4083	0.40246	0.39632
	pcp2Cre;TRPC3fl/fl	MUT	Lobules I-III	4	16	71.775	0.57977	0.47239
	pcp2Cre;TRPC3fl/fl	MUT	Lobules I-III	4	17	56.5083	0.68253	0.58772
	pcp2Cre;TRPC3fl/fl	MUT	Lobules I-III	4	18	66.773	0.49701	0.45219
	pcp2Cre;TRPC3fl/fl	MUT	Lobules I-III	4	19	49.3833	0.65762	0.57982
	pcp2Cre;TRPC3fl/fl	MUT	Lobules I-III	5	20	43.5286	0.3388	0.3534
	pcp2Cre;TRPC3fl/fl	MUT	Lobules I-III	6	21	57.3846	0.44329	0.38399
	pcp2Cre;TRPC3fl/fl	MUT	Lobules I-III	6	22	73.9571	0.42207	0.44667
	pcp2Cre;TRPC3fl/fl	MUT	Lobules I-III	6	23	85.5667	0.35686	0.37761
	pcp2Cre;TRPC3fl/fl	MUT	Lobules I-III	6	24	69.6507	0.43271	0.42742
	pcp2Cre;TRPC3fl/fl	MUT	Lobules I-III	7	25	63.6875	0.28454	0.3073
	pcp2Cre;TRPC3fl/fl	MUT	Lobules I-III	7	26	42.25	0.49281	0.37237
	pcp2Cre;TRPC3fl/fl	MUT	Lobules I-III	7	27	67.8	0.31899	0.258
	pcp2Cre;TRPC3fl/fl	MUT	Lobules I-III	7	28	84.1209	0.4566	0.4486
	pcp2Cre;TRPC3fl/fl	MUT	Lobules I-III	7	29	57.4231	0.3014	0.2522
	pcp2Cre;TRPC3fl/fl	MUT	Lobules I-III	7	30	56.9647	0.515	0.4321
	pcp2Cre;TRPC3fl/fl	MUT	Lobule X	1	1	70.45	0.3127	0.26276
	pcp2Cre;TRPC3fl/fl	MUT	Lobule X	1	2	44.7502	0.3599	0.3422
	pcp2Cre;TRPC3fl/fl	MUT	Lobule X	2	3	60	0.22913	0.20666
	pcp2Cre;TRPC3fl/fl	MUT	Lobule X	2	4	61.17	0.247	0.2532
	pcp2Cre;TRPC3fl/fl	MUT	Lobule X	2	5	78.8571	0.3036	0.28846
	pcp2Cre;TRPC3fl/fl	MUT	Lobule X	2	6	75.3857	0.25684	0.26822
	pcp2Cre;TRPC3fl/fl	MUT	Lobule X	2	7	62.6833	0.1883	0.18677
	pcp2Cre;TRPC3fl/fl	MUT	Lobule X	2	8	49.7714	0.27588	0.23716
	pcp2Cre;TRPC3fl/fl	MUT	Lobule X	2	9	22.0835	0.34954	0.28095
	pcp2Cre;TRPC3fl/fl	MUT	Lobule X	3	10	46.35	0.2164	0.2032
	pcp2Cre;TRPC3fl/fl	MUT	Lobule X	3	11	23.0667	0.2802	0.255
	pcp2Cre;TRPC3fl/fl	MUT	Lobule X	3	12	35.1655	0.2527	0.1855
	pcp2Cre;TRPC3fl/fl	MUT	Lobule X	3	13	29.75	0.363	0.3326
	pcp2Cre;TRPC3fl/fl	MUT	Lobule X	3	14	34.6286	0.2551	0.2228
	pcp2Cre;TRPC3fl/fl	MUT	Lobule X	3	15	37.21	0.3339	0.29222
	pcp2Cre;TRPC3fl/fl	MUT	Lobule X	4	16	38.9444	0.3021	0.28755
	pcp2Cre;TRPC3fl/fl	MUT	Lobule X	4	17	34.1496	0.32286	0.29125
	pcp2Cre;TRPC3fl/fl	MUT	Lobule X	4	18	31.2892	0.42984	0.38531
	pcp2Cre;TRPC3fl/fl	MUT	Lobule X	4	19	39.2	0.42364	0.41914
	pcp2Cre;TRPC3fl/fl	MUT	Lobule X	4	20	37.0529	0.38218	0.32641
	pcp2Cre;TRPC3fl/fl	MUT	Lobule X	4	21	66.8	0.3195	0.2965
	pcp2Cre;TRPC3fl/fl	MUT	Lobule X	5	22	45.0667	0.3895	0.2113
	pcp2Cre;TRPC3fl/fl	MUT	Lobule X	6	23	60.41	0.2627	0.2725
	pcp2Cre;TRPC3fl/fl	MUT	Lobule X	6	24	59.9286	0.2091	0.1919
	pcp2Cre;TRPC3fl/fl	MUT	Lobule X	6	25	52.33	0.3231	0.2989
	pcp2Cre;TRPC3fl/fl	MUT	Lobule X	6	26	47.4167	0.2298	0.2105
	pcp2Cre;TRPC3fl/fl	MUT	Lobule X	6	27	48.7	0.31294	0.29446
	pcp2Cre;TRPC3fl/fl	MUT	Lobule X	7	28	59.0941	0.2656	0.2206
	pcp2Cre;TRPC3fl/fl	MUT	Lobule X	7	29	58.82	0.3078	0.3084
	pcp2Cre;TRPC3fl/fl	MUT	Lobule X	7	30	74.2963	0.3443	0.3506
	pcp2Cre;TRPC3fl/fl	MUT	Lobule X	7	31	54	0.38222	0.35935
	pcp2Cre;TRPC3fl/fl	MUT	Lobule X	8	32	67	0.31716	0.30424
	average over cells
	TRPC3Mwk/-	WT	Lobules I-III	mean		89.1435	0.427769	0.424324
				sd		15.2683	0.074708	0.0565408
			Lobule X	mean		45.2814	0.341671	0.321215
				sd		10.3649	0.0838133	0.0762228
		MUT	Lobules I-III	mean		109.645	0.552119	0.411261
				sd		22.6463	0.112388	0.0402416
			Lobule X	mean		50.6075	0.725048	0.316683
				sd		13.5882	0.264655	0.0902236
	pcp2Cre;TRPC3fl/fl	WT	Lobules I-III	mean		88.4532	0.418466	0.400933
				sd		17.4166	0.0682092	0.0558634
			Lobule X	mean		50.0362	0.310925	0.277104
				sd		12.9022	0.063834	0.0556391
		MUT	Lobules I-III	mean		74.3996	0.446651	0.420415
				sd		18.585	0.104631	0.0817525
			Lobule X	mean		50.1819	0.304642	0.276457
				sd		15.4987	0.0617992	0.059416
	average per mouse, averaged over mice
	TRPC3Mwk/-	WT	Lobules I-III	mean		89.0943	0.431072	0.426381
				sd		7.07668	0.0555524	0.0414767
			Lobule X	mean		44.6762	0.352486	0.331326
				sd		7.19879	0.0759222	0.0617374
		MUT	Lobules I-III	mean		110.21	0.557844	0.410422
				sd		14.9548	0.0490442	0.0135607
			Lobule X	mean		52.1257	0.712844	0.310283
				sd		4.5696	0.10729	0.034643
	pcp2Cre;TRPC3fl/fl	WT	Lobules I-III	mean		85.7861	0.415822	0.389883
				sd		19.7586	0.066453	0.052807
			Lobule X	mean		47.2326	0.318177	0.284548
				sd		11.3394	0.0635017	0.0588412
		MUT	Lobules I-III	mean		71.9664	0.452777	0.424803
				sd		16.6353	0.109249	0.0746031
			Lobule X	mean		52.3928	0.318337	0.27628
				sd		11.1325	0.0449882	0.0420646

## Sheet: Statistics
	Statistics (T test) for in vivo extracellular recording PCs firing activity in L7-TRPC3 KO, TRPC3-mwk mice
	Mouse line	Location	Statistics	Simple spike
				Spike rate (Hz)	CV	CV2_mean
	TRPC3Mwk/-	Lobules I-III	t-value	-4.58	-5.62	1.15
			df	60	60	74
			P-value	2.41×10^-5	5.37×10^-7	0.254
		Lobule X	t-value	-1.47	-6.22	0.181
			df	42	22	42
			P-value	0.148	2.8×10-6	0.857
	pcp2Cre;TRPC3fl/fl	Lobules I-III	t-value	2.88	-1.17	-1.03
			df	54	54	54
			P-value	0.006	0.246	0.31
		Lobule X	t-value	-0.053	0.371	0.041
			df	54	54	54
			P-valu	0.958	0.712	0.967
