# Supplementary material for: TRPC3 is a major contributor to functional heterogeneity of cerebellar Purkinje cells
Source: eLife journal article supplement (doi:10.7554/elife.45590), 2019-09-05
Supplement: supp [file elife-45590-supp-v1.zip › elife_poa_e45590_Figure_4_source_data_1.xlsx]

## Sheet: In vivo recording_simple spike
	In vivo extracellular recording PCs firing activity in pcp2Cre;TRPC3fl/fl;EAAT4GFP/- and pcp2CreERT2;TRPC3fl/fl mice
	In vivo extracellular recording
	Mouse line	Genetype	Location	Mouse nr.	PC nr.	Simple spike
						Spike rate (Hz)	CV	CV2_mean
	pcp2Cre;TRPC3fl/fl;EAAT4GFP/-	WT	Lobules I-III	1	1	32.7833	0.5941	0.5459
	pcp2Cre;TRPC3fl/fl;EAAT4GFP/-	WT	Lobules I-III	1	2	101.239	0.5433	0.5563
	pcp2Cre;TRPC3fl/fl;EAAT4GFP/-	WT	Lobules I-III	1	3	122.213	0.4929	0.3183
	pcp2Cre;TRPC3fl/fl;EAAT4GFP/-	WT	Lobules I-III	1	4	75.5567	0.3712	0.3448
	pcp2Cre;TRPC3fl/fl;EAAT4GFP/-	WT	Lobules I-III	1	5	46.3466	0.2871	0.2211
	pcp2Cre;TRPC3fl/fl;EAAT4GFP/-	WT	Lobules I-III	1	6	89.28	0.2987	0.2587
	pcp2Cre;TRPC3fl/fl;EAAT4GFP/-	WT	Lobules I-III	1	7	53.72	0.4183	0.3511
	pcp2Cre;TRPC3fl/fl;EAAT4GFP/-	WT	Lobules I-III	1	8	74.9221	0.3358	0.2852
	pcp2Cre;TRPC3fl/fl;EAAT4GFP/-	WT	Lobules I-III	1	9	81.9571	0.532	0.1541
	pcp2Cre;TRPC3fl/fl;EAAT4GFP/-	WT	Lobules I-III	1	10	86.8569	0.5006	0.2719
	pcp2Cre;TRPC3fl/fl;EAAT4GFP/-	WT	Lobules I-III	2	11	49.5	0.342	0.2478
	pcp2Cre;TRPC3fl/fl;EAAT4GFP/-	WT	Lobules I-III	2	12	42.0674	0.4279	0.3792
	pcp2Cre;TRPC3fl/fl;EAAT4GFP/-	WT	Lobules I-III	2	13	102.991	0.4922	0.3236
	pcp2Cre;TRPC3fl/fl;EAAT4GFP/-	WT	Lobules I-III	2	14	57.6418	0.4728	0.4665
	pcp2Cre;TRPC3fl/fl;EAAT4GFP/-	WT	Lobule X	1	1	24.3768	0.478	0.3939
	pcp2Cre;TRPC3fl/fl;EAAT4GFP/-	WT	Lobule X	1	2	47.8116	0.4891	0.4392
	pcp2Cre;TRPC3fl/fl;EAAT4GFP/-	WT	Lobule X	1	3	39.6375	0.3497	0.2665
	pcp2Cre;TRPC3fl/fl;EAAT4GFP/-	WT	Lobule X	1	4	40.4936	0.3745	0.2669
	pcp2Cre;TRPC3fl/fl;EAAT4GFP/-	WT	Lobule X	1	5	40.6222	0.3454	0.2697
	pcp2Cre;TRPC3fl/fl;EAAT4GFP/-	WT	Lobule X	1	6	38.917	0.3114	0.2699
	pcp2Cre;TRPC3fl/fl;EAAT4GFP/-	WT	Lobule X	2	7	15.786	0.9562	0.5386
	pcp2Cre;TRPC3fl/fl;EAAT4GFP/-	WT	Lobule X	2	8	21.19	0.7784	0.5188
	pcp2Cre;TRPC3fl/fl;EAAT4GFP/-	WT	Lobule X	2	9	34.1	0.4182	0.3055
	pcp2Cre;TRPC3fl/fl;EAAT4GFP/-	WT	Lobule X	2	10	33.63	0.6313	0.436
	pcp2Cre;TRPC3fl/fl;EAAT4GFP/-	WT	Lobule X	2	11	26.96	1.0346	0.5348
	pcp2Cre;TRPC3fl/fl;EAAT4GFP/-	MUT	Lobules I-III	1	1	59.9557	0.5739	0.4729
	pcp2Cre;TRPC3fl/fl;EAAT4GFP/-	MUT	Lobules I-III	1	2	68.8163	0.5144	0.4404
	pcp2Cre;TRPC3fl/fl;EAAT4GFP/-	MUT	Lobules I-III	2	3	70.1807	0.386	0.2418
	pcp2Cre;TRPC3fl/fl;EAAT4GFP/-	MUT	Lobules I-III	2	4	78.009	0.3559	0.3389
	pcp2Cre;TRPC3fl/fl;EAAT4GFP/-	MUT	Lobules I-III	2	5	33.88	0.4102	0.2823
	pcp2Cre;TRPC3fl/fl;EAAT4GFP/-	MUT	Lobules I-III	3	6	56.25	0.4212	0.3753
	pcp2Cre;TRPC3fl/fl;EAAT4GFP/-	MUT	Lobules I-III	3	7	22.6216	0.5536	0.4522
	pcp2Cre;TRPC3fl/fl;EAAT4GFP/-	MUT	Lobules I-III	3	8	33.4131	0.4675	0.4284
	pcp2Cre;TRPC3fl/fl;EAAT4GFP/-	MUT	Lobules I-III	3	9	25.4864	0.4893	0.4486
	pcp2Cre;TRPC3fl/fl;EAAT4GFP/-	MUT	Lobules I-III	3	10	13.3972	0.5796	0.4784
	pcp2Cre;TRPC3fl/fl;EAAT4GFP/-	MUT	Lobules I-III	3	11	32.5212	0.5881	0.4665
	pcp2Cre;TRPC3fl/fl;EAAT4GFP/-	MUT	Lobules I-III	3	12	17.8104	0.5528	0.4399
	pcp2Cre;TRPC3fl/fl;EAAT4GFP/-	MUT	Lobules I-III	3	13	9.4579	0.7802	0.6433
	pcp2Cre;TRPC3fl/fl;EAAT4GFP/-	MUT	Lobules I-III	3	14	9.4952	0.9523	0.6449
	pcp2Cre;TRPC3fl/fl;EAAT4GFP/-	MUT	Lobules I-III	3	15	39.4604	0.4034	0.3216
	pcp2Cre;TRPC3fl/fl;EAAT4GFP/-	MUT	Lobules I-III	3	16	13.61	0.779	0.5782
	pcp2Cre;TRPC3fl/fl;EAAT4GFP/-	MUT	Lobule X	1	1	75.8161	0.3046	0.2419
	pcp2Cre;TRPC3fl/fl;EAAT4GFP/-	MUT	Lobule X	1	2	43.026	0.5796	0.4924
	pcp2Cre;TRPC3fl/fl;EAAT4GFP/-	MUT	Lobule X	2	3	10.2164	0.8027	0.6221
	pcp2Cre;TRPC3fl/fl;EAAT4GFP/-	MUT	Lobule X	2	4	17.43	0.7766	0.6348
	pcp2Cre;TRPC3fl/fl;EAAT4GFP/-	MUT	Lobule X	2	5	29.2727	0.3993	0.4139
	pcp2Cre;TRPC3fl/fl;EAAT4GFP/-	MUT	Lobule X	3	6	37.5175	0.2147	0.2023
	pcp2Cre;TRPC3fl/fl;EAAT4GFP/-	MUT	Lobule X	3	7	43.4015	0.2704	0.2673
	pcp2Cre;TRPC3fl/fl;EAAT4GFP/-	MUT	Lobule X	3	8	44.813	0.3187	0.2881
	pcp2Cre;TRPC3fl/fl;EAAT4GFP/-	MUT	Lobule X	3	9	61.9902	0.2544	0.2093
	pcp2Cre;TRPC3fl/fl;EAAT4GFP/-	MUT	Lobule X	3	10	35.0854	0.4001	0.4147
	pcp2Cre;TRPC3fl/fl;EAAT4GFP/-	MUT	Lobule X	3	11	31.1254	0.5392	0.4197
	pcp2Cre;TRPC3fl/fl;EAAT4GFP/-	MUT	Lobule X	3	12	10.0327	0.8185	0.6612
	pcp2CreERT2;TRPC3fl/fl	WT	Lobules I-III	1	1	87.4833	0.4206	0.416
	pcp2CreERT2;TRPC3fl/fl	WT	Lobules I-III	1	2	87.9667	0.3597	0.3808
	pcp2CreERT2;TRPC3fl/fl	WT	Lobules I-III	1	3	107.32	0.362	0.3425
	pcp2CreERT2;TRPC3fl/fl	WT	Lobules I-III	1	4	82.5556	0.3922	0.3974
	pcp2CreERT2;TRPC3fl/fl	WT	Lobules I-III	1	5	95.775	0.4245	0.4043
	pcp2CreERT2;TRPC3fl/fl	WT	Lobules I-III	1	6	100.55	0.3479	0.3064
	pcp2CreERT2;TRPC3fl/fl	WT	Lobules I-III	2	7	77.2111	0.3912	0.3982
	pcp2CreERT2;TRPC3fl/fl	WT	Lobules I-III	2	8	90.0675	0.3401	0.3184
	pcp2CreERT2;TRPC3fl/fl	WT	Lobules I-III	2	9	73.625	0.4109	0.3469
	pcp2CreERT2;TRPC3fl/fl	WT	Lobules I-III	2	10	75.4	0.3013	0.3255
	pcp2CreERT2;TRPC3fl/fl	WT	Lobules I-III	2	11	85.8857	0.3871	0.3515
	pcp2CreERT2;TRPC3fl/fl	WT	Lobules I-III	2	12	79.6083	0.6029	0.5508
	pcp2CreERT2;TRPC3fl/fl	WT	Lobules I-III	2	13	94.8889	0.4337	0.3705
	pcp2CreERT2;TRPC3fl/fl	WT	Lobules I-III	3	14	64.1333	0.3712	0.3612
	pcp2CreERT2;TRPC3fl/fl	WT	Lobules I-III	3	15	85.44	0.3817	0.3749
	pcp2CreERT2;TRPC3fl/fl	WT	Lobules I-III	3	16	76.7794	0.4059	0.3744
	pcp2CreERT2;TRPC3fl/fl	WT	Lobules I-III	3	17	71.95	0.5493	0.4692
	pcp2CreERT2;TRPC3fl/fl	WT	Lobules I-III	3	18	79.4	0.4227	0.3514
	pcp2CreERT2;TRPC3fl/fl	WT	Lobules I-III	3	19	92.5556	0.3962	0.3713
	pcp2CreERT2;TRPC3fl/fl	WT	Lobules I-III	3	20	97.5333	0.4421	0.4304
	pcp2CreERT2;TRPC3fl/fl	WT	Lobules I-III	3	21	100.867	0.4062	0.3665
	pcp2CreERT2;TRPC3fl/fl	WT	Lobules I-III	4	22	90.955	0.3839	0.3034
	pcp2CreERT2;TRPC3fl/fl	WT	Lobules I-III	4	23	93.4	0.376	0.4002
	pcp2CreERT2;TRPC3fl/fl	WT	Lobules I-III	4	24	96.9426	0.3557	0.3554
	pcp2CreERT2;TRPC3fl/fl	WT	Lobules I-III	4	25	73.0077	0.4157	0.3784
	pcp2CreERT2;TRPC3fl/fl	WT	Lobule X	1	1	36.0875	0.4186	0.4013
	pcp2CreERT2;TRPC3fl/fl	WT	Lobule X	1	2	40.8167	0.3012	0.3003
	pcp2CreERT2;TRPC3fl/fl	WT	Lobule X	1	3	57.6286	0.2596	0.2416
	pcp2CreERT2;TRPC3fl/fl	WT	Lobule X	1	4	52.8667	0.3266	0.2857
	pcp2CreERT2;TRPC3fl/fl	WT	Lobule X	1	5	31.85	0.33	0.2998
	pcp2CreERT2;TRPC3fl/fl	WT	Lobule X	1	6	42.6441	0.2837	0.25
	pcp2CreERT2;TRPC3fl/fl	WT	Lobule X	2	7	70.7969	0.2678	0.2785
	pcp2CreERT2;TRPC3fl/fl	WT	Lobule X	2	8	62.9333	0.2958	0.319
	pcp2CreERT2;TRPC3fl/fl	WT	Lobule X	2	9	57.4632	0.2585	0.2057
	pcp2CreERT2;TRPC3fl/fl	WT	Lobule X	2	10	52.8	0.2714	0.2609
	pcp2CreERT2;TRPC3fl/fl	WT	Lobule X	2	11	49.3966	0.3725	0.306
	pcp2CreERT2;TRPC3fl/fl	WT	Lobule X	2	12	40.1333	0.3523	0.3388
	pcp2CreERT2;TRPC3fl/fl	WT	Lobule X	3	13	48.22	0.311	0.2689
	pcp2CreERT2;TRPC3fl/fl	WT	Lobule X	3	14	35.8	0.3562	0.3117
	pcp2CreERT2;TRPC3fl/fl	WT	Lobule X	3	15	83.21	0.3538	0.3833
	pcp2CreERT2;TRPC3fl/fl	WT	Lobule X	3	16	52.7167	0.3543	0.3192
	pcp2CreERT2;TRPC3fl/fl	WT	Lobule X	3	17	61.1053	0.236	0.2162
	pcp2CreERT2;TRPC3fl/fl	MUT	Lobules I-III	1	1	81.45	0.3264	0.3472
	pcp2CreERT2;TRPC3fl/fl	MUT	Lobules I-III	1	2	83.7796	0.3124	0.325
	pcp2CreERT2;TRPC3fl/fl	MUT	Lobules I-III	1	3	68.4506	0.3037	0.34
	pcp2CreERT2;TRPC3fl/fl	MUT	Lobules I-III	1	4	90.1429	0.458	0.4676
	pcp2CreERT2;TRPC3fl/fl	MUT	Lobules I-III	1	5	79.6714	0.5423	0.4078
	pcp2CreERT2;TRPC3fl/fl	MUT	Lobules I-III	1	6	82.1	0.4625	0.4346
	pcp2CreERT2;TRPC3fl/fl	MUT	Lobules I-III	1	7	56.6417	0.4364	0.4286
	pcp2CreERT2;TRPC3fl/fl	MUT	Lobules I-III	1	8	75.2069	0.3423	0.3234
	pcp2CreERT2;TRPC3fl/fl	MUT	Lobules I-III	2	9	73.3833	0.3789	0.36
	pcp2CreERT2;TRPC3fl/fl	MUT	Lobules I-III	2	10	59.6	0.3681	0.3513
	pcp2CreERT2;TRPC3fl/fl	MUT	Lobules I-III	2	11	66.2441	0.4139	0.3638
	pcp2CreERT2;TRPC3fl/fl	MUT	Lobules I-III	2	12	65.76	0.3481	0.3275
	pcp2CreERT2;TRPC3fl/fl	MUT	Lobules I-III	2	13	75.37	0.3884	0.3651
	pcp2CreERT2;TRPC3fl/fl	MUT	Lobules I-III	2	14	79.21	0.3642	0.344
	pcp2CreERT2;TRPC3fl/fl	MUT	Lobules I-III	2	15	75.5556	0.3963	0.3911
	pcp2CreERT2;TRPC3fl/fl	MUT	Lobules I-III	2	16	81.7	0.4644	0.3792
	pcp2CreERT2;TRPC3fl/fl	MUT	Lobules I-III	3	17	66.5	0.2885	0.2816
	pcp2CreERT2;TRPC3fl/fl	MUT	Lobules I-III	3	18	57.375	0.3635	0.3134
	pcp2CreERT2;TRPC3fl/fl	MUT	Lobules I-III	3	19	70.4078	0.3647	0.3872
	pcp2CreERT2;TRPC3fl/fl	MUT	Lobules I-III	3	20	86.4516	0.4487	0.4066
	pcp2CreERT2;TRPC3fl/fl	MUT	Lobules I-III	3	21	63.09	0.3746	0.3429
	pcp2CreERT2;TRPC3fl/fl	MUT	Lobules I-III	3	22	59.63	0.4216	0.3863
	pcp2CreERT2;TRPC3fl/fl	MUT	Lobules I-III	4	23	61.6417	0.5881	0.4757
	pcp2CreERT2;TRPC3fl/fl	MUT	Lobules I-III	4	24	76.6545	0.4731	0.4552
	pcp2CreERT2;TRPC3fl/fl	MUT	Lobules I-III	4	25	66.93	0.4183	0.4206
	pcp2CreERT2;TRPC3fl/fl	MUT	Lobules I-III	4	26	71.2667	0.3517	0.3949
	pcp2CreERT2;TRPC3fl/fl	MUT	Lobules I-III	4	27	83.3111	0.387	0.4091
	pcp2CreERT2;TRPC3fl/fl	MUT	Lobules I-III	4	28	78.6333	0.3593	0.3829
	pcp2CreERT2;TRPC3fl/fl	MUT	Lobules I-III	4	29	76.9125	0.435	0.4175
	pcp2CreERT2;TRPC3fl/fl	MUT	Lobules I-III	4	30	73.4571	0.4146	0.3933
	pcp2CreERT2;TRPC3fl/fl	MUT	Lobule X	1	1	46.7931	0.3558	0.3191
	pcp2CreERT2;TRPC3fl/fl	MUT	Lobule X	1	2	47.3433	0.2895	0.2815
	pcp2CreERT2;TRPC3fl/fl	MUT	Lobule X	1	3	38.1916	0.3153	0.2794
	pcp2CreERT2;TRPC3fl/fl	MUT	Lobule X	1	4	46.5375	0.2527	0.2393
	pcp2CreERT2;TRPC3fl/fl	MUT	Lobule X	1	5	74.6775	0.2329	0.2179
	pcp2CreERT2;TRPC3fl/fl	MUT	Lobule X	1	6	34.8868	0.3447	0.3181
	pcp2CreERT2;TRPC3fl/fl	MUT	Lobule X	2	7	44.9217	0.2388	0.241
	pcp2CreERT2;TRPC3fl/fl	MUT	Lobule X	2	8	33.6286	0.3477	0.2991
	pcp2CreERT2;TRPC3fl/fl	MUT	Lobule X	2	9	60.4909	0.3072	0.2875
	pcp2CreERT2;TRPC3fl/fl	MUT	Lobule X	2	10	27.3	0.3875	0.342
	pcp2CreERT2;TRPC3fl/fl	MUT	Lobule X	2	11	56.1167	0.4131	0.269
	pcp2CreERT2;TRPC3fl/fl	MUT	Lobule X	2	12	57.1	0.2522	0.2331
	pcp2CreERT2;TRPC3fl/fl	MUT	Lobule X	3	13	58.4143	0.3165	0.2802
	pcp2CreERT2;TRPC3fl/fl	MUT	Lobule X	3	14	37.7946	0.3547	0.3214
	pcp2CreERT2;TRPC3fl/fl	MUT	Lobule X	3	15	65.3556	0.2953	0.3056
	pcp2CreERT2;TRPC3fl/fl	MUT	Lobule X	3	16	48.675	0.2976	0.2556
	pcp2CreERT2;TRPC3fl/fl	MUT	Lobule X	3	17	45.2727	0.4409	0.3403
	pcp2CreERT2;TRPC3fl/fl	MUT	Lobule X	3	18	44.6778	0.327	0.2868
	pcp2CreERT2;TRPC3fl/fl	MUT	Lobule X	3	19	40.823	0.3721	0.315
	pcp2CreERT2;TRPC3fl/fl	MUT	Lobule X	4	20	42.6396	0.3037	0.2819
	pcp2CreERT2;TRPC3fl/fl	MUT	Lobule X	4	21	43.25	0.3398	0.3138
	pcp2CreERT2;TRPC3fl/fl	MUT	Lobule X	4	22	33.0842	0.3744	0.3052
	pcp2CreERT2;TRPC3fl/fl	MUT	Lobule X	4	23	29.964	0.4266	0.3685
	pcp2CreERT2;TRPC3fl/fl	MUT	Lobule X	4	24	55.8525	0.3789	0.3366
	pcp2CreERT2;TRPC3fl/fl	MUT	Lobule X	4	25	33.0778	0.4431	0.3429
	pcp2CreERT2;TRPC3fl/fl	MUT	Lobule X	4	26	61.85	0.2583	0.2782
	pcp2CreERT2;TRPC3fl/fl	MUT	Lobule X	4	27	57.5857	0.275	0.2594
	pcp2CreERT2;TRPC3fl/fl	MUT	Lobule X	4	28	41.34	0.3846	0.2857
	pcp2CreERT2;TRPC3fl/fl	MUT	Lobule X	4	29	55.9833	0.3323	0.2855
	average over cells
	pcp2Cre;TRPC3fl/fl;EAAT4GFP/-	WT	Lobules I-III	mean		72.6481	0.43635	0.337464
				sd		26.4706	0.0969231	0.11733
			Lobule X	mean		33.0477	0.560618	0.385436
				sd		9.80267	0.255607	0.114194
		MUT	Lobules I-III	mean		36.5228	0.550462	0.44085
				sd		23.1867	0.164144	0.115065
			Lobule X	mean		36.6439	0.473233	0.405642
				sd		19.5256	0.224511	0.168473
	pcp2CreERT2;TRPC3fl/fl	WT	Lobules I-III	mean		86.452	0.403228	0.377836
				sd		10.8457	0.0617381	0.0524522
			Lobule X	mean		51.557	0.314665	0.293347
				sd		13.4306	0.0491944	0.0523477
		MUT	Lobules I-III	mean		72.8842	0.399833	0.38078
				sd		9.08301	0.0668542	0.0469688
			Lobule X	mean		47.0216	0.333041	0.292745
				sd		11.5956	0.0594141	0.0363651
	average per mouse, averaged over mice
	pcp2Cre;TRPC3fl/fl;EAAT4GFP/-	WT	Lobules I-III	mean		69.7687	0.435563	0.342508
				sd		9.50162	0.00259862	0.0166418
			Lobule X	mean		32.4882	0.577545	0.392212
				sd		8.70443	0.263319	0.105399
		MUT	Lobules I-III	mean		49.9806	0.508394	0.408024
				sd		21.8284	0.110894	0.104871
			Lobule X	mean		38.7012	0.501306	0.425294
				sd		20.2422	0.138467	0.114261
	pcp2CreERT2;TRPC3fl/fl	WT	Lobules I-III	mean		87.0377	0.399705	0.375397
				sd		5.13617	0.0192156	0.011919
			Lobule X	mean		51.8155	0.315087	0.293709
				sd		7.07933	0.0104879	0.00788738
		MUT	Lobules I-III	mean		72.5316	0.398402	0.379044
				sd		4.11963	0.0218025	0.0295945
			Lobule X	mean		47.2109	0.329503	0.290243
				sd		1.46567	0.0236205	0.0151856

## Sheet: Statistics
	Statistics (T test) for in vivo extracellular recording PCs firing activity
	Mouse line	Location	Statistics	Simple spike
				Spike rate (Hz)	CV	CV2_mean
	pcp2Cre;TRPC3fl/fl;EAAT4GFP/-	Lobules I-III	t-value	3.99	-2.27	-2.43
			df	28	28	28
			P-value	4.4×10^-4	0.031	0.022
		Lobule X	t-value	-0.55	0.873	-0.333
			df	21	21	21
			P-value	0.588	0.393	0.742
	pcp2CreERT2;TRPC3fl/fl	Lobules I-III	t-value	5.05	0.221	-0.222
			df	53	53	53
			P-value	5.6×10^-6	0.826	0.825
		Lobule X	t-value	1.21	-1.09	0.025
			df	44	44	44
			P-value	0.234	0.283	0.98
