# Supplementary material for: TRPC3 is a major contributor to functional heterogeneity of cerebellar Purkinje cells
Source: eLife journal article supplement (doi:10.7554/elife.45590), 2019-09-05
Supplement: supp [file elife-45590-supp-v1.zip › elife_poa_e45590_Figure_5_source_data_1.xlsx]

## Sheet: In vivo recording_complex spike
	In vivo extracellular recording
	Mouse line	Genetype	Location	Mouse nr.	PC nr.	Complex spike
						Spike rate (Hz)	CV	CV2_mean
	TRPC3Mwk/-	WT	Lobules I-III	1	1	2	0.693	0.8736
	TRPC3Mwk/-	WT	Lobules I-III	1	2	1.375	0.85647	0.9302
	TRPC3Mwk/-	WT	Lobules I-III	1	3	1.2795	0.7548	0.774
	TRPC3Mwk/-	WT	Lobules I-III	1	4	0.98507	0.70727	0.72045
	TRPC3Mwk/-	WT	Lobules I-III	1	5	1.6333	0.7674	0.848
	TRPC3Mwk/-	WT	Lobules I-III	1	6	1.1929	0.6829	0.8549
	TRPC3Mwk/-	WT	Lobules I-III	2	7	0.9	0.65976	0.79799
	TRPC3Mwk/-	WT	Lobules I-III	2	8	1.4326	1.0028	1.1115
	TRPC3Mwk/-	WT	Lobules I-III	2	9	1.0696	0.89936	0.7966
	TRPC3Mwk/-	WT	Lobules I-III	2	10	0.97441	0.77639	0.89596
	TRPC3Mwk/-	WT	Lobules I-III	2	11	0.9	0.6357	0.8059
	TRPC3Mwk/-	WT	Lobules I-III	2	12	1.0674	0.7816	0.8218
	TRPC3Mwk/-	WT	Lobules I-III	3	13	1.02	1.2987	0.90496
	TRPC3Mwk/-	WT	Lobules I-III	3	14	1.7721	0.60304	0.74633
	TRPC3Mwk/-	WT	Lobules I-III	3	15	1.6667	0.73915	0.81433
	TRPC3Mwk/-	WT	Lobules I-III	3	16	1.75	0.6788	0.7679
	TRPC3Mwk/-	WT	Lobules I-III	3	17	0.8	0.78631	0.69529
	TRPC3Mwk/-	WT	Lobules I-III	3	18	0.8	0.78631	0.69529
	TRPC3Mwk/-	WT	Lobules I-III	4	19	1.1094	0.6371	0.80996
	TRPC3Mwk/-	WT	Lobules I-III	4	20	1.5	0.65639	0.75856
	TRPC3Mwk/-	WT	Lobules I-III	4	21	1.1356	0.51394	0.61998
	TRPC3Mwk/-	WT	Lobules I-III	4	22	1.2111	0.79481	0.8418
	TRPC3Mwk/-	WT	Lobules I-III	4	23	1.0111	0.5686	0.794
	TRPC3Mwk/-	WT	Lobules I-III	4	24	1.5917	0.7484	0.8466
	TRPC3Mwk/-	WT	Lobules I-III	4	25	0.9	0.7749	0.8513
	TRPC3Mwk/-	WT	Lobules I-III	5	26	1	0.6732	0.8591
	TRPC3Mwk/-	WT	Lobules I-III	5	27	1.5444	0.6403	0.8381
	TRPC3Mwk/-	WT	Lobules I-III	5	28	1.1008	0.6834	0.8208
	TRPC3Mwk/-	WT	Lobules I-III	5	29	1.575	0.8096	1.073
	TRPC3Mwk/-	WT	Lobules I-III	5	30	1.175	0.7807	0.8918
	TRPC3Mwk/-	WT	Lobules I-III	5	31	0.44	0.9429	0.8045
	TRPC3Mwk/-	WT	Lobules I-III	5	32	1.2333	0.6639	0.7228
	TRPC3Mwk/-	WT	Lobules I-III	5	33	1.4714	0.7984	0.8927
	TRPC3Mwk/-	WT	Lobules I-III	5	34	0.6552	0.6595	0.7214
	TRPC3Mwk/-	WT	Lobules I-III	6	35	1.0308	0.7003	0.8323
	TRPC3Mwk/-	WT	Lobules I-III	6	36	0.6158	0.9876	1.0171
	TRPC3Mwk/-	WT	Lobules I-III	6	37	0.6	0.7813	0.8003
	TRPC3Mwk/-	WT	Lobules I-III	6	38	1.425	0.7204	0.8841
	TRPC3Mwk/-	WT	Lobules I-III	6	39	0.5	0.9941	0.869
	TRPC3Mwk/-	WT	Lobules I-III	6	40	0.9909	0.7965	0.7013
	TRPC3Mwk/-	WT	Lobule X	1	1	0.6375	0.7846	0.7819
	TRPC3Mwk/-	WT	Lobule X	1	2	0.4113	0.6836	0.772
	TRPC3Mwk/-	WT	Lobule X	1	3	0.6125	0.5176	0.6486
	TRPC3Mwk/-	WT	Lobule X	1	4	0.7534	0.6224	0.7233
	TRPC3Mwk/-	WT	Lobule X	1	5	0.42	0.6945	0.7516
	TRPC3Mwk/-	WT	Lobule X	2	6	1.0714	0.6808	0.8239
	TRPC3Mwk/-	WT	Lobule X	2	7	0.7143	0.5605	0.5993
	TRPC3Mwk/-	WT	Lobule X	2	8	0.92308	0.52142	0.62705
	TRPC3Mwk/-	WT	Lobule X	2	9	0.5667	0.8356	0.8497
	TRPC3Mwk/-	WT	Lobule X	2	10	1.5503	0.59335	0.70794
	TRPC3Mwk/-	WT	Lobule X	2	11	1.1029	0.634	0.7361
	TRPC3Mwk/-	WT	Lobule X	2	12	0.75	0.70991	0.75948
	TRPC3Mwk/-	WT	Lobule X	3	13	0.70956	0.97159	0.8466
	TRPC3Mwk/-	WT	Lobule X	3	14	0.76667	0.62099	0.70164
	TRPC3Mwk/-	WT	Lobule X	3	15	0.75214	0.68328	0.66972
	TRPC3Mwk/-	WT	Lobule X	3	16	0.675	0.53935	0.55408
	TRPC3Mwk/-	WT	Lobule X	4	17	0.99	0.7935	0.7128
	TRPC3Mwk/-	WT	Lobule X	4	18	1.2769	0.6902	0.6507
	TRPC3Mwk/-	WT	Lobule X	4	19	0.7131	0.8422	0.8967
	TRPC3Mwk/-	WT	Lobule X	4	20	0.8857	0.9491	0.926
	TRPC3Mwk/-	WT	Lobule X	4	21	1.1765	0.9352	0.8591
	TRPC3Mwk/-	WT	Lobule X	5	22	1.0659	0.6037	0.7171
	TRPC3Mwk/-	WT	Lobule X	5	23	0.9111	0.7373	0.8883
	TRPC3Mwk/-	WT	Lobule X	5	24	0.88	0.6729	0.7693
	TRPC3Mwk/-	MUT	Lobules I-III	1	1	1.08	0.7572	0.8212
	TRPC3Mwk/-	MUT	Lobules I-III	1	2	0.6625	0.7179	0.7365
	TRPC3Mwk/-	MUT	Lobules I-III	1	3	0.3333	1.1591	0.8841
	TRPC3Mwk/-	MUT	Lobules I-III	1	4	0.8375	0.9403	0.9224
	TRPC3Mwk/-	MUT	Lobules I-III	1	5	0.8429	1.0297	1.0882
	TRPC3Mwk/-	MUT	Lobules I-III	2	6	1.042	0.71652	0.83874
	TRPC3Mwk/-	MUT	Lobules I-III	2	7	1.1987	0.81131	0.71929
	TRPC3Mwk/-	MUT	Lobules I-III	2	8	1.1433	0.81725	0.78343
	TRPC3Mwk/-	MUT	Lobules I-III	2	9	0.875	0.87315	0.85421
	TRPC3Mwk/-	MUT	Lobules I-III	2	10	0.74747	1.1384	0.82036
	TRPC3Mwk/-	MUT	Lobules I-III	2	11	1.0077	0.78378	0.82893
	TRPC3Mwk/-	MUT	Lobules I-III	3	12	1.2867	0.9058	0.8877
	TRPC3Mwk/-	MUT	Lobules I-III	3	13	0.7241	1.4139	0.7416
	TRPC3Mwk/-	MUT	Lobules I-III	3	14	0.4923	0.9536	0.8611
	TRPC3Mwk/-	MUT	Lobules I-III	4	15	0.8143	0.7573	0.8215
	TRPC3Mwk/-	MUT	Lobules I-III	4	16	1.2389	0.9197	0.7722
	TRPC3Mwk/-	MUT	Lobules I-III	4	17	0.871	1.0818	0.7914
	TRPC3Mwk/-	MUT	Lobules I-III	4	18	0.86	0.7824	0.8364
	TRPC3Mwk/-	MUT	Lobules I-III	4	19	0.86	0.838	0.821
	TRPC3Mwk/-	MUT	Lobules I-III	4	20	1.1	0.8463	0.7256
	TRPC3Mwk/-	MUT	Lobules I-III	4	21	0.7486	0.8851	0.8694
	TRPC3Mwk/-	MUT	Lobules I-III	5	22	1.12	0.8769	0.8006
	TRPC3Mwk/-	MUT	Lobules I-III	5	23	1.3	0.6923	0.7611
	TRPC3Mwk/-	MUT	Lobules I-III	5	24	0.98	0.7886	0.7891
	TRPC3Mwk/-	MUT	Lobules I-III	5	25	0.9311	0.8435	0.8374
	TRPC3Mwk/-	MUT	Lobules I-III	5	26	0.8681	0.8487	0.7821
	TRPC3Mwk/-	MUT	Lobules I-III	5	27	1.1857	0.7449	0.8225
	TRPC3Mwk/-	MUT	Lobules I-III	5	28	0.7884	0.9188	0.887
	TRPC3Mwk/-	MUT	Lobules I-III	6	29	0.8714	0.6945	0.7226
	TRPC3Mwk/-	MUT	Lobules I-III	6	30	1.3126	0.7956	0.6275
	TRPC3Mwk/-	MUT	Lobules I-III	6	31	1.1094	0.8816	0.9061
	TRPC3Mwk/-	MUT	Lobules I-III	7	32	0.8525	0.8541	0.6774
	TRPC3Mwk/-	MUT	Lobules I-III	7	33	0.9329	1.0849	0.82
	TRPC3Mwk/-	MUT	Lobules I-III	7	34	1.08	1.0123	0.8229
	TRPC3Mwk/-	MUT	Lobules I-III	7	35	1.3167	0.8639	0.6686
	TRPC3Mwk/-	MUT	Lobules I-III	7	36	1.5125	0.8156	0.7938
	TRPC3Mwk/-	MUT	Lobule X	1	1	0.6531	0.7463	0.7929
	TRPC3Mwk/-	MUT	Lobule X	1	2	0.6596	0.7286	0.7284
	TRPC3Mwk/-	MUT	Lobule X	2	3	0.38119	1.3023	0.82428
	TRPC3Mwk/-	MUT	Lobule X	2	4	0.40378	0.81479	0.68996
	TRPC3Mwk/-	MUT	Lobule X	3	5	0.775	0.875	0.8397
	TRPC3Mwk/-	MUT	Lobule X	3	6	0.875	0.5032	0.543
	TRPC3Mwk/-	MUT	Lobule X	3	7	0.7955	0.7361	0.6272
	TRPC3Mwk/-	MUT	Lobule X	3	8	1.5932	0.5854	0.5907
	TRPC3Mwk/-	MUT	Lobule X	4	9	0.6093	1.0748	0.7017
	TRPC3Mwk/-	MUT	Lobule X	4	10	1.0897	0.5593	0.6234
	TRPC3Mwk/-	MUT	Lobule X	4	11	0.7111	1.2988	0.9244
	TRPC3Mwk/-	MUT	Lobule X	4	12	1.125	0.7179	0.7527
	TRPC3Mwk/-	MUT	Lobule X	5	13	0.2903	1.1116	0.7886
	TRPC3Mwk/-	MUT	Lobule X	5	14	0.8909	0.959	0.811
	TRPC3Mwk/-	MUT	Lobule X	6	15	0.8317	1.0595	0.7335
	TRPC3Mwk/-	MUT	Lobule X	6	16	0.3833	0.866	0.7676
	TRPC3Mwk/-	MUT	Lobule X	6	17	0.4232	0.4801	0.4169
	TRPC3Mwk/-	MUT	Lobule X	6	18	0.54	0.7279	0.8182
	TRPC3Mwk/-	MUT	Lobule X	6	19	0.2262	1.1563	0.8428
	TRPC3Mwk/-	MUT	Lobule X	6	20	0.8667	1.3508	0.8682
	pcp2Cre;TRPC3fl/fl	WT	Lobules I-III	1	1	1.6333	0.6836	0.7674
	pcp2Cre;TRPC3fl/fl	WT	Lobules I-III	1	2	1.6667	0.6638	0.7884
	pcp2Cre;TRPC3fl/fl	WT	Lobules I-III	2	3	1.3833	0.74866	1.0095
	pcp2Cre;TRPC3fl/fl	WT	Lobules I-III	3	4	1.3833	0.75595	0.84565
	pcp2Cre;TRPC3fl/fl	WT	Lobules I-III	3	5	1.375	0.76992	0.81087
	pcp2Cre;TRPC3fl/fl	WT	Lobules I-III	3	6	0.6463	0.8517	0.8491
	pcp2Cre;TRPC3fl/fl	WT	Lobules I-III	4	7	1.1889	0.54949	0.66309
	pcp2Cre;TRPC3fl/fl	WT	Lobules I-III	4	8	1.8571	1.0411	0.90375
	pcp2Cre;TRPC3fl/fl	WT	Lobules I-III	4	9	1.4	0.73768	0.76572
	pcp2Cre;TRPC3fl/fl	WT	Lobules I-III	4	10	1.4444	0.77194	0.84931
	pcp2Cre;TRPC3fl/fl	WT	Lobules I-III	4	11	1.15	1.0519	0.79029
	pcp2Cre;TRPC3fl/fl	WT	Lobules I-III	5	12	1.4809	0.70316	0.76329
	pcp2Cre;TRPC3fl/fl	WT	Lobules I-III	5	13	1.8143	0.6671	0.8526
	pcp2Cre;TRPC3fl/fl	WT	Lobules I-III	5	14	1.8333	0.78012	0.81673
	pcp2Cre;TRPC3fl/fl	WT	Lobules I-III	5	15	1.7143	0.704	0.7901
	pcp2Cre;TRPC3fl/fl	WT	Lobules I-III	5	16	1.8483	0.7828	0.822
	pcp2Cre;TRPC3fl/fl	WT	Lobules I-III	5	17	1.538	0.7992	0.8787
	pcp2Cre;TRPC3fl/fl	WT	Lobules I-III	6	18	1.1125	0.6752	0.8158
	pcp2Cre;TRPC3fl/fl	WT	Lobules I-III	7	19	1.24	0.6811	0.8823
	pcp2Cre;TRPC3fl/fl	WT	Lobules I-III	7	20	0.9	0.7477	0.811
	pcp2Cre;TRPC3fl/fl	WT	Lobules I-III	8	21	1.65	0.72168	0.84112
	pcp2Cre;TRPC3fl/fl	WT	Lobules I-III	8	22	1.658	0.716	0.7384
	pcp2Cre;TRPC3fl/fl	WT	Lobules I-III	8	23	1.4571	0.7115	0.7787
	pcp2Cre;TRPC3fl/fl	WT	Lobules I-III	8	24	0.7429	0.736	0.8089
	pcp2Cre;TRPC3fl/fl	WT	Lobules I-III	8	25	1.6389	0.6762	0.8706
	pcp2Cre;TRPC3fl/fl	WT	Lobules I-III	8	26	0.819	0.6883	0.7111
	pcp2Cre;TRPC3fl/fl	WT	Lobule X	1	1	1	0.6862	0.8492
	pcp2Cre;TRPC3fl/fl	WT	Lobule X	1	2	0.7	0.58854	0.74333
	pcp2Cre;TRPC3fl/fl	WT	Lobule X	1	3	1.3667	0.56732	0.77869
	pcp2Cre;TRPC3fl/fl	WT	Lobule X	1	4	1.2143	0.7462	0.8709
	pcp2Cre;TRPC3fl/fl	WT	Lobule X	2	5	0.95789	0.54064	0.70609
	pcp2Cre;TRPC3fl/fl	WT	Lobule X	2	6	0.56087	1.0936	0.87358
	pcp2Cre;TRPC3fl/fl	WT	Lobule X	3	7	1.08	0.72336	0.78505
	pcp2Cre;TRPC3fl/fl	WT	Lobule X	3	8	0.92857	0.65124	0.67534
	pcp2Cre;TRPC3fl/fl	WT	Lobule X	3	9	1.875	0.60339	0.70506
	pcp2Cre;TRPC3fl/fl	WT	Lobule X	3	10	1.37	0.62425	0.77157
	pcp2Cre;TRPC3fl/fl	WT	Lobule X	3	11	1.1136	0.65601	0.80093
	pcp2Cre;TRPC3fl/fl	WT	Lobule X	3	12	0.89059	0.62783	0.80626
	pcp2Cre;TRPC3fl/fl	WT	Lobule X	3	13	0.65756	0.96148	0.66535
	pcp2Cre;TRPC3fl/fl	WT	Lobule X	4	14	1.6571	0.6895	0.8822
	pcp2Cre;TRPC3fl/fl	WT	Lobule X	4	15	1.15	0.6075	0.7108
	pcp2Cre;TRPC3fl/fl	WT	Lobule X	4	16	0.8421	0.666	0.8522
	pcp2Cre;TRPC3fl/fl	WT	Lobule X	4	17	0.8841	0.6713	0.6919
	pcp2Cre;TRPC3fl/fl	WT	Lobule X	4	18	0.7875	0.4657	0.5743
	pcp2Cre;TRPC3fl/fl	WT	Lobule X	5	19	0.6456	0.6132	0.6423
	pcp2Cre;TRPC3fl/fl	WT	Lobule X	5	20	1.0571	0.6617	0.8793
	pcp2Cre;TRPC3fl/fl	WT	Lobule X	6	21	0.7	0.6745	0.7277
	pcp2Cre;TRPC3fl/fl	WT	Lobule X	6	22	0.5667	0.5702	0.6013
	pcp2Cre;TRPC3fl/fl	WT	Lobule X	6	23	0.9389	0.6964	0.8587
	pcp2Cre;TRPC3fl/fl	WT	Lobule X	6	24	0.625	0.7758	0.927
	pcp2Cre;TRPC3fl/fl	MUT	Lobules I-III	1	1	0.95	0.8664	0.7208
	pcp2Cre;TRPC3fl/fl	MUT	Lobules I-III	1	2	1.9556	0.7933	0.9279
	pcp2Cre;TRPC3fl/fl	MUT	Lobules I-III	1	3	1.5438	0.7483	0.8548
	pcp2Cre;TRPC3fl/fl	MUT	Lobules I-III	1	4	1.2286	0.7164	0.8589
	pcp2Cre;TRPC3fl/fl	MUT	Lobules I-III	1	5	1.3417	0.675	0.7376
	pcp2Cre;TRPC3fl/fl	MUT	Lobules I-III	2	6	1.4022	0.7343	0.9169
	pcp2Cre;TRPC3fl/fl	MUT	Lobules I-III	2	7	1.31	0.7677	0.8201
	pcp2Cre;TRPC3fl/fl	MUT	Lobules I-III	2	8	1.1647	0.9571	0.9692
	pcp2Cre;TRPC3fl/fl	MUT	Lobules I-III	2	9	1.55	0.8636	0.9679
	pcp2Cre;TRPC3fl/fl	MUT	Lobules I-III	3	10	0.7	0.8362	0.8608
	pcp2Cre;TRPC3fl/fl	MUT	Lobules I-III	4	11	1.56	0.70332	0.82248
	pcp2Cre;TRPC3fl/fl	MUT	Lobules I-III	4	12	1.845	0.72901	0.88189
	pcp2Cre;TRPC3fl/fl	MUT	Lobules I-III	4	13	1.2875	0.69883	0.80207
	pcp2Cre;TRPC3fl/fl	MUT	Lobules I-III	4	14	1.3049	0.82556	0.87259
	pcp2Cre;TRPC3fl/fl	MUT	Lobules I-III	4	15	1.5917	0.88206	0.87606
	pcp2Cre;TRPC3fl/fl	MUT	Lobules I-III	4	16	0.7	0.75068	0.78007
	pcp2Cre;TRPC3fl/fl	MUT	Lobules I-III	4	17	0.9	0.68423	0.81306
	pcp2Cre;TRPC3fl/fl	MUT	Lobules I-III	4	18	0.7161	0.86322	0.84374
	pcp2Cre;TRPC3fl/fl	MUT	Lobules I-III	4	19	0.825	0.5519	0.69988
	pcp2Cre;TRPC3fl/fl	MUT	Lobules I-III	5	20	0.5143	0.6283	0.6052
	pcp2Cre;TRPC3fl/fl	MUT	Lobules I-III	6	21	0.8	0.82263	0.79183
	pcp2Cre;TRPC3fl/fl	MUT	Lobules I-III	6	22	1.4286	0.85071	0.90686
	pcp2Cre;TRPC3fl/fl	MUT	Lobules I-III	6	23	1.1111	0.77004	0.79146
	pcp2Cre;TRPC3fl/fl	MUT	Lobules I-III	6	24	0.99328	0.67497	0.76288
	pcp2Cre;TRPC3fl/fl	MUT	Lobules I-III	7	25	1.125	0.69757	0.79536
	pcp2Cre;TRPC3fl/fl	MUT	Lobules I-III	7	26	0.48333	0.76386	0.64765
	pcp2Cre;TRPC3fl/fl	MUT	Lobules I-III	7	27	1.4	0.71602	0.88604
	pcp2Cre;TRPC3fl/fl	MUT	Lobules I-III	7	28	1.521	0.7028	0.7481
	pcp2Cre;TRPC3fl/fl	MUT	Lobules I-III	7	29	0.8538	0.5909	0.7443
	pcp2Cre;TRPC3fl/fl	MUT	Lobules I-III	7	30	0.6824	0.7091	0.8518
	pcp2Cre;TRPC3fl/fl	MUT	Lobule X	1	1	0.81667	1.0522	0.89025
	pcp2Cre;TRPC3fl/fl	MUT	Lobule X	1	2	0.9339	0.7141	0.7274
	pcp2Cre;TRPC3fl/fl	MUT	Lobule X	2	3	0.84286	0.61798	0.72976
	pcp2Cre;TRPC3fl/fl	MUT	Lobule X	2	4	1.0709	0.6543	0.7929
	pcp2Cre;TRPC3fl/fl	MUT	Lobule X	2	5	0.84127	0.58507	0.78218
	pcp2Cre;TRPC3fl/fl	MUT	Lobule X	2	6	1.1429	0.58181	0.73528
	pcp2Cre;TRPC3fl/fl	MUT	Lobule X	2	7	0.4	0.88283	0.86412
	pcp2Cre;TRPC3fl/fl	MUT	Lobule X	2	8	1.3143	0.70285	0.79773
	pcp2Cre;TRPC3fl/fl	MUT	Lobule X	2	9	0.50551	0.5832	0.69012
	pcp2Cre;TRPC3fl/fl	MUT	Lobule X	3	10	0.6125	0.9402	0.692
	pcp2Cre;TRPC3fl/fl	MUT	Lobule X	3	11	0.2167	0.7689	0.6732
	pcp2Cre;TRPC3fl/fl	MUT	Lobule X	3	12	0.5755	0.6796	0.9376
	pcp2Cre;TRPC3fl/fl	MUT	Lobule X	3	13	0.425	0.9961	1.039
	pcp2Cre;TRPC3fl/fl	MUT	Lobule X	3	14	0.6286	0.7415	0.8671
	pcp2Cre;TRPC3fl/fl	MUT	Lobule X	3	15	0.94	0.70709	0.83541
	pcp2Cre;TRPC3fl/fl	MUT	Lobule X	4	16	0.68889	0.73363	0.80521
	pcp2Cre;TRPC3fl/fl	MUT	Lobule X	4	17	0.69109	0.85226	0.74948
	pcp2Cre;TRPC3fl/fl	MUT	Lobule X	4	18	0.74051	0.6215	0.71485
	pcp2Cre;TRPC3fl/fl	MUT	Lobule X	4	19	0.6875	0.54821	0.6573
	pcp2Cre;TRPC3fl/fl	MUT	Lobule X	4	20	1.1047	0.59156	0.70479
	pcp2Cre;TRPC3fl/fl	MUT	Lobule X	4	21	0.8	0.6493	0.7084
	pcp2Cre;TRPC3fl/fl	MUT	Lobule X	5	22	1.0333	0.787	0.8966
	pcp2Cre;TRPC3fl/fl	MUT	Lobule X	6	23	0.69	0.7872	0.9627
	pcp2Cre;TRPC3fl/fl	MUT	Lobule X	6	24	0.5143	0.6434	0.5595
	pcp2Cre;TRPC3fl/fl	MUT	Lobule X	6	25	0.68	0.7058	0.7818
	pcp2Cre;TRPC3fl/fl	MUT	Lobule X	6	26	0.95	0.6067	0.6165
	pcp2Cre;TRPC3fl/fl	MUT	Lobule X	6	27	0.88333	0.75131	0.76395
	pcp2Cre;TRPC3fl/fl	MUT	Lobule X	7	28	1.4941	0.6165	0.7344
	pcp2Cre;TRPC3fl/fl	MUT	Lobule X	7	29	0.57	0.5793	0.7219
	pcp2Cre;TRPC3fl/fl	MUT	Lobule X	7	30	1.4444	0.7384	0.9791
	pcp2Cre;TRPC3fl/fl	MUT	Lobule X	7	31	1.9167	0.80438	0.81142
	pcp2Cre;TRPC3fl/fl	MUT	Lobule X	8	32	1.1	0.65106	0.77953
	pcp2Cre;TRPC3fl/fl;EAAT4GFP/-	WT	Lobules I-III	1	1	1.025	0.6148	0.7803
	pcp2Cre;TRPC3fl/fl;EAAT4GFP/-	WT	Lobules I-III	1	2	1.8846	0.7652	0.8343
	pcp2Cre;TRPC3fl/fl;EAAT4GFP/-	WT	Lobules I-III	1	3	1.3625	0.7621	0.8486
	pcp2Cre;TRPC3fl/fl;EAAT4GFP/-	WT	Lobules I-III	1	4	1.5244	0.7102	0.8379
	pcp2Cre;TRPC3fl/fl;EAAT4GFP/-	WT	Lobules I-III	1	5	0.9751	0.652	0.763
	pcp2Cre;TRPC3fl/fl;EAAT4GFP/-	WT	Lobules I-III	1	6	1.06	0.7455	0.9024
	pcp2Cre;TRPC3fl/fl;EAAT4GFP/-	WT	Lobules I-III	1	7	1.7133	0.779	0.9106
	pcp2Cre;TRPC3fl/fl;EAAT4GFP/-	WT	Lobules I-III	1	8	1.1058	0.8611	0.9747
	pcp2Cre;TRPC3fl/fl;EAAT4GFP/-	WT	Lobules I-III	1	9	1.3571	0.6872	0.781
	pcp2Cre;TRPC3fl/fl;EAAT4GFP/-	WT	Lobules I-III	1	10	1.2997	0.7796	0.884
	pcp2Cre;TRPC3fl/fl;EAAT4GFP/-	WT	Lobules I-III	2	11	0.9125	0.7048	0.8134
	pcp2Cre;TRPC3fl/fl;EAAT4GFP/-	WT	Lobules I-III	2	12	0.9235	0.7008	0.9831
	pcp2Cre;TRPC3fl/fl;EAAT4GFP/-	WT	Lobules I-III	2	13	0.658	1.0097	0.8388
	pcp2Cre;TRPC3fl/fl;EAAT4GFP/-	WT	Lobules I-III	2	14	0.7058	0.5754	0.745
	pcp2Cre;TRPC3fl/fl;EAAT4GFP/-	WT	Lobule X	1	1	0.5795	0.7878	0.8237
	pcp2Cre;TRPC3fl/fl;EAAT4GFP/-	WT	Lobule X	1	2	1.1594	0.6207	0.745
	pcp2Cre;TRPC3fl/fl;EAAT4GFP/-	WT	Lobule X	1	3	0.7875	0.6684	0.7112
	pcp2Cre;TRPC3fl/fl;EAAT4GFP/-	WT	Lobule X	1	4	1.046	0.685	0.8547
	pcp2Cre;TRPC3fl/fl;EAAT4GFP/-	WT	Lobule X	1	5	0.9667	0.6977	0.7532
	pcp2Cre;TRPC3fl/fl;EAAT4GFP/-	WT	Lobule X	1	6	0.978	0.7767	0.744
	pcp2Cre;TRPC3fl/fl;EAAT4GFP/-	WT	Lobule X	2	7	1.0851	0.7408	0.8498
	pcp2Cre;TRPC3fl/fl;EAAT4GFP/-	WT	Lobule X	2	8	1.12	0.6542	0.7505
	pcp2Cre;TRPC3fl/fl;EAAT4GFP/-	WT	Lobule X	2	9	1.225	0.6623	0.8264
	pcp2Cre;TRPC3fl/fl;EAAT4GFP/-	WT	Lobule X	2	10	1.25	0.6767	0.8033
	pcp2Cre;TRPC3fl/fl;EAAT4GFP/-	WT	Lobule X	2	11	1.0467	0.7326	0.9259
	pcp2Cre;TRPC3fl/fl;EAAT4GFP/-	MUT	Lobules I-III	1	1	0.406	1.0833	0.9051
	pcp2Cre;TRPC3fl/fl;EAAT4GFP/-	MUT	Lobules I-III	1	2	0.4898	0.7024	0.8296
	pcp2Cre;TRPC3fl/fl;EAAT4GFP/-	MUT	Lobules I-III	2	3	0.701	0.6754	0.8462
	pcp2Cre;TRPC3fl/fl;EAAT4GFP/-	MUT	Lobules I-III	2	4	0.4454	1.1715	0.944
	pcp2Cre;TRPC3fl/fl;EAAT4GFP/-	MUT	Lobules I-III	2	5	0.7518	0.7352	0.7696
	pcp2Cre;TRPC3fl/fl;EAAT4GFP/-	MUT	Lobules I-III	3	6	0.8167	0.9369	0.9483
	pcp2Cre;TRPC3fl/fl;EAAT4GFP/-	MUT	Lobules I-III	3	7	0.9689	0.9054	1.0873
	pcp2Cre;TRPC3fl/fl;EAAT4GFP/-	MUT	Lobules I-III	3	8	0.7662	0.9025	1.0742
	pcp2Cre;TRPC3fl/fl;EAAT4GFP/-	MUT	Lobules I-III	3	9	1.0051	1.1317	1.2654
	pcp2Cre;TRPC3fl/fl;EAAT4GFP/-	MUT	Lobules I-III	3	10	1.0838	0.7547	0.862
	pcp2Cre;TRPC3fl/fl;EAAT4GFP/-	MUT	Lobules I-III	3	11	1.1018	0.7534	0.8674
	pcp2Cre;TRPC3fl/fl;EAAT4GFP/-	MUT	Lobules I-III	3	12	1.011	0.7081	0.9378
	pcp2Cre;TRPC3fl/fl;EAAT4GFP/-	MUT	Lobules I-III	3	13	0.8232	0.8168	0.9217
	pcp2Cre;TRPC3fl/fl;EAAT4GFP/-	MUT	Lobules I-III	3	14	0.6849	0.7859	0.9083
	pcp2Cre;TRPC3fl/fl;EAAT4GFP/-	MUT	Lobules I-III	3	15	0.6904	0.7514	0.9131
	pcp2Cre;TRPC3fl/fl;EAAT4GFP/-	MUT	Lobules I-III	3	16	1.05	0.7233	0.9208
	pcp2Cre;TRPC3fl/fl;EAAT4GFP/-	MUT	Lobule X	1	1	0.9885	0.5765	0.7602
	pcp2Cre;TRPC3fl/fl;EAAT4GFP/-	MUT	Lobule X	1	2	0.5676	0.7752	0.7818
	pcp2Cre;TRPC3fl/fl;EAAT4GFP/-	MUT	Lobule X	2	3	0.6843	0.6581	0.749
	pcp2Cre;TRPC3fl/fl;EAAT4GFP/-	MUT	Lobule X	2	4	0.741126	0.650309	0.780864
	pcp2Cre;TRPC3fl/fl;EAAT4GFP/-	MUT	Lobule X	2	5	0.9	0.7933	0.8673
	pcp2Cre;TRPC3fl/fl;EAAT4GFP/-	MUT	Lobule X	3	6	0.6815	0.633	0.757
	pcp2Cre;TRPC3fl/fl;EAAT4GFP/-	MUT	Lobule X	3	7	0.4371	0.6484	0.8377
	pcp2Cre;TRPC3fl/fl;EAAT4GFP/-	MUT	Lobule X	3	8	0.8538	0.7074	0.9885
	pcp2Cre;TRPC3fl/fl;EAAT4GFP/-	MUT	Lobule X	3	9	0.9511	0.5879	0.7215
	pcp2Cre;TRPC3fl/fl;EAAT4GFP/-	MUT	Lobule X	3	10	1.1111	0.654	0.7513
	pcp2Cre;TRPC3fl/fl;EAAT4GFP/-	MUT	Lobule X	3	11	0.3763	0.421	0.5344
	pcp2Cre;TRPC3fl/fl;EAAT4GFP/-	MUT	Lobule X	3	12	0.6017	0.6986	0.8408
	pcp2CreERT2;TRPC3fl/fl	WT	Lobules I-III	1	1	1.1667	0.8222	0.678
	pcp2CreERT2;TRPC3fl/fl	WT	Lobules I-III	1	2	1.1667	0.8714	0.7657
	pcp2CreERT2;TRPC3fl/fl	WT	Lobules I-III	1	3	1.13	0.6696	0.7993
	pcp2CreERT2;TRPC3fl/fl	WT	Lobules I-III	1	4	0.6778	1.2813	0.9647
	pcp2CreERT2;TRPC3fl/fl	WT	Lobules I-III	1	5	0.825	0.8354	0.8772
	pcp2CreERT2;TRPC3fl/fl	WT	Lobules I-III	1	6	0.88	0.7515	0.8324
	pcp2CreERT2;TRPC3fl/fl	WT	Lobules I-III	2	7	0.7667	0.8542	0.7875
	pcp2CreERT2;TRPC3fl/fl	WT	Lobules I-III	2	8	0.6376	0.7781	0.866
	pcp2CreERT2;TRPC3fl/fl	WT	Lobules I-III	2	9	1.4125	0.6374	0.6757
	pcp2CreERT2;TRPC3fl/fl	WT	Lobules I-III	2	10	0.9333	0.6212	0.699
	pcp2CreERT2;TRPC3fl/fl	WT	Lobules I-III	2	11	1.2476	0.6611	0.7009
	pcp2CreERT2;TRPC3fl/fl	WT	Lobules I-III	2	12	1.325	0.768	0.7142
	pcp2CreERT2;TRPC3fl/fl	WT	Lobules I-III	2	13	0.8778	0.8067	0.8179
	pcp2CreERT2;TRPC3fl/fl	WT	Lobules I-III	3	14	1.3333	0.8307	0.8228
	pcp2CreERT2;TRPC3fl/fl	WT	Lobules I-III	3	15	1.13	0.5959	0.7527
	pcp2CreERT2;TRPC3fl/fl	WT	Lobules I-III	3	16	1.3701	0.6696	0.7096
	pcp2CreERT2;TRPC3fl/fl	WT	Lobules I-III	3	17	1.9	0.6905	0.6534
	pcp2CreERT2;TRPC3fl/fl	WT	Lobules I-III	3	18	1.3333	0.6727	0.6617
	pcp2CreERT2;TRPC3fl/fl	WT	Lobules I-III	3	19	1.4889	0.8268	0.949
	pcp2CreERT2;TRPC3fl/fl	WT	Lobules I-III	3	20	0.9667	1.2034	0.9171
	pcp2CreERT2;TRPC3fl/fl	WT	Lobules I-III	3	21	1.4111	0.7363	0.7807
	pcp2CreERT2;TRPC3fl/fl	WT	Lobules I-III	4	22	1.1174	0.6711	0.7926
	pcp2CreERT2;TRPC3fl/fl	WT	Lobules I-III	4	23	1.1333	0.7309	0.7418
	pcp2CreERT2;TRPC3fl/fl	WT	Lobules I-III	4	24	1.2072	0.737	0.9503
	pcp2CreERT2;TRPC3fl/fl	WT	Lobules I-III	4	25	1.3769	0.7669	0.8714
	pcp2CreERT2;TRPC3fl/fl	WT	Lobule X	1	1	0.6	0.6562	0.6769
	pcp2CreERT2;TRPC3fl/fl	WT	Lobule X	1	2	0.85	0.9627	0.6066
	pcp2CreERT2;TRPC3fl/fl	WT	Lobule X	1	3	0.5429	0.8255	0.7809
	pcp2CreERT2;TRPC3fl/fl	WT	Lobule X	1	4	0.8583	0.6378	0.6078
	pcp2CreERT2;TRPC3fl/fl	WT	Lobule X	1	5	0.78	0.6767	0.7751
	pcp2CreERT2;TRPC3fl/fl	WT	Lobule X	1	6	1.3051	0.4768	0.547
	pcp2CreERT2;TRPC3fl/fl	WT	Lobule X	2	7	0.6719	0.7084	0.7354
	pcp2CreERT2;TRPC3fl/fl	WT	Lobule X	2	8	1.5524	0.6618	0.7265
	pcp2CreERT2;TRPC3fl/fl	WT	Lobule X	2	9	0.9684	0.6198	0.8045
	pcp2CreERT2;TRPC3fl/fl	WT	Lobule X	2	10	1.5	0.5993	0.6543
	pcp2CreERT2;TRPC3fl/fl	WT	Lobule X	2	11	1.069	0.5651	0.6892
	pcp2CreERT2;TRPC3fl/fl	WT	Lobule X	2	12	0.44	0.6971	0.9131
	pcp2CreERT2;TRPC3fl/fl	WT	Lobule X	3	13	1.26	0.7415	0.8124
	pcp2CreERT2;TRPC3fl/fl	WT	Lobule X	3	14	1.0667	0.7458	0.9022
	pcp2CreERT2;TRPC3fl/fl	WT	Lobule X	3	15	1.42	0.7022	0.816
	pcp2CreERT2;TRPC3fl/fl	WT	Lobule X	3	16	0.7	0.5112	0.5861
	pcp2CreERT2;TRPC3fl/fl	WT	Lobule X	3	17	1.1053	0.6698	0.7291
	pcp2CreERT2;TRPC3fl/fl	MUT	Lobules I-III	1	1	0.7167	0.9491	0.7747
	pcp2CreERT2;TRPC3fl/fl	MUT	Lobules I-III	1	2	0.9811	0.7072	0.7977
	pcp2CreERT2;TRPC3fl/fl	MUT	Lobules I-III	1	3	0.928	0.7586	0.8577
	pcp2CreERT2;TRPC3fl/fl	MUT	Lobules I-III	1	4	0.9286	0.796	0.7822
	pcp2CreERT2;TRPC3fl/fl	MUT	Lobules I-III	1	5	1.0571	0.7597	0.7925
	pcp2CreERT2;TRPC3fl/fl	MUT	Lobules I-III	1	6	1.0167	0.8949	0.9188
	pcp2CreERT2;TRPC3fl/fl	MUT	Lobules I-III	1	7	1.8583	0.5849	0.6878
	pcp2CreERT2;TRPC3fl/fl	MUT	Lobules I-III	1	8	1.3966	0.7234	0.7085
	pcp2CreERT2;TRPC3fl/fl	MUT	Lobules I-III	2	9	1.3083	0.686	0.7079
	pcp2CreERT2;TRPC3fl/fl	MUT	Lobules I-III	2	10	1.4375	0.6731	0.7151
	pcp2CreERT2;TRPC3fl/fl	MUT	Lobules I-III	2	11	1.2678	0.6932	0.7267
	pcp2CreERT2;TRPC3fl/fl	MUT	Lobules I-III	2	12	0.97	0.9163	0.9075
	pcp2CreERT2;TRPC3fl/fl	MUT	Lobules I-III	2	13	1.21	0.64	0.6811
	pcp2CreERT2;TRPC3fl/fl	MUT	Lobules I-III	2	14	1.43	0.7372	0.6938
	pcp2CreERT2;TRPC3fl/fl	MUT	Lobules I-III	2	15	1.2556	0.5811	0.7312
	pcp2CreERT2;TRPC3fl/fl	MUT	Lobules I-III	2	16	1.3778	0.6971	0.7682
	pcp2CreERT2;TRPC3fl/fl	MUT	Lobules I-III	3	17	1.47	0.7291	0.8701
	pcp2CreERT2;TRPC3fl/fl	MUT	Lobules I-III	3	18	1.5	0.6748	0.7528
	pcp2CreERT2;TRPC3fl/fl	MUT	Lobules I-III	3	19	1.7754	0.739	0.7769
	pcp2CreERT2;TRPC3fl/fl	MUT	Lobules I-III	3	20	1.4839	0.6866	0.7465
	pcp2CreERT2;TRPC3fl/fl	MUT	Lobules I-III	3	21	1.6	0.7329	0.8095
	pcp2CreERT2;TRPC3fl/fl	MUT	Lobules I-III	3	22	1.71	0.716	0.74
	pcp2CreERT2;TRPC3fl/fl	MUT	Lobules I-III	4	23	0.7	0.7492	0.7596
	pcp2CreERT2;TRPC3fl/fl	MUT	Lobules I-III	4	24	0.7091	0.6973	0.7967
	pcp2CreERT2;TRPC3fl/fl	MUT	Lobules I-III	4	25	1.15	0.7277	0.9911
	pcp2CreERT2;TRPC3fl/fl	MUT	Lobules I-III	4	26	1.0833	0.662	0.7986
	pcp2CreERT2;TRPC3fl/fl	MUT	Lobules I-III	4	27	1.0222	0.6778	0.703
	pcp2CreERT2;TRPC3fl/fl	MUT	Lobules I-III	4	28	1.0556	0.6338	0.7788
	pcp2CreERT2;TRPC3fl/fl	MUT	Lobules I-III	4	29	1.2875	0.7453	0.7566
	pcp2CreERT2;TRPC3fl/fl	MUT	Lobules I-III	4	30	1.1571	0.8778	0.7983
	pcp2CreERT2;TRPC3fl/fl	MUT	Lobule X	1	1	0.8448	0.5921	0.7167
	pcp2CreERT2;TRPC3fl/fl	MUT	Lobule X	1	2	0.8657	0.7822	0.818
	pcp2CreERT2;TRPC3fl/fl	MUT	Lobule X	1	3	0.4031	0.8553	0.8832
	pcp2CreERT2;TRPC3fl/fl	MUT	Lobule X	1	4	0.3875	0.6897	0.7281
	pcp2CreERT2;TRPC3fl/fl	MUT	Lobule X	1	5	0.8781	0.6192	0.5918
	pcp2CreERT2;TRPC3fl/fl	MUT	Lobule X	1	6	0.4777	0.6492	0.6897
	pcp2CreERT2;TRPC3fl/fl	MUT	Lobule X	2	7	1.4261	0.6556	0.7051
	pcp2CreERT2;TRPC3fl/fl	MUT	Lobule X	2	8	1.3714	0.8156	0.8345
	pcp2CreERT2;TRPC3fl/fl	MUT	Lobule X	2	9	1.3545	0.6276	0.7101
	pcp2CreERT2;TRPC3fl/fl	MUT	Lobule X	2	10	0.7333	0.6345	0.7588
	pcp2CreERT2;TRPC3fl/fl	MUT	Lobule X	2	11	1.75	0.7731	0.7683
	pcp2CreERT2;TRPC3fl/fl	MUT	Lobule X	2	12	0.7182	0.6359	0.7498
	pcp2CreERT2;TRPC3fl/fl	MUT	Lobule X	3	13	0.9857	0.6147	0.7437
	pcp2CreERT2;TRPC3fl/fl	MUT	Lobule X	3	14	1.077	0.6496	0.7543
	pcp2CreERT2;TRPC3fl/fl	MUT	Lobule X	3	15	1.0889	0.6455	0.8632
	pcp2CreERT2;TRPC3fl/fl	MUT	Lobule X	3	16	1.3	0.5604	0.6564
	pcp2CreERT2;TRPC3fl/fl	MUT	Lobule X	3	17	1	0.8409	0.8746
	pcp2CreERT2;TRPC3fl/fl	MUT	Lobule X	3	18	1.1444	0.6318	0.8799
	pcp2CreERT2;TRPC3fl/fl	MUT	Lobule X	3	19	1.0822	0.5419	0.6785
	pcp2CreERT2;TRPC3fl/fl	MUT	Lobule X	4	20	0.6363	0.6517	0.7404
	pcp2CreERT2;TRPC3fl/fl	MUT	Lobule X	4	21	0.8167	0.7367	0.9354
	pcp2CreERT2;TRPC3fl/fl	MUT	Lobule X	4	22	0.9368	0.6231	0.6732
	pcp2CreERT2;TRPC3fl/fl	MUT	Lobule X	4	23	0.6675	0.6322	0.6859
	pcp2CreERT2;TRPC3fl/fl	MUT	Lobule X	4	24	0.9661	0.6792	0.8693
	pcp2CreERT2;TRPC3fl/fl	MUT	Lobule X	4	25	0.6111	0.613	0.6914
	pcp2CreERT2;TRPC3fl/fl	MUT	Lobule X	4	26	0.95	0.6701	0.8363
	pcp2CreERT2;TRPC3fl/fl	MUT	Lobule X	4	27	1.0286	0.7131	0.9133
	pcp2CreERT2;TRPC3fl/fl	MUT	Lobule X	4	28	0.95	0.7247	0.7985
	pcp2CreERT2;TRPC3fl/fl	MUT	Lobule X	4	29	0.7333	0.7548	0.8243
	average over cells
	TRPC3Mwk/-	WT	Lobules I-III	mean		1.16088	0.7609	0.827638
				sd		0.369478	0.140823	0.0970873
			Lobule X	mean		0.846498	0.703233	0.748871
				sd		0.267999	0.131273	0.0979074
		MUT	Lobules I-III	mean		0.97021	0.884575	0.809554
				sd		0.244359	0.150115	0.0825904
			Lobule X	mean		0.706188	0.882684	0.734257
				sd		0.328706	0.270336	0.12367
	pcp2Cre;TRPC3fl/fl	WT	Lobules I-III	mean		1.40676	0.746762	0.816324
				sd		0.347179	0.10543	0.0672908
			Lobule X	mean		0.982049	0.673411	0.765794
				sd		0.336362	0.129717	0.0970268
		MUT	Lobules I-III	mean		1.15965	0.752467	0.818607
				sd		0.388012	0.090996	0.0866957
			Lobule X	mean		0.851732	0.714851	0.781296
				sd		0.353138	0.125269	0.107325
	pcp2Cre;TRPC3fl/fl;EAAT4GFP/-	WT	Lobules I-III	mean		1.17909	0.7391	0.849793
				sd		0.361523	0.106914	0.0738565
			Lobule X	mean		1.02217	0.700264	0.798882
				sd		0.19561	0.0528181	0.0642384
		MUT	Lobules I-III	mean		0.79975	0.846119	0.93755
				sd		0.225947	0.160264	0.118494
			Lobule X	mean		0.741182	0.650309	0.780864
				sd		0.237058	0.10195	0.111607
	pcp2CreERT2;TRPC3fl/fl	WT	Lobules I-III	mean		1.1526	0.779596	0.791264
				sd		0.288179	0.159608	0.0946306
			Lobule X	mean		0.981765	0.673982	0.727241
				sd		0.342696	0.113494	0.106661
		MUT	Lobules I-III	mean		1.22814	0.728237	0.777663
				sd		0.305608	0.0872492	0.0724858
			Lobule X	mean		0.937414	0.676324	0.771472
				sd		0.313235	0.0798304	0.0873578
	average per mouse, averaged over mice
	TRPC3Mwk/-	WT	Lobules I-III	mean		1.1619	0.765225	0.827089
				sd		0.193053	0.0592783	0.0390498
			Lobule X	mean		0.841531	0.705124	0.751637
				sd		0.188143	0.079293	0.0476953
		MUT	Lobules I-III	mean		0.968141	0.89637	0.807639
				sd		0.139608	0.0992811	0.0467037
			Lobule X	mean		0.679678	0.89317	0.743245
				sd		0.22786	0.156213	0.049836
	pcp2Cre;TRPC3fl/fl	WT	Lobules I-III	mean		1.34891	0.735323	0.836441
				sd		0.239636	0.0548914	0.0736277
			Lobule X	mean		0.930592	0.682228	0.771057
				sd		0.180393	0.0713083	0.0269153
		MUT	Lobules I-III	mean		1.03734	0.753507	0.802568
				sd		0.329285	0.073624	0.0975723
			Lobule X	mean		0.916776	0.729334	0.795988
				sd		0.24317	0.0852691	0.056362
	pcp2Cre;TRPC3fl/fl;EAAT4GFP/-	WT	Lobules I-III	mean		1.06535	0.741673	0.848378
				sd		0.375332	0.00848882	0.00467044
			Lobule X	mean		1.03244	0.699685	0.801573
				sd		0.159695	0.00900147	0.0418701
		MUT	Lobules I-III	mean		0.663302	0.862398	0.897972
				sd		0.2322	0.0296388	0.0656147
			Lobule X	mean		0.756426	0.665964	0.78198
				sd		0.0349658	0.0404653	0.0149874
	pcp2CreERT2;TRPC3fl/fl	WT	Lobules I-III	mean		1.1446	0.77725	0.797762
				sd		0.178747	0.0672074	0.0391299
			Lobule X	mean		0.988911	0.673989	0.72957
				sd		0.148961	0.0320168	0.0558271
		MUT	Lobules I-III	mean		1.25075	0.727289	0.777974
				sd		0.250776	0.0305609	0.0251363
			Lobule X	mean		0.948731	0.67722	0.766952
				sd		0.262274	0.0254606	0.025998

## Sheet: CS-SS interaction
	Complex spike - simple spike interaction
	Mouse line	Genetype	Location	Type	PC count	Percentage
	pcp2Cre;TRPC3fl/fl	WT	Lobules I-III	Normal	20	0.769231
	pcp2Cre;TRPC3fl/fl	WT	Lobules I-III	Facilitation	6	0.230769
	pcp2Cre;TRPC3fl/fl	WT	Lobules I-III	Suppression	0	0
	pcp2Cre;TRPC3fl/fl	WT	Lobules I-III	Oscillation	0	0
	pcp2Cre;TRPC3fl/fl	WT	Lobule X	Normal	10	0.416667
	pcp2Cre;TRPC3fl/fl	WT	Lobule X	Facilitation	5	0.208333
	pcp2Cre;TRPC3fl/fl	WT	Lobule X	Suppression	2	0.0833333
	pcp2Cre;TRPC3fl/fl	WT	Lobule X	Oscillation	7	0.291667
	pcp2Cre;TRPC3fl/fl	MUT	Lobules I-III	Normal	19	0.633333
	pcp2Cre;TRPC3fl/fl	MUT	Lobules I-III	Facilitation	6	0.2
	pcp2Cre;TRPC3fl/fl	MUT	Lobules I-III	Suppression	3	0.1
	pcp2Cre;TRPC3fl/fl	MUT	Lobules I-III	Oscillation	2	0.0666667
	pcp2Cre;TRPC3fl/fl	MUT	Lobule X	Normal	12	0.375
	pcp2Cre;TRPC3fl/fl	MUT	Lobule X	Facilitation	5	0.15625
	pcp2Cre;TRPC3fl/fl	MUT	Lobule X	Suppression	6	0.1875
	pcp2Cre;TRPC3fl/fl	MUT	Lobule X	Oscillation	9	0.28125
	TRPC3Mwk/-	WT	Lobules I-III	Normal	30	0.789474
	TRPC3Mwk/-	WT	Lobules I-III	Facilitation	7	0.184211
	TRPC3Mwk/-	WT	Lobules I-III	Suppression	1	0.0263158
	TRPC3Mwk/-	WT	Lobules I-III	Oscillation	0	0
	TRPC3Mwk/-	WT	Lobule X	Normal	9	0.375
	TRPC3Mwk/-	WT	Lobule X	Facilitation	6	0.25
	TRPC3Mwk/-	WT	Lobule X	Suppression	4	0.166667
	TRPC3Mwk/-	WT	Lobule X	Oscillation	5	0.208333
	TRPC3Mwk/-	MUT	Lobules I-III	Normal	17	0.485714
	TRPC3Mwk/-	MUT	Lobules I-III	Facilitation	0	0
	TRPC3Mwk/-	MUT	Lobules I-III	Suppression	18	0.514286
	TRPC3Mwk/-	MUT	Lobules I-III	Oscillation	0	0
	TRPC3Mwk/-	MUT	Lobule X	Normal	5	0.25
	TRPC3Mwk/-	MUT	Lobule X	Facilitation	0	0
	TRPC3Mwk/-	MUT	Lobule X	Suppression	13	0.65
	TRPC3Mwk/-	MUT	Lobule X	Oscillation	2	0.1
	pcp2Cre;TRPC3fl/fl;EAAT4GFP/-	WT	Lobules I-III	Normal	8	0.571429
	pcp2Cre;TRPC3fl/fl;EAAT4GFP/-	WT	Lobules I-III	Facilitation	4	0.285714
	pcp2Cre;TRPC3fl/fl;EAAT4GFP/-	WT	Lobules I-III	Suppression	2	0.142857
	pcp2Cre;TRPC3fl/fl;EAAT4GFP/-	WT	Lobules I-III	Oscillation	0	0
	pcp2Cre;TRPC3fl/fl;EAAT4GFP/-	WT	Lobule X	Normal	6	0.545455
	pcp2Cre;TRPC3fl/fl;EAAT4GFP/-	WT	Lobule X	Facilitation	2	0.181818
	pcp2Cre;TRPC3fl/fl;EAAT4GFP/-	WT	Lobule X	Suppression	2	0.181818
	pcp2Cre;TRPC3fl/fl;EAAT4GFP/-	WT	Lobule X	Oscillation	1	0.0909091
	pcp2Cre;TRPC3fl/fl;EAAT4GFP/-	MUT	Lobules I-III	Normal	5	0.333333
	pcp2Cre;TRPC3fl/fl;EAAT4GFP/-	MUT	Lobules I-III	Facilitation	8	0.533333
	pcp2Cre;TRPC3fl/fl;EAAT4GFP/-	MUT	Lobules I-III	Suppression	1	0.0666667
	pcp2Cre;TRPC3fl/fl;EAAT4GFP/-	MUT	Lobules I-III	Oscillation	1	0.0666667
	pcp2Cre;TRPC3fl/fl;EAAT4GFP/-	MUT	Lobule X	Normal	5	0.454545
	pcp2Cre;TRPC3fl/fl;EAAT4GFP/-	MUT	Lobule X	Facilitation	3	0.272727
	pcp2Cre;TRPC3fl/fl;EAAT4GFP/-	MUT	Lobule X	Suppression	1	0.0909091
	pcp2Cre;TRPC3fl/fl;EAAT4GFP/-	MUT	Lobule X	Oscillation	2	0.181818
	pcp2CreERT2;TRPC3fl/fl	WT	Lobules I-III	Normal	19	0.826087
	pcp2CreERT2;TRPC3fl/fl	WT	Lobules I-III	Facilitation	4	0.173913
	pcp2CreERT2;TRPC3fl/fl	WT	Lobules I-III	Suppression	0	0
	pcp2CreERT2;TRPC3fl/fl	WT	Lobules I-III	Oscillation	0	0
	pcp2CreERT2;TRPC3fl/fl	WT	Lobule X	Normal	7	0.411765
	pcp2CreERT2;TRPC3fl/fl	WT	Lobule X	Facilitation	5	0.294118
	pcp2CreERT2;TRPC3fl/fl	WT	Lobule X	Suppression	2	0.117647
	pcp2CreERT2;TRPC3fl/fl	WT	Lobule X	Oscillation	3	0.176471
	pcp2CreERT2;TRPC3fl/fl	MUT	Lobules I-III	Normal	20	0.714286
	pcp2CreERT2;TRPC3fl/fl	MUT	Lobules I-III	Facilitation	4	0.142857
	pcp2CreERT2;TRPC3fl/fl	MUT	Lobules I-III	Suppression	4	0.142857
	pcp2CreERT2;TRPC3fl/fl	MUT	Lobules I-III	Oscillation	0	0
	pcp2CreERT2;TRPC3fl/fl	MUT	Lobule X	Normal	8	0.275862
	pcp2CreERT2;TRPC3fl/fl	MUT	Lobule X	Facilitation	8	0.275862
	pcp2CreERT2;TRPC3fl/fl	MUT	Lobule X	Suppression	6	0.206897
	pcp2CreERT2;TRPC3fl/fl	MUT	Lobule X	Oscillation	7	0.241379

## Sheet: Statistics
	Statistics (T test) for in vivo extracellular recording PCs firing activity
	Mouse line	Location	Statistics		Complex spike			CF pause
					Spike rate (Hz)	CV	CV2_mean
	TRPC3Mwk/-	Lobules I-III	t-value		2.68	-3.71	0.87	-0.42
			df		68	74	74	51
			P-value		0.009	4.05×10^-4	0.387	0.676
		Lobule X	t-value		1.56	-2.71	0.438	-1.14
			df		42	26	42	28
			P-value		0.126	0.012	0.664	0.263
	pcp2Cre;TRPC3fl/fl	Lobules I-III	t-value		2.5	-0.217	-0.109	-2.33
			df		54	54	54	47
			P-value		0.016	0.829	0.914	0.024
		Lobule X	t-value		1.41	-1.21	-0.557	-1.09
			df		54	54	54	56
			P-valu		0.164	0.233	0.58	0.281
	pcp2Cre;TRPC3fl/fl;EAAT4GFP/-	Lobules I-III	t-value		3.49	-2.12	-2.39	-2.41
			df		28	28	28	18
			P-value		0.002	0.043	0.024	0.027
		Lobule X	t-value		3.03	1.44	0.464	0.216
			df		20	20	20	20
			P-value		0.007	0.165	0.648	0.831
	pcp2CreERT2;TRPC3fl/fl	Lobules I-III	t-value		-0.94	1.51	0.57	-1.83
			df		53	53	53	53
			P-value		0.352	0.136	0.571	0.073
		Lobule X	t-value		0.448	-0.02	-1.5	-1.49
			df		44	44	44	46
			P-value		0.656	0.984	0.14	0.143
