# Supplementary material for: TRPC3 is a major contributor to functional heterogeneity of cerebellar Purkinje cells
Source: eLife journal article supplement (doi:10.7554/elife.45590), 2019-09-05
Supplement: supp [file elife-45590-supp-v1.zip › elife_poa_e45590_Figure_6_source_data_1.xlsx]

## Sheet: Erasmus Ladder
	Back steps percentage								Short steps percentage								Long steps percentage								Jump percentage								Lower steps percentage
	Genotype	Mouse #	Session_nr (day)						Genotype	Mouse #	Session_nr (day)						Genotype	Mouse #	Session_nr (day)						Genotype	Mouse #	Session_nr (day)						Genotype	Mouse #	Session_nr (day)
			1	2	3	4	5				1	2	3	4	5				1	2	3	4	5				1	2	3	4	5				1	2	3	4	5
	WT	1	1.22736	0.78348	0	0.14881	0		WT	1	29.3164	22.7966	8.397	14.4794	17.4582		WT	1	51.1877	66.4842	85.4566	82.9698	79.3301		WT	1	1.29367	1.8044	0.15873	0.670428	0.753968		WT	1	7.51737	4.06687	4.01426	0.716377	1.22887
	WT	2	0.94646	0	1.50626	0.310124	0.140056		WT	2	8.87461	2.03787	2.6201	1.65323	1.18663		WT	2	72.9786	91.2805	89.1963	95.4672	94.2717		WT	2	2.06056	2.33832	1.21426	0.976801	1.06294		WT	2	6.00467	0.945295	1.29272	0.704769	1.45926
	WT	3	2.38703	1.51397	1.19403	0.30754	0.712965		WT	3	12.6298	14.0631	14.7214	14.8123	16.2394		WT	3	47.748	59.1875	61.7916	70.1743	66.0216		WT	3	2.74561	1.01932	1.94165	2.61893	3.58921		WT	3	15.6759	10.2848	7.41418	4.25197	4.34304
	WT	4	2.18138	1.27303	0.434618	0.18315	0.18315		WT	4	13.6959	5.08221	5.7373	1.29535	1.77961		WT	4	46.3476	76.4735	78.6639	94.7865	92.263		WT	4	3.43428	2.35899	1.96036	0.953412	1.96526		WT	4	14.2291	6.85841	4.03166	1.02602	1.67582
	WT	5	3.06107	1.36401	0.614731	0.170068	0		WT	5	30.4911	33.2212	39.7135	24.5327	17.4957		WT	5	27.5579	41.3657	46.2544	67.4377	74.9103		WT	5	2.01286	2.00294	0.295381	0.708181	1.24597		WT	5	15.6204	9.52505	5.47465	3.11103	2.11561
	WT	6	1.84515	2.47749	0.813741	0.715453	0.252329		WT	6	8.59519	8.20266	8.73475	10.2396	17.5719		WT	6	48.9062	61.9091	73.4573	81.9997	78.8894		WT	6	1.13208	2.9523	2.6104	0.846088	0.396825		WT	6	19.2654	7.7405	5.85083	2.1712	1.09587
	WT	7	1.4144	0.530372	0	0.461073	0.446429		WT	7	6.98782	4.18699	2.27133	4.02244	3.21559		WT	7	65.9483	81.0795	86.7867	85.9835	89.3677		WT	7	5.38583	7.13768	2.3628	2.17761	1.74766		WT	7	6.42532	1.78746	2.94451	2.35326	2.0715
	WT	8	4.05302	2.01483	0.866875	0.777089	0.678729		WT	8	20.4038	22.7243	15.4463	12.7588	11.5025		WT	8	41.3233	58.8799	74.7683	78.1727	83.326		WT	8	5.27152	2.09415	1.69004	0.653894	1.22127		WT	8	9.68592	5.87962	2.90683	2.70893	0.890773
	WT	9	5.46946	3.7254	1.1865	0.816993	0.422932		WT	9	24.7366	31.8215	19.378	6.66913	10.974		WT	9	32.8088	45.2702	60.8198	75.579	81.7756		WT	9	4.0939	3.99361	2.92455	2.46131	0.78266		WT	9	11.5176	4.91818	4.38874	3.72292	1.89917
	WT	10	1.58278	1.91975	0.804739	0.727812	0.926371		WT	10	6.53775	5.6599	5.56697	3.69463	2.16918		WT	10	62.3825	61.1648	81.5948	81.8303	85.9297		WT	10	2.48139	3.79338	2.34258	2.89926	3.50768		WT	10	11.9499	8.53095	2.86205	3.69413	2.63432
	WT	11	6.66568	3.21376	0.536368	0.170068	0.467687		WT	11	20.7054	27.7872	10.8964	2.52006	0.869091		WT	11	32.0311	43.5198	70.2773	84.7638	88.5054		WT	11	5.07754	3.5881	4.70673	2.52605	1.55678		WT	11	10.9694	8.94066	4.11987	3.03593	2.26681
	WT	12	3.17923	0.961357	0.233538	0.106045	0.342212		WT	12	35.0751	22.3302	36.9582	26.3009	33.7408		WT	12	42.8693	66.8542	59.3145	69.4251	63.3179		WT	12	2.92598	1.95992	0.433777	0.929179	0.818917		WT	12	6.11374	3.17407	1.18767	0.945801	0.964642
	WT	13	1.78222	0.896859	1.73237	0.689103	0.15873		WT	13	12.1148	6.15567	3.0041	1.54686	3.81941		WT	13	57.0263	79.7835	84.5293	92.0777	89.4318		WT	13	3.3766	5.18936	7.25324	3.43379	3.09977		WT	13	10.1815	3.00777	1.38977	0.891331	1.22013
	WT	14	4.68191	6.81876	6.33156	6.52033	0.80815		WT	14	8.79027	4.87134	6.06665	4.24233	2.87546		WT	14	45.6105	67.6153	58.0017	69.9484	87.9098		WT	14	8.40563	10.5085	11.2921	7.90153	0.683761		WT	14	12.4431	2.72065	6.83994	3.96208	2.99374
	WT	15	4.87617	6.09387	6.37202	6.28014	0.850687		WT	15	13.34	9.85738	17.67	19.7007	10.1239		WT	15	57.1795	66.7632	55.9476	57.7996	77.1604		WT	15	7.22343	8.61142	8.62886	11.5671	2.52651		WT	15	6.7473	2.72369	4.27186	1.22916	3.02741
	WT	16	4.4957	3.4289	3.718	3.51878	0.717522		WT	16	66.7241	77.4157	79.3039	81.455	91.0273		WT	16	14.1415	11.4967	11.0385	10.2455	4.85558		WT	16	3.03018	2.44517	1.7931	1.67713	0		WT	16	4.43411	1.79007	1.01883	1.04064	1.52415
	MUT	1	0.547067	0.140056	0.30754	0.456349	0.14881		MUT	1	10.3787	15.5813	5.11131	3.42812	2.38967		MUT	1	54.428	62.8715	87.9252	92.6969	92.4635		MUT	1	1.72577	1.44514	1.25589	1.24215	1.35301		MUT	1	18.7158	10.4009	2.19377	0.480769	1.28859
	MUT	2	0.505411	0.384858	0	0.52831	0		MUT	2	60.7122	80.7268	90.2962	82.0927	92.4663		MUT	2	29.7657	16.6465	9.05033	15.9447	6.4795		MUT	2	0.327664	0.779564	0.10352	0.297964	0.18315		MUT	2	4.35434	0.768264	0.0915751	0.344888	0.26186
	MUT	3	0.91302	0.622965	0.15873	0.894403	0.302343		MUT	3	9.51076	6.83324	5.00196	6.86335	7.74009		MUT	3	75.4554	84.4175	88.7792	83.8192	80.1505		MUT	3	1.7565	1.51317	1.67685	1.57552	2.10755		MUT	3	4.93471	2.73581	2.05913	3.08861	3.52987
	MUT	4	4.28211	0.640892	1.02363	0.705434	0.6127		MUT	4	52.1179	77.6177	63.4431	36.4808	32.4668		MUT	4	24.5003	17.7457	27.2644	54.9004	59.029		MUT	4	0.708252	0.380334	0.827864	0.8984	0.765571		MUT	4	7.33222	1.22725	3.54858	3.41771	3.28168
	MUT	5	1.24129	1.56576	0.132275	0.690716	0.226757		MUT	5	34.2152	13.8744	14.738	19.6295	19.7533		MUT	5	46.9003	78.3562	79.5154	75.0142	77.4122		MUT	5	1.20404	0.479497	1.13394	0.298786	0.697279		MUT	5	6.59662	1.97216	1.33414	1.79275	0.728458
	MUT	6	1.36702	0.222567	0.33196	0.132275	0.15873		MUT	6	44.2504	67.7392	49.0986	32.6913	26.6922		MUT	6	30.6183	24.1061	38.9383	47.9134	67.1534		MUT	6	1.30838	0.792657	1.89077	1.60911	1.17096		MUT	6	10.851	2.99528	4.55508	9.05326	1.92378
	MUT	7	1.35994	0.776499	1.21999	0.704365	0.31746		MUT	7	10.2345	3.25539	4.37224	1.32827	7.48672		MUT	7	54.3983	76.6316	78.8102	88.8716	79.4626		MUT	7	1.98607	2.24672	3.21291	1.90645	1.99768		MUT	7	12.3574	5.20496	4.47203	2.16684	4.44002
	MUT	8	2.22243	0.936505	0.820577	0.297619	0.507842		MUT	8	25.0834	13.4575	14.9905	14.2959	12.9496		MUT	8	43.9681	68.1093	69.3796	76.7449	82.2265		MUT	8	2.41865	1.21401	1.2428	1.18655	1.04935		MUT	8	10.0659	7.20798	4.23041	3.02494	1.49043
	MUT	9	4.22647	1.54254	0.7163	1.3529	0.513511		MUT	9	20.7934	24.0599	16.2902	20.2514	18.2864		MUT	9	36.6041	49.086	66.1694	63.5308	64.8108		MUT	9	4.49521	1.98035	2.08224	1.48387	1.48651		MUT	9	14.7674	9.02004	5.89562	4.50618	6.17635
	MUT	10	2.49279	1.70811	0.510204	0.585317	0.466597		MUT	10	8.21299	2.71114	3.66061	3.5433	7.04077		MUT	10	51.1712	85.6132	88.407	87.7476	84.8665		MUT	10	4.10425	1.7418	2.2154	2.27063	2.01699		MUT	10	13.4854	3.37093	3.0289	2.23803	2.21063
	MUT	11	0.607303	0.607743	0.784549	1.05093	0.589095		MUT	11	47.5762	20.1655	20.3265	25.5463	22.1228		MUT	11	43.2441	72.7252	73.7195	66.5881	69.4552		MUT	11	0.588417	0.796485	0.648593	0.561197	1.04174		MUT	11	3.18711	2.07892	1.57937	1.88428	1.89745
	MUT	12	2.4049	1.30887	0.384417	0.917017	0.30754		MUT	12	32.4163	33.516	27.5119	13.6672	21.0089		MUT	12	51.356	57.5692	63.5418	74.1055	70.8202		MUT	12	1.77562	1.18193	1.07911	1.36473	1.14309		MUT	12	4.82468	1.7021	3.14107	3.39307	3.11294
	MUT	13	1.25142	0.281085	1.36762	0.612467	0.389864		MUT	13	7.13649	3.79115	6.15746	7.42556	4.81734		MUT	13	68.5184	77.1587	72.5955	73.6621	86.3642		MUT	13	3.14296	0.695099	6.68989	1.99988	2.73471		MUT	13	8.81669	7.24873	3.3155	6.33633	1.84579
	MUT	14	6.16781	6.44185	6.39067	6.63382	1.80837		MUT	14	30.5565	53.7645	43.8601	49.9917	54.3132		MUT	14	41.0447	27.3863	36.85	34.6397	34.8898		MUT	14	4.97028	4.03643	5.70424	3.14645	1.20844		MUT	14	5.50369	2.31861	1.95536	1.70797	3.03205
	MUT	15	6.54065	6.0961	5.12072	6.26437	0.715703		MUT	15	10.2137	4.15787	3.22371	5.89949	6.03777		MUT	15	45.2924	57.5216	63.1193	57.7546	81.36		MUT	15	8.59719	12.3264	10.3491	10.7033	5.36965		MUT	15	10.709	5.15481	4.60594	5.27282	1.73806
	MUT	16	6.29642	7.53323	6.4021	7.35633	2.03449		MUT	16	13.4542	19.9719	13.4737	17.0947	16.7222		MUT	16	37.6954	31.8205	39.1547	36.6578	58.1303		MUT	16	9.36701	8.02036	5.30027	6.97122	2.71224		MUT	16	11.847	12.1841	12.562	10.1124	7.286
	WT	Average	3.24145	2.41549	1.75636	1.45025	0.473863		WT	Average	19.9387	18.6384	17.2804	14.3702	15.1281		WT	Average	46.6279	61.1955	67.3687	74.9163	77.3291		WT	Average	3.74694	3.86235	3.22553	2.68755	1.55995		WT	Average	10.5488	5.18088	3.75052	2.22285	1.9632
		sem	0.432034	0.484076	0.50912	0.530997	0.0768418			sem	3.85191	4.72646	4.99364	4.9222	5.53193			sem	3.77987	4.76566	4.95032	5.04709	5.30603			sem	0.514071	0.674695	0.796249	0.743126	0.275632			sem	1.0556	0.772545	0.496278	0.323125	0.232379
	MUT	Average	2.65163	1.9256	1.60446	1.82391	0.568738		MUT	Average	26.0539	27.5765	23.8473	21.2643	22.0184		MUT	Average	45.935	55.4853	61.4512	64.412	68.4421		MUT	Average	3.02977	2.47687	2.83834	2.34476	1.68987		MUT	Average	9.27181	4.72442	3.66053	3.6763	2.76525
		sem	0.538854	0.607209	0.554245	0.617443	0.140615			sem	4.41885	6.79263	6.32608	5.28274	5.71663			sem	3.37197	6.1279	6.01828	5.4703	5.41813			sem	0.675592	0.807213	0.695923	0.680898	0.302413			sem	1.08705	0.878994	0.700638	0.70076	0.473513
	WT : littermate controls
	MUT : pcp2Cre;TRPC3fl/fl

## Sheet: Compensatory eye movement
	OKR gain									VVOR gain									VOR gain
	Genotype	Mouse #	Frequency							Genotype	Mouse #	Frequency							Genotype	Mouse #	Frequency
			0.1	0.2	0.4	0.6	0.8	1				0.1	0.2	0.4	0.6	0.8	1				0.1	0.2	0.4	0.6	0.8	1
	WT	1	0.914224	1.01681	0.752529	0.432839	0.272663	0.203145		WT	1	0.939786	0.948248	0.98598	0.986962	1.02547	0.978057		WT	1	0.437017	0.49004	0.621427	0.760212	0.841404	0.881538
	WT	2	0.875572	0.806105	0.636718	0.411578	0.255704	0.241955		WT	2	0.851899	0.856396	0.931657	0.98116	0.899997	0.977803		WT	2	0.437609	0.413878	0.61593	0.718361	0.757027	0.812292
	WT	3	0.883131	0.836822	0.643901	0.384588	0.274076	0.228676		WT	3	0.910774	0.94499	0.97167	0.970328	1.02613	1.00676		WT	3	0.340385	0.267001	0.511327	0.850527	0.942296	0.993491
	WT	4	0.845617	0.767145	0.702759	0.412084	0.27641	0.265642		WT	4	0.895829	0.939897	0.951049	0.982463	0.970634	0.948618		WT	4	0.390347	0.448338	0.570502	0.71985	0.857743	0.890683
	WT	5	0.860214	0.844886	0.612021	0.368123	0.20355	0.190905		WT	5	0.925434	0.804767	0.983363	1.02409	0.994237	0.934258		WT	5	0.284791	0.446349	0.68539	0.810152	0.853678	0.94528
	WT	6	0.916278	0.885278	0.653354	0.418195	0.220144	0.251423		WT	6	0.963053	0.974414	0.986307	0.971561	0.994537	0.865581		WT	6	0.439067	0.499076	0.698204	0.810959	0.933238	0.86656
	WT	7	0.778411	0.737121	0.463812	0.317487	0.207659	0.187793		WT	7	0.899494	0.896903	0.963267	1.00551	1.03046	0.934389		WT	7	0.344535	0.459724	0.608066	0.793535	0.932261	0.895142
	WT	8	0.864822	0.856539	0.709138	0.434144	0.288242	0.243395		WT	8	0.898014	0.905128	0.959305	1.0163	1.01919	1.02118		WT	8	0.38627	0.573567	0.733643	0.795223	0.898129	0.897587
	WT	9	0.974607	0.943607	0.529953	0.46821	0.297517	0.257327		WT	9	0.948465	0.99214	1.09444	0.884306	1.01192	1.04586		WT	9	0.372323	0.572958	0.78998	0.961225	1.04584	1.19185
	WT	10	0.966772	0.892665	0.760719	0.430159	0.245728	0.195656		WT	10	1.00799	1.00709	1.01247	1.08807	1.00412	1.0219		WT	10	0.126884	0.141837	0.538944	0.516263	0.637762	0.78616
	WT	11	0.930502	1.03983	0.874705	0.69241	0.437503	0.357768		WT	11	1.05685	1.0089	1.02568	0.996529	1.03564	0.979909		WT	11	0.085878	0.138198	0.539633	0.683072	0.826901	0.88199
	WT	12	0.968639	0.777042	0.709805	0.511294	0.38062	0.308517		WT	12	0.990723	1.05326	1.05291	1.16331	1.16844	1.11016		WT	12	0.279391	0.386099	0.711848	0.822322	0.89618	1.1744
	MUT	1	0.890667	0.78554	0.816211	0.470749	0.270902	0.201168		MUT	1	0.836066	0.856593	0.889152	0.829062	0.962914	0.943958		MUT	1	0.386355	0.564691	0.638885	0.792326	0.882332	0.891813
	MUT	2	0.862464	0.871113	0.726769	0.573911	0.356827	0.252616		MUT	2	0.864004	0.903808	0.929322	0.971079	1.01512	0.971677		MUT	2	0.346878	0.478021	0.566199	0.544584	0.662533	0.57017
	MUT	3	0.866275	0.804275	0.540289	0.323064	0.239785	0.233278		MUT	3	0.919168	0.872053	0.905986	0.885763	0.894824	0.887934		MUT	3	0.420662	0.39182	0.509734	0.784484	0.865707	0.879087
	MUT	4	0.834126	0.789927	0.646411	0.460052	0.267494	0.278579		MUT	4	0.951208	0.916726	0.984649	1.02002	1.03779	0.992229		MUT	4	0.411243	0.438466	0.531164	0.644	0.819882	0.806436
	MUT	5	0.928043	0.953656	0.74323	0.487502	0.281129	0.228828		MUT	5	0.982733	0.985308	1.03554	1.04686	0.98659	1.0698		MUT	5	0.161814	0.31932	0.429621	0.672514	0.762414	0.99819
	MUT	6	1.10019	0.70504	0.867205	0.598526	0.458742	0.289214		MUT	6	1.00063	1.12211	0.999187	1.1691	0.645389	1.0319		MUT	6	0.213707	0.184775	0.723657	0.923678	0.916456	1.06884
	MUT	7	0.966431	0.911125	0.721105	0.527561	0.290233	0.277113		MUT	7	1.08015	0.961423	0.917076	1.00527	1.06718	1.04853		MUT	7	0.0906619	0.0747956	0.364034	0.525425	0.610339	0.848586
	MUT	8	0.995993	0.972339	0.760371	0.416619	0.27078	0.246352		MUT	8	1.01364	1.03592	1.14667	1.00145	1.02545	1.09332		MUT	8	0.448493	0.505386	0.942911	0.993804	0.94765	1.15253
	MUT	9	0.803045	0.892971	0.775989	0.460173	0.231684	0.207595		MUT	9	1.01562	1.03556	1.05001	0.94235	0.887208	0.877114		MUT	9	0.0759798	0.202807	0.407025	0.561444	0.685864	0.692964
	MUT	10	0.839882	0.777882	0.379088	0.465824	0.245293	0.253627		MUT	10	0.808786	0.867525	0.695218	0.975372	0.865343	0.904153		MUT	10	0.11576	0.203304	0.451391	0.716823	0.723715	0.873568
	WT	Average	0.898232	0.866987	0.670785	0.440092	0.279985	0.24435		WT	Average	0.940692	0.944345	0.993175	1.00588	1.01507	0.985373		WT	Average	0.327041	0.403089	0.635408	0.770142	0.868538	0.934748
		sem	0.0168639	0.0274308	0.0312228	0.0268386	0.0198161	0.014572			sem	0.0164291	0.0202629	0.0133457	0.0196191	0.0175444	0.0181236			sem	0.0336198	0.0425658	0.0254113	0.0310773	0.0295499	0.0368584
	MUT	Average	0.908712	0.846387	0.697667	0.478398	0.291287	0.246837		MUT	Average	0.947201	0.955703	0.955282	0.984633	0.93878	0.982061		MUT	Average	0.267155	0.336339	0.556462	0.715908	0.787689	0.878219
		sem	0.0286197	0.0274223	0.0453655	0.0246946	0.0216445	0.00938886			sem	0.0279128	0.0279326	0.0382108	0.0290395	0.0392372	0.0246271			sem	0.047416	0.0518008	0.0551259	0.0502755	0.0365857	0.0538958
	OKR Phase									VVOR phase									VOR phase
	Genotype	Mouse #	Frequency							Genotype	Mouse #	Frequency							Genotype	Mouse #	Frequency
			0.1	0.2	0.4	0.6	0.8	1				0.1	0.2	0.4	0.6	0.8	1				0.1	0.2	0.4	0.6	0.8	1
	WT	1	-1.95405	-9.5236	-11.1685	-20.7608	-32.0463	-37.5232		WT	1	1.65566	1.4164	2.71305	1.92823	2.50019	3.09944		WT	1	34.1405	23.9082	21.4581	16.463	12.9445	8.22312
	WT	2	0.39794	-3.75368	-7.67108	-21.4625	-30.1478	-32.7822		WT	2	3.48046	1.86968	1.85735	1.81123	2.12492	2.33224		WT	2	51.3545	29.5016	19.4356	11.152	9.17691	6.99513
	WT	3	-2.11367	-6.13125	-13.0309	-22.748	-24.6947	-29.5027		WT	3	3.2567	2.56119	2.88933	1.75594	0.7514	1.08506		WT	3	57.1978	47.475	37.9471	19.672	17.4458	13.6294
	WT	4	-4.34223	-3.0306	-7.96667	-23.0806	-30.7576	-25.8598		WT	4	1.9513	0.520706	2.5813	1.55255	-3.78041	-3.72485		WT	4	32.4849	24.1681	23.1943	13.261	8.97124	9.9995
	WT	5	0.983042	-3.0947	-10.2529	-26.5722	-32.9356	-36.0827		WT	5	0.0437477	2.13314	2.08494	2.18314	1.49407	0.334423		WT	5	57.0161	39.7544	21.6741	12.6351	10.3391	7.40491
	WT	6	-4.16885	-5.55885	-9.36285	-19.1185	-31.8456	-32.6659		WT	6	-0.326201	0.624938	1.1751	3.85944	0.979079	0.611794		WT	6	39.5029	18.6406	19.2111	10.7249	9.65672	5.5741
	WT	7	-2.06277	-3.30096	-7.69788	-16.7928	-27.9894	-28.7405		WT	7	5.24414	4.57376	2.22842	2.55499	3.96175	1.48774		WT	7	45.5128	31.9343	25.0503	18.3227	12.9046	10.4008
	WT	8	-1.92282	-4.95981	-9.57249	-18.9833	-30.5584	-30.8975		WT	8	3.53634	2.1363	2.77137	2.3739	2.72535	0.772106		WT	8	58.9273	31.7469	16.632	13.6077	8.37363	5.3565
	WT	9	-3.40207	-4.79207	-20.9171	-21.1941	-26.9262	-21.9828		WT	9	3.02463	0.986948	3.24673	0.974834	1.73301	3.64635		WT	9	40.1393	25.7049	24.4649	17.4774	12.9143	8.22363
	WT	10	-3.68291	-3.68415	-10.0156	-19.0506	-26.4613	-22.1793		WT	10	-0.0306022	0.555531	2.64704	4.37469	3.89738	2.68386		WT	10	44.937	52.2951	23.7221	18.4497	11.8316	10.286
	WT	11	-4.88785	-3.14594	-9.37503	-16.2521	-23.9088	-22.9775		WT	11	0.799069	0.887162	0.485214	0.653525	-2.63784	2.96424		WT	11	94.8896	41.4425	29.9106	25.4262	21.5915	16.3025
	WT	12	-11.389	-4.23371	-9.70505	-20.1193	-31.0175	-33.1853		WT	12	-0.847071	0.610037	2.77644	1.29862	1.98538	1.13682		WT	12	21.15	29.7193	22.8283	16.1137	11.0555	11.1773
	MUT	1	-6.56734	-5.33295	-14.7137	-31.5953	-36.9933	-42.1317		MUT	1	-0.811699	4.58847	-1.67495	5.20692	3.22129	0.162343		MUT	1	34.0501	0.462493	12.6062	6.02485	10.2865	5.8821
	MUT	2	-8.81093	-3.60752	-9.35527	-14.0578	-22.3876	-30.2675		MUT	2	1.99486	2.19317	2.24649	2.80738	2.20137	2.42349		MUT	2	40.7921	23.4718	21.694	12.1671	11.406	3.6472
	MUT	3	-9.26517	-9.39517	-14.0641	-18.7402	-28.5763	-31.7787		MUT	3	2.7691	-7.81928	0.160957	-1.42004	-2.29286	-0.621335		MUT	3	20.4073	29.5993	26.5533	12.8905	10.7349	10.8963
	MUT	4	-6.56251	-6.32059	-6.23555	-11.2662	-19.4266	-25.2665		MUT	4	2.57426	3.94341	3.3781	3.71027	2.92015	5.31309		MUT	4	34.866	21.639	18.3677	15.8061	11.8484	9.71835
	MUT	5	-2.04459	-6.00932	-10.0594	-20.0334	-36.7147	-33.7791		MUT	5	0.323916	0.298366	1.21622	2.34365	1.2004	1.40616		MUT	5	53.4422	37.7319	25.9444	18.9238	13.9528	11.5552
	MUT	6	-2.64057	-11.9256	-8.83388	-20.2073	-29.0176	-21.2328		MUT	6	-4.46596	-0.461891	3.89119	1.79988	9.41345	0.782626		MUT	6	40.1549	37.5188	24.8641	20.2585	9.24401	10.9503
	MUT	7	-5.86533	-4.97719	-10.329	-10.47	-25.0154	-24.896		MUT	7	-2.15057	-2.61425	0.406757	2.31312	3.26287	2.96979		MUT	7	54.7285	15.3994	35.8951	27.3781	19.1605	15.2984
	MUT	8	-3.81126	-4.02174	-10.1904	-20.0873	-30.3393	-26.7398		MUT	8	-0.631646	0.804193	1.5896	2.94609	4.15283	2.72292		MUT	8	55.4326	29.0817	24.1234	15.1043	11.3706	12.5469
	MUT	9	-9.82458	-4.98387	-8.9552	-18.5213	-34.0218	-39.8047		MUT	9	-1.12645	-2.85258	0.544625	6.48469	2.48689	7.36163		MUT	9	52.2577	43.7347	41.2447	28.3298	22.5601	15.59
	MUT	10	-3.10711	-3.23711	-20.0125	-14.4677	-30.7941	-34.2299		MUT	10	-3.46569	-0.978217	-1.22699	0.254083	-1.24809	-1.11302		MUT	10	56.9538	19.8086	38.2164	20.9554	19.5178	11.1104
	WT	Average	-4.41112	-5.2282	-10.5613	-20.5112	-29.1074	-29.5316		WT	Average	1.81568	1.57298	2.28802	2.11009	1.31119	1.3691		WT	Average	48.1044	33.0243	23.794	16.1088	12.2671	9.46442
		sem	0.690364	0.498523	1.03697	0.817893	0.869763	1.5337			sem	0.552737	0.342752	0.228091	0.314896	0.676435	0.560561			sem	5.36426	2.94456	1.61032	1.20566	1.11058	0.930576
	MUT	Average	-5.84994	-5.9811	-11.2749	-17.9447	-29.3287	-31.0127		MUT	Average	-0.498987	-0.289861	1.0532	2.64461	2.53183	2.14077		MUT	Average	44.3085	25.8448	26.9509	17.7838	14.0082	10.7195
		sem	0.904997	0.859804	1.24686	1.91209	1.83785	2.11978			sem	0.78029	1.14791	0.570694	0.7127	1.0033	0.836274			sem	3.85014	3.99351	2.85156	2.17462	1.47459	1.17086
	VOR gain decrease										VOR gain increase (normalized)									OKR gain increase
	Genotype	Mouse #	Time (mins)								Genotype	Mouse #	Time (mins)							Genotype	Mouse #	Frequency
			0	5	10	15	20	25	30				0	5	10	15	20	25				0.1	0.2	0.4	0.6	0.8	1
	WT	1	0.782706	0.605107	0.526513	0.475508	0.44182	0.466224	0.365421		WT	1	1	1.42805	1.72386	1.57876	1.87827	1.91659		WT	1	0.815688	0.738836	0.836533	0.769959	0.704803	0.606842
	WT	2	0.673412	0.507015	0.630376	0.422868	0.388704	0.482329	0.207143		WT	2	1	1.13442	1.05445	1.12327	1.17027	1.21727		WT	2	0.889087	0.885821	0.958142	0.9424	0.947168	0.908401
	WT	3	0.801024	0.540049	0.452152	0.41486	0.628865	0.403011	0.420723		WT	3	1	0.912053	1.01916	1.16077	1.18828	1.1023		WT	3	0.683648	0.73526	0.690761	0.687926	0.701605	0.603314
	WT	4	0.708748	0.570782	0.501736	0.189472	0.422396	0.386571	0.348793		WT	4	1	0.968917	1.24098	1.47367	1.43378	1.57093		WT	4	0.819403	0.819527	0.856768	0.836135	0.83872	0.730165
	WT	5	0.784021	0.622132	0.474399	0.533039	0.459298	0.397351	0.350338		WT	5	1	0.901231	0.98682	1.02523	1.13765	1.20833		WT	5	0.973446	0.878258	0.824634	0.779532	0.728552	0.605527
	WT	6	0.646303	0.681113	0.5451	0.526413	0.487639	0.496285	0.552076		WT	6	1	0.955138	0.97446	1.00724	0.796209	1.1339		WT	6	0.84862	0.761113	0.674586	0.70428	0.645547	0.673378
	WT	7	0.762568	0.591778	0.621685	0.581251	0.498373	0.51402	0.445626		WT	7	1	0.965826	0.894732	1.35339	1.5394	1.02263		WT	7	0.880775	0.91624	0.748984	0.863523	0.858246	0.702272
	WT	8	0.969524	0.830647	0.792703	0.843078	0.720769	0.657231	0.573256		WT	8	1	0.940541	1.03733	1.11564	1.07777	1.22001		WT	8	0.972681	0.863691	0.950722	0.84942	0.945964	0.835691
	WT	9	0.826148	0.732547	0.898598	0.625102	0.601083	0.669407	0.681557		WT	9	1	1.30709	1.4108	1.06398	1.32815	1.40819		WT	9	0.86467	0.850254	0.855497	0.838534	0.792537	0.68462
	WT	10	0.911819	0.77065	0.374332	0.17798	0.607981	0.586597	0.508543		WT	10	1	1.23623	0.914725	1.25976	1.29035	0.963559		WT	10	0.719189	0.903851	0.809185	0.862169	0.705493	0.747731
	WT	11	0.737041	0.64385	0.565305	0.628205	0.452456	0.380396	0.455484		WT	11	1	0.802683	1.14026	0.961409	1.45281	1.33683		WT	11	0.998652	1.04712	0.980011	0.946265	0.908468	0.762944
	WT	12	0.647314	0.52683	0.426674	0.386906	0.378301	0.345284	0.274219		WT	12	1	0.813073	0.973533	0.954412	1.28426	0.923245		WT	12	1.00682	0.978815	1.07224	0.936265	0.865504	0.789439
	WT	13	0.987298	0.737386	0.743546	0.723915	0.623224	0.559744	0.67496		MUT	1	1	1.19709	1.65205	1.44689	1.86752	2.02428		MUT	1	0.889646	0.727172	0.564698	0.64594	0.742169	0.593916
	MUT	1	0.703705	0.593492	0.562485	0.496007	0.547583	0.443293	0.403699		MUT	2	1	1.03313	1.06625	1.33121	0.865206	1.23969		MUT	2	0.804005	0.841457	0.876551	0.881133	0.83959	0.709312
	MUT	2	0.637143	0.551874	0.389468	0.465455	0.471788	0.404912	0.466911		MUT	3	1	0.839095	0.978746	0.930354	0.932143	1.02468		MUT	3	0.909703	0.802601	0.786541	0.773496	0.737936	0.71877
	MUT	3	0.502757	0.535323	0.482405	0.476584	0.320674	0.395182	0.409962		MUT	4	1	0.900381	1.05794	1.26446	1.26471	1.33222		MUT	4	0.872236	0.882751	0.680385	0.764442	0.758312	0.799457
	MUT	4	0.873433	0.771044	0.785723	0.587222	0.68148	0.623224	0.689821		MUT	5	1	0.858607	0.979596	0.994756	1.17691	1.16359		MUT	5	1.03956	1.06157	0.947811	1.01503	1.03014	0.916482
	MUT	5	0.901117	0.523978	0.666492	0.570566	0.561525	0.550586	0.503117		MUT	6	1	1.12909	1.15379	1.43936	1.30579	1.10928		MUT	6	0.615808	0.617175	0.602714	0.618113	0.534337	0.5367
	MUT	6	0.950927	0.689843	0.706622	0.609689	0.67001	0.693087	0.619326		MUT	7	1	1.24823	1.27453	1.62543	1.5268	1.42529		MUT	7	0.955191	0.865405	0.848767	0.868428	0.776771	0.802696
	MUT	7	0.469958	0.38434	0.304419	0.346077	0.37765	0.263027	0.235441		MUT	8	1	1.00329	1.1242	1.03525	1.01563	1.11778		MUT	8	0.7782	0.768053	0.762475	0.592146	0.77954	0.640084
	MUT	8	0.768888	0.682542	0.519757	0.511929	0.445091	0.45156	0.174115		MUT	9	1	1.2022	1.40441	0.995281	1.08361	1.25652		MUT	9	1.0088	1.02781	1.01288	1.01385	1.03916	0.956302
	MUT	9	0.777608	0.638707	0.629128	0.534039	0.510672	0.534799	0.529989		MUT	10	1	1.34632	1.59867	0.952753	1.2953	1.61037		MUT	10	1.01791	0.762266	0.880285	0.943541	0.931349	0.808469
	MUT	10	0.768114	0.451781	0.354202	0.310161	0.391695	0.236036	0.293413		MUT	11	1	1.46513	1.22057	1.27445	1.29822	1.25494
	MUT	11	0.594503	0.535655	0.479076	0.407371	0.477151	0.334698	0.366598											WT	Average	0.872723	0.864899	0.854839	0.834701	0.803551	0.72086
											WT	Average	1	1.03044	1.11426	1.17313	1.2981	1.25198			sem	0.030198	0.0270657	0.0344604	0.0249191	0.0302079	0.027479
	WT	Average	0.787533	0.643068	0.581009	0.5022	0.516224	0.488035	0.450626			sem	0	0.0576915	0.0695448	0.0586966	0.0775039	0.0806866		MUT	Average	0.889106	0.835626	0.796311	0.811612	0.816931	0.748219
		sem	0.0312346	0.0279862	0.0424779	0.0528039	0.0299211	0.0294548	0.0401418		MUT	Average	1	1.11114	1.22825	1.2082	1.23926	1.32351			sem	0.0412127	0.0423804	0.046176	0.049942	0.0479104	0.0426169
	MUT	Average	0.722559	0.578053	0.534525	0.483191	0.495938	0.448218	0.426581			sem	0	0.061447	0.0704369	0.0720122	0.085357	0.0854461
		sem	0.0476941	0.0337477	0.0459625	0.0290581	0.034511	0.0432215	0.047389
	VOR phase revesal
	Genotype	Mouse #	Day 1 - time (mins)							Day 2 - time (mins)							Day 3 - time (mins)							Day 4 - time (mins)							Day 5 - time (mins)
			0	5	10	15	20	25	30	0	5	10	15	20	25	30	0	5	10	15	20	25	30	0	5	10	15	20	25	30	0	5	10	15	20	25	30
	WT	1	14.5524	9.63494	8.6512	9.71618	15.478	16.4037	19.5972	16.5502	10.0047	15.0683	27.3807	26.6754	39.4587	35.4855	24.7458	54.6736	144.199	121.698	128.317	133.641	139.32	39.3775	169.593	167.633	165.564	147.775	163.994	156.733	103.695	165.889	163.821	163.807	149.856	153.767	155.837
	WT	2	4.65551	5.52416	6.23426	4.53064	3.76999	2.27896	-13.8025	5.54743	7.69338	10.5419	12.0191	8.13213	14.3019	14.5663	12.3004	7.04441	15.251	17.8971	40.2006	27.1745	37.9181	18.3389	15.3347	44.872	54.1973	67.0937	63.8504	50.4451	43.9325	101.447	65.8183	147.461	141.6	132.389	103.418
	WT	3	17.9983	21.345	26.573	22.757	25.4393	27.5739	25.3466	19.6344	22.4171	35.4609	25.9621	23.4774	42.0972	50.1097	37.3424	30.9314	43.1791	36.8421	45.5684	62.4606	57.9894	19.9426	44.5648	55.2218	33.8235	49.2089	34.5767	55.053	52.3785	141.968	83.464	100.696	118.332	123.957	152.913
	WT	4	12.5102	13.7785	12.5377	27.9512	20.4546	13.8101	15.5608	15.1241	10.4984	27.4138	44.5796	40.4548	58.2187	92.6593	36.7416	103.796	156.817	160.578	162.009	162.395	146.715	72.4168	169.873	175.912	170.098	170.25	167.266	156.402	141.387	166.789	175.822	179.725	149.614	152.986	166.16
	WT	5	10.5286	8.59601	6.61106	7.33821	7.9263	10.3421	14.7597	9.72921	9.07241	13.5004	8.06883	16.8309	14.4364	26.9582	17.6205	17.1354	35.979	119.992	97.7515	45.911	80.5009	23.3416	54.5056	139.03	179.069	198.535	167.542	169.228
	WT	6	6.72119	4.29771	11.8517	7.51538	15.826	14.381	17.7041	13.3706	8.60047	10.7586	12.9167	7.12847	-0.833454	21.0906	13.1405	22.7473	26.5672	15.6297	20.0887	21.1735	38.8718	22.1108	31.0436	39.3715	42.4945	48.7947	50.3539	53.5725
	WT	7	14.1874	13.138	16.2941	16.2992	21.5405	16.8792	16.4379	15.5838	16.663	16.2716	21.2457	24.1636	23.4322	23.8064	19.3252	15.4274	25.2562	33.102	52.7441	45.3515	38.7872	27.8302	40.815	61.581	76.3305	93.1225	109.469	111.415
	WT	8	8.10907	6.34952	7.60009	7.38146	7.45878	11.1671	9.60336	11.4936	12.5771	14.5102	11.1348	17.5141	16.2509	20.6205	17.9278	16.9114	21.3317	22.7732	23.7798	29.361	28.5616	19.8468	16.2513	28.7629	29.442	42.93	72.3059	72.7418	27.3268	81.0578	65.141	90.1528	110.7	101.457	121.49
	WT	9	18.7614	18.0182	16.3238	21.9753	20.1107	15.2044	19.6546	16.6825	17.6618	23.2786	24.3088	22.0098	23.0302	18.4559	21.7176	25.1062	30.9282	35.0691	32.4634	156.654	27.3564	26.1864	32.6405	47.4026	46.8903	69.7562	115.298	89.0167	16.5008	48.1631	133.905	137.895	144.483	152.645	152.303
	WT	10	17.592	14.5398	20.1417	27.1954	15.812	18.3408	16.4028	29.6135	20.107	21.0641	19.8504	23.6837	17.4147	25.1966	14.6642	28.5725	56.9605	37.6245	37.4049	45.155	28.8063	57.7571	85.9988	56.1964	26.394	179.547	186.022	179.411	90.0307	179.131	168.306	160.065	169.058	176.683	177.798
	WT	11	11.9718	16.1558	16.3193	17.6146	19.3378	13.7428	19.2432	14.4418	15.2897	15.8923	20.5926	24.3115	18.0702	17.8727	12.1787	17.9831	27.7433	25.06	11.667	23.083	26.1027	17.0285	24.5863	21.7669	30.7565	20.1154	41.6111	26.2002	27.9346	34.0288	100.305	84.9993	89.0658	39.7066	122.532
	WT	12	19.4086	18.1043	25.9144	24.8622	26.742	18.0817	19.0432	22.1712	25.8633	38.1727	28.6602	33.3602	20.5809	43.148	29.8205	50.3197	107.682	71.5141	121.897	103.51	157.235	42.0935	90.8174	82.316	138.413	97.8358	128.595	109.654	87.1996	173.147	163.359	179.23	173.559	168.393	132.745
	WT	13	13.4274	13.4574	12.1775	15.902	18.0906	11.996	10.8403	11.8089	12.8595	14.1141	28.8636	14.8881	13.3	26.134	16.3589	15.2491	39.9074	68.1592	54.8506	47.0558	84.6271	16.3952	94.5222	103.426	55.9804	18.7177	102.098	103.432	46.6554	182.135	163.425	177.339	176.807	115.322	180.627
	MUT	1	12.8225	13.0128	13.8749	17.1607	19.7119	13.4664	13.4988	20.2427	24.9065	25.0631	30.0724	22.8214	36.1617	37.1319	19.1738	38.2251	34.3545	57.2059	43.8532	98.0774	42.2156	-2.14188	2.06506	26.5357	37.5065	101.003	112.177	97.2667	60.9779	61.8539	107.248	168.27	153.176	159.933	153.782
	MUT	2	12.8193	13.8495	10.3187	13.092	19.779	18.9727	15.4673	20.7472	23.0943	24.1563	26.7227	24.804	32.6868	34.5454	6.80005	25.6323	33.1198	43.4683	38.2525	39.4941	38.3157	36.6382	80.1068	118.564	86.7047	129.817	134.368	126.965	97.9387	149.01	167.985	155.24	160.406	173.262	177.696
	MUT	3	19.906	15.9105	13.7687	13.2096	19.825	13.6393	16.9809	20.6758	18.955	23.8858	51.5683	32.7712	16.9562	25.8683	21.3362	23.926	24.3924	38.7094	65.9915	30.9726	45.7753	30.8961	29.6972	43.5423	80.1709	88.0331	81.5902	53.9652	73.5381	59.878	65.427	75.651	101.342	93.4405	100.923
	MUT	4	15.3334	8.03258	9.39624	14.097	6.6987	3.32754	3.31327	7.44324	8.87403	10.0322	3.57336	1.13974	4.43879	3.9491	16.1046	12.185	6.68642	8.83761	5.6942	5.68909	-5.36769	14.3556	9.90534	6.50145	-1.65437	-8.8965	0.26905	-1.73336
	MUT	5	9.84927	9.70992	9.70598	3.78194	7.91126	7.60678	7.61296	9.02294	13.7779	14.0779	14.6031	9.28283	17.9528	14.5006	12.9189	13.9598	16.414	24.4853	25.9033	38.8865	48.2295	23.584	35.0813	52.9337	90.1472	146.021	164.769	74.1219
	MUT	6	15.6406	14.9755	17.1582	17.7809	24.6338	17.0153	18.9554	15.7419	14.6521	20.4273	21.6576	19.5409	20.0524	26.168	17.9008	19.8655	17.0991	23.2069	27.3695	29.2509	35.7624	24.2886	24.1373	28.3044	38.2188	51.3874	58.9056	54.8167	34.7544	53.045	48.4286	66.6908	72.9479	81.3044	97.5508
	MUT	7	21.3783	19.0305	23.0543	19.8468	21.5883	22.5926	19.1985	11.4087	29.1325	34.0848	52.5616	45.7775	71.8465	58.0185	21.6732	34.4968	69.5907	109.617	122.123	120.108	105.187	34.8826	93.2601	158.264	160.079	169.53	156.247	157.728	74.6393	170.766	173.4	170.213	170.808	183.165	169.588
	MUT	8	19.9788	16.4204	20.2551	20.1892	14.3273	16.4926	58.624	18.8932	21.7844	40.0428	26.2476	34.0715	35.7285	34.9221	33.7647	87.8317	116.778	96.855	74.9879	127.799	91.2162	68.3957	135.246	160.946	157.612	162.748	167.843	159.896	87.0554	104.912	179.029	171.608	175.972	174.059	172.539
	MUT	9	17.2473	22.045	23.1762	23.6447	17.7041	19.3237	19.221	16.3657	18.3068	27.793	31.1367	30.907	29.9345	26.5469	25.8968	41.884	55.2678	61.185	50.0513	65.23	50.2055	23.3994	70.0377	59.6192	54.2973	82.2207	93.9444	81.9999	45.7083	125.25	112.038	116.392	111.599	121.97	140.818
	MUT	10	16.1354	20.3586	25.4954	30.5475	18.0639	27.5151	17.7612	14.3528	17.8395	19.3275	13.3898	44.7803	14.6158	30.871	20.7733	10.7027	81.5286	103.823	40.9723	90.9822	100.182	63.4902	40.4369	173.631	101.165	87.937	81.664	174.324	142.584	107.682	184.543	165.386	179.898	185.791	183.765
	MUT	11	24.3701	15.3103	21.9369	25.9228	22.7072	28.5769	26.9905	19.9822	23.0856	30.4665	31.1846	44.1028	45.331	36.0768	27.9821	54.7895	75.4095	68.9363	94.9368	141.423	117.192	76.1936	106.151	158.878	134.364	158.549	165.918	166.757	76.548	158.941	161.541	122.687	174.176	182.455	177.743
	WT	Average	13.1095	12.5338	14.4023	16.2338	16.7682	14.6309	14.6455	15.5193	14.5621	19.696	21.9679	21.7408	23.0583	32.008	21.068	31.2229	56.2924	58.9184	63.7494	69.4559	68.6763	30.9743	66.9652	78.7301	80.7272	92.5909	107.922	102.562	63.7041	127.376	128.336	142.137	142.308	131.731	146.582
		sem	1.30227	1.47148	1.87124	2.29602	1.90784	1.58751	2.61933	1.6624	1.58457	2.49604	2.71829	2.55273	4.23213	5.80266	2.41228	7.14577	13.2865	13.0176	13.2375	14.2492	13.6057	4.8111	14.6883	14.407	16.4871	17.1788	14.5751	14.0032	12.7016	17.8972	14.2602	11.8085	9.07169	12.6731	8.12259
	MUT	Average	16.8619	15.3323	17.1037	18.1157	17.5409	17.139	19.784	15.8979	19.4917	24.487	27.5198	28.1818	29.6095	29.8726	20.3931	33.0453	48.2401	57.8481	53.6487	71.6285	60.8103	35.8166	56.9204	89.7926	85.3283	106.214	110.7	104.192	77.0827	110.149	133.293	134.682	144.481	150.598	152.712
		sem	1.28662	1.27251	1.80332	2.18529	1.73003	2.30445	4.31839	1.45354	1.72322	2.59717	4.48736	4.37454	5.53237	4.13506	2.20759	6.87012	10.3346	10.3299	10.121	13.9457	11.2728	7.27475	12.9238	19.4255	15.5373	16.4066	16.1593	17.3064	10.461	14.8826	17.1862	13.7968	13.0221	13.6185	11.0305
	WT : littermate controls
	MUT : pcp2Cre;TRPC3fl/fl

## Sheet: Statistics
	Step types	F-value	P-value
	Back steps	0.011	0.917
	Short steps	0.98	0.33
	Long steps	0.923	0.344
	Jump	0.464	0.501
	Lower steps	0.012	0.913
	Paradigms	F-value	P-value
	OKR (gain / phase)	0.211 / 0.396	0.651 / 0.537
	VVOR (gain / phase)	0.240 /0.757	0.629 / 0.394
	VOR (gain / phase)	2.082 /0.038	0.165 / 0.848
	OKR gain increase	0.037	0.85
	VOR gain increase	0.346	0.563
	VOR gain decrease	0.764	0.392
	Phase reversal (Day 5)	0.035	0.854
