# Supplementary material for: TRPC3 is a major contributor to functional heterogeneity of cerebellar Purkinje cells
Source: eLife journal article supplement (doi:10.7554/elife.45590), 2019-09-05
Supplement: supp [file elife-45590-supp-v1.zip › elife_poa_e45590_Figure_7_source_data_1.xlsx]

## Sheet: Fraction eyelid closure
	Fraction eyelid closure
	Genotype	Mouse #	Session_nr
			1	2	3	4	5	6	7	8	9	10	11	12	13	14	15
	WT	1	0	0	0	0	18.75	0	40	50	77.7778		50	36.3636	100	75	93.3333
	WT	2		0	0	0	0	0	33.3333	100	100	94.1176	72.2222	93.75	100	100	95
	WT	3	0	0	0	35.7143	84.6154	92.8571	100	100	94.1176	100	81.25	92.3077	100	90	94.1176
	WT	4	0	0	0	0	7.14286	0	47.0588	85.7143	93.3333	100	92.8571	90.9091	92.8571	73.3333	85.7143
	WT	5	0	0	5.88235	94.4444	100	46.1538	92.3077	100	100	100	80	93.3333	100	92.8571	85.7143
	WT	6	20	41.1765	68.4211	85.7143	100	87.5	100	100	100	84.6154	84.6154	100	88.8889	93.3333	100
	WT	7	7.14286	20	33.3333	70.5882	68.75	46.6667	83.3333	100	100	87.5	100	88.8889	100	100	100
	WT	8	0	18.75	94.1176	100	88.2353	89.4737	92.8571	100	100	94.1176	84.6154	100	90.9091	100	100
	WT	9	14.2857	50	100	100	100	100	86.6667	100	100	100	93.75	100	100	94.7368	91.6667
	WT	10	6.66667	50	70.5882	66.6667	92.8571	83.3333	70	100	100	88.8889	100	100	100	100	100
	WT	11			0	94.1176	100	100	100	100	100	100	100
	WT	12	0		0	6.66667	12.5	9.09091	25	22.2222	50	100	81.25	66.6667	78.5714	82.3529	100
	WT	13	0	0	57.1429	68.75	85.7143	53.3333	100	100	86.6667	94.1176	66.6667	86.6667	100	93.75	0
	WT	14	8.33333	7.14286	64.2857	61.5385	94.1176	85.7143	61.1111	80	100	100	87.5	84.6154	100	100
	WT	15	6.25	83.3333	69.2308	100	81.8182	100	100	100	100	100	92.3077	100	100	100	100
	MUT	1	0	0	0	0	0	0	0	0	7.69231	7.14286	7.14286	64.2857	100	100	85.7143
	MUT	2	0	6.25	0	14.2857	0	16.6667	44.4444	20	75	100	78.5714	50	93.75	70	87.5
	MUT	3	0	6.25	0	0	7.69231	6.25	26.6667	41.6667	93.3333	100	93.75	100	100	100	100
	MUT	4	0	0	0	0	35.7143	35.7143	40	80	63.6364	100	75	100	93.3333	94.1176
	MUT	5	0		0	0	5.88235	37.5	6.25	47.0588	65	87.5	92.8571	100	100	100
	MUT	6	0	12.5	13.3333	0	20	42.8571	37.5	100	100	85.7143	100	100	100	100	100
	MUT	7	0	23.5294	66.6667	100	100	53.3333	69.2308	75		92.8571	100	100	100	100	100
	MUT	8	0	0	22.2222	66.6667	62.5	26.6667	82.3529	81.25		84.6154	53.3333		92.3077	100	100
	MUT	9	6.25	0	6.66667	47.0588	100	81.25	87.5	100	100	100	80	83.3333	86.6667	100	100
	MUT	10	0	8.33333	38.4615	7.69231	93.3333	68.75	90	92.8571	70.5882	76.4706	58.8235	88.8889	80	60	57.1429
	MUT	11	0	14.2857	94.4444	92.8571	100	100	100	87.5	100	100	100	100	84.6154	100	100
	MUT	12	0	0	0	6.66667	0	7.14286	87.5	68.75	88.2353	100	81.8182	86.6667	66.6667	80	87.5
	MUT	13	5.26316	0	0	18.1818	100	76.9231	78.5714	100	92.8571	100	93.75	100	90	94.4444	92.3077
	MUT	14	0	5.88235	0	14.2857	25	31.25	100	100	86.6667	100	66.6667	100	82.3529	100	0
	MUT	15	7.14286	0	0	43.75	56.25	0	70.5882	78.9474	94.7368	88.8889	71.4286	75	88.8889	73.3333	58.8235
	WT	Average	4.82143	20.8002	37.5335	58.9467	68.9667	59.6082	75.4445	89.1958	93.4597	95.9541	84.469	88.1072	96.5162	92.526	88.1189
		sem	1.66716	6.96068	9.29324	9.63171	9.22095	9.68538	6.58462	5.55371	3.29711	1.36456	3.32072	4.3336	1.61302	2.31733	6.9324
	MUT	Average	1.24373	5.5022	16.1197	27.4297	47.0915	38.9536	61.3736	71.5353	79.8266	88.2126	76.8761	89.1553	90.5721	91.4597	82.2299
		sem	0.671106	1.92196	7.45203	8.9315	10.8916	8.13663	8.55639	8.00464	7.02873	6.11923	6.30433	4.27941	2.45905	3.50681	8.00756
	WT : littermate controls
	MUT : pcp2Cre;TRPC3fl/fl

## Sheet: CR percentage
	CR percentage
	Genotype	Mouse #	Session_nr
			1	2	3	4	5	6	7	8	9	10	11	12	13	14	15
	WT	1	0.00272222	0.00205882	0.000571429	0.00338889	0.0475	0.0316923	0.0813333	0.156111	0.250444		0.10875	0.142818	0.645933	0.371	0.282067
	WT	2		0.0115556	0.00655556	0.0279375	0.0186667	0.00783333	0.128067	0.488889	0.458944	0.733294	0.378722	0.576875	0.423375	0.563889	0.7014
	WT	3	-0.00192857	0.00816667	0.0160769	0.118357	0.226	0.476071	0.685692	0.641125	0.638176	0.514167	0.4675	0.164231	0.5135	0.5414	0.877412
	WT	4	0.00326667	0.0276154	0.019	0.0278824	0.0206429	0.00670588	0.123765	0.368571	0.297133	0.812636	0.750929	0.434818	0.616929	0.309667	0.540786
	WT	5	0.000666667	0.0051875	0.0187647	0.366778	1.11925	0.146462	0.509769	0.729222	0.37025	0.628067	0.513933	0.660133	0.565077	0.312	0.572786
	WT	6	0.0576667	0.102294	0.227474	0.504357	0.6895	0.366687	0.4612	0.611357	0.415687	0.583692	0.653077	1.00859	0.821667	0.695133	0.6776
	WT	7	0.018	0.0291333	0.132533	0.243412	0.154	0.0957333	0.393833	0.526786	0.699	0.729625	0.7064	0.714	0.914938	0.574857	0.668
	WT	8	0.005	0.0608125	0.523353	0.4676	0.845353	0.392842	0.283929	0.403278	0.339429	0.494765	0.250077	0.460067	0.405727	0.80875	0.789
	WT	9	0.0347857	0.116857	0.695538	0.756	0.868	0.417563	0.277333	0.415312	1.22873	0.604	0.559562	0.254	0.687357	0.562842	1.12875
	WT	10	0.0260667	0.157571	0.399647	0.303583	1.07579	0.519333	0.3529	0.6458	0.8444	0.702	1.308	1.142	0.714857	0.905143	1.164
	WT	11			0.013375	0.351765	0.259467	0.305	0.351353	1.1548	1.09122	0.3435	0.598571
	WT	12	-0.001625		0.0035625	0.0186	0.04	0.00945455	0.0934375	0.0630556	0.16325	0.496643	0.268063	0.3105	0.449143	0.442765	0.594438
	WT	13	-0.00135294	0.016	0.2225	0.239687	0.282357	0.183333	0.537	0.553533	0.707933	0.342765	0.298333	0.446267	0.703385	0.376688	0.0084
	WT	14	0.0296667	0.0223571	0.1885	0.228615	0.254353	0.417143	0.305667	0.4196	0.813813	0.745583	0.36575	0.398154	0.754	0.650556
	WT	15	0.03425	0.349333	0.270077	0.766	0.998818	0.768588	0.808571	1.03617	0.843	1.41727	0.873692	0.8077	1.35471	0.925889	1.05238
	MUT	1	0.00988235	0.00194444	0.00325	0.00764706	0.0142	0.00175	0.00642105	0.005	0.0274615	0.0344286	0.0223571	0.137214	0.461667	0.570667	0.514
	MUT	2	0.00361111	0.0209375	0.00154545	0.0289286	0.0161818	0.0475	0.0968889	0.0736	0.118625	0.297133	0.287929	0.251667	0.372687	0.2138	0.426375
	MUT	3	0.01825	0.023375	0.0121667	0.0177333	0.04	0.028125	0.0947333	0.181917	0.432067	0.5876	0.307812	0.505389	0.481059	0.7461	0.676474
	MUT	4	0.0131765	0.00323529	0.00106667	0.0102667	0.135714	0.150071	0.148867	0.364333	0.262455	0.281333	0.7585	0.7146	0.759333	0.696765
	MUT	5	0.0261333		0.0180667	0.0224286	0.0415294	0.0948125	0.032375	0.092	0.19245	0.32875	0.455429	0.701	0.647667	0.376294
	MUT	6	0.0124545	0.0201875	0.0428667	0.0215	0.1162	0.199429	0.0845	0.564692	0.542143	0.553071	0.497636	0.3752	0.85125	0.326222	0.661944
	MUT	7	0.0115	0.0483529	0.2264	0.674562	0.316333	0.387867	0.645923	0.514937		0.867071	1.23043	0.7875	1.06733	0.7765	0.960222
	MUT	8	0.00523529	0.00158824	0.0529444	0.175467	0.1455	0.053	0.304059	0.305688		0.608615	0.221733		0.781385	0.923538	0.620111
	MUT	9	0.0336875	0.0149286	0.0281333	0.137647	0.44825	0.5315	0.940375	0.925625	0.6455	1.02371	0.6696	0.74775	0.856667	0.540643	0.737467
	MUT	10	0.00566667	0.0273333	0.105923	0.0228462	0.722733	0.252937	0.42515	0.350714	0.450824	0.275294	0.318765	0.684889	0.614067	0.2556	0.171214
	MUT	11	0.00676923	0.026	0.339722	0.439571	0.575111	0.578667	0.873278	0.849813	0.706417	1.13915	0.694688	0.758333	0.391154	0.975389	0.9865
	MUT	12	0.0129286	0.0113077	-0.000764706	0.0116	-0.00338889	0.0224286	0.211938	0.28275	0.406824	0.5625	0.274636	0.2642	0.206933	0.471667	0.254625
	MUT	13	0.0174211	0.0153125	0.004	0.0680909	0.4077	0.394769	0.3415	0.990067	0.4785	0.521462	0.430125	0.331444	0.7758	0.3665	0.489846
	MUT	14	0.008	0.0138235	-0.000117647	0.0413571	0.06455	0.128562	0.360625	0.606471	0.5232	0.593625	0.46225	0.567	0.379176	0.412286	0.000571429
	MUT	15	0.00257143	-0.017	0.00613333	0.0705625	0.118938	0.00264286	0.128941	0.229474	0.401895	0.278222	0.314786	0.317312	0.370556	0.321667	0.193824
	WT	Average	0.0159373	0.0699187	0.182502	0.294931	0.45998	0.276296	0.35959	0.547574	0.610761	0.653429	0.540091	0.537154	0.683614	0.574327	0.696693
		sem	0.00527566	0.0270003	0.0554755	0.0640636	0.108421	0.0592649	0.0554825	0.0737292	0.0816931	0.07038	0.077295	0.080499	0.0653838	0.0547869	0.0902179
	MUT	Average	0.0124858	0.0150948	0.0560891	0.116681	0.210637	0.191604	0.313038	0.422472	0.399105	0.530132	0.463112	0.51025	0.601116	0.531576	0.51486
		sem	0.00221542	0.0040907	0.0255112	0.0491858	0.0589591	0.0502899	0.076358	0.0805514	0.0554301	0.0778909	0.0743329	0.0602514	0.0626224	0.0624145	0.0836278
	WT : littermate controls
	MUT : pcp2Cre;TRPC3fl/fl

## Sheet: Statistics
	Session #	CR percentage			Fraction eyelid closure
		t-value	df	P-value	t-value	df	P-value
	1	0.046	28	0.963	-0.404	28	0.689
	2	1.35	28	0.189	0.387	28	0.702
	3	2.3	28	0.029	1.75	28	0.092
	4	3.5	28	0.002	2.46	28	0.02
	5	2.43	28	0.022	3.64	28	0.001
	6	2.27	28	0.031	1.25	28	0.223
	7	1.53	28	0.138	0.508	28	0.615
	8	1.91	28	0.066	1.52	28	0.139
	9	1.25	28	0.22	2.75	28	0.01
	10	0.577	28	0.569	1.38	28	0.179
	11	0.701	28	0.489	1.51	28	0.141
	12	-0.08	28	0.937	0.907	28	0.372
	13	0.667	28	0.51	1.38	28	0.178
	14	0.15	28	0.882	0.353	28	0.727
	15	0.295	28	0.77	1.47	28	0.153
