# Supplementary figures and images for: TRPC3 is a major contributor to functional heterogeneity of cerebellar Purkinje cells
Source: eLife journal article supplement (doi:10.7554/elife.45590), 2019-09-05

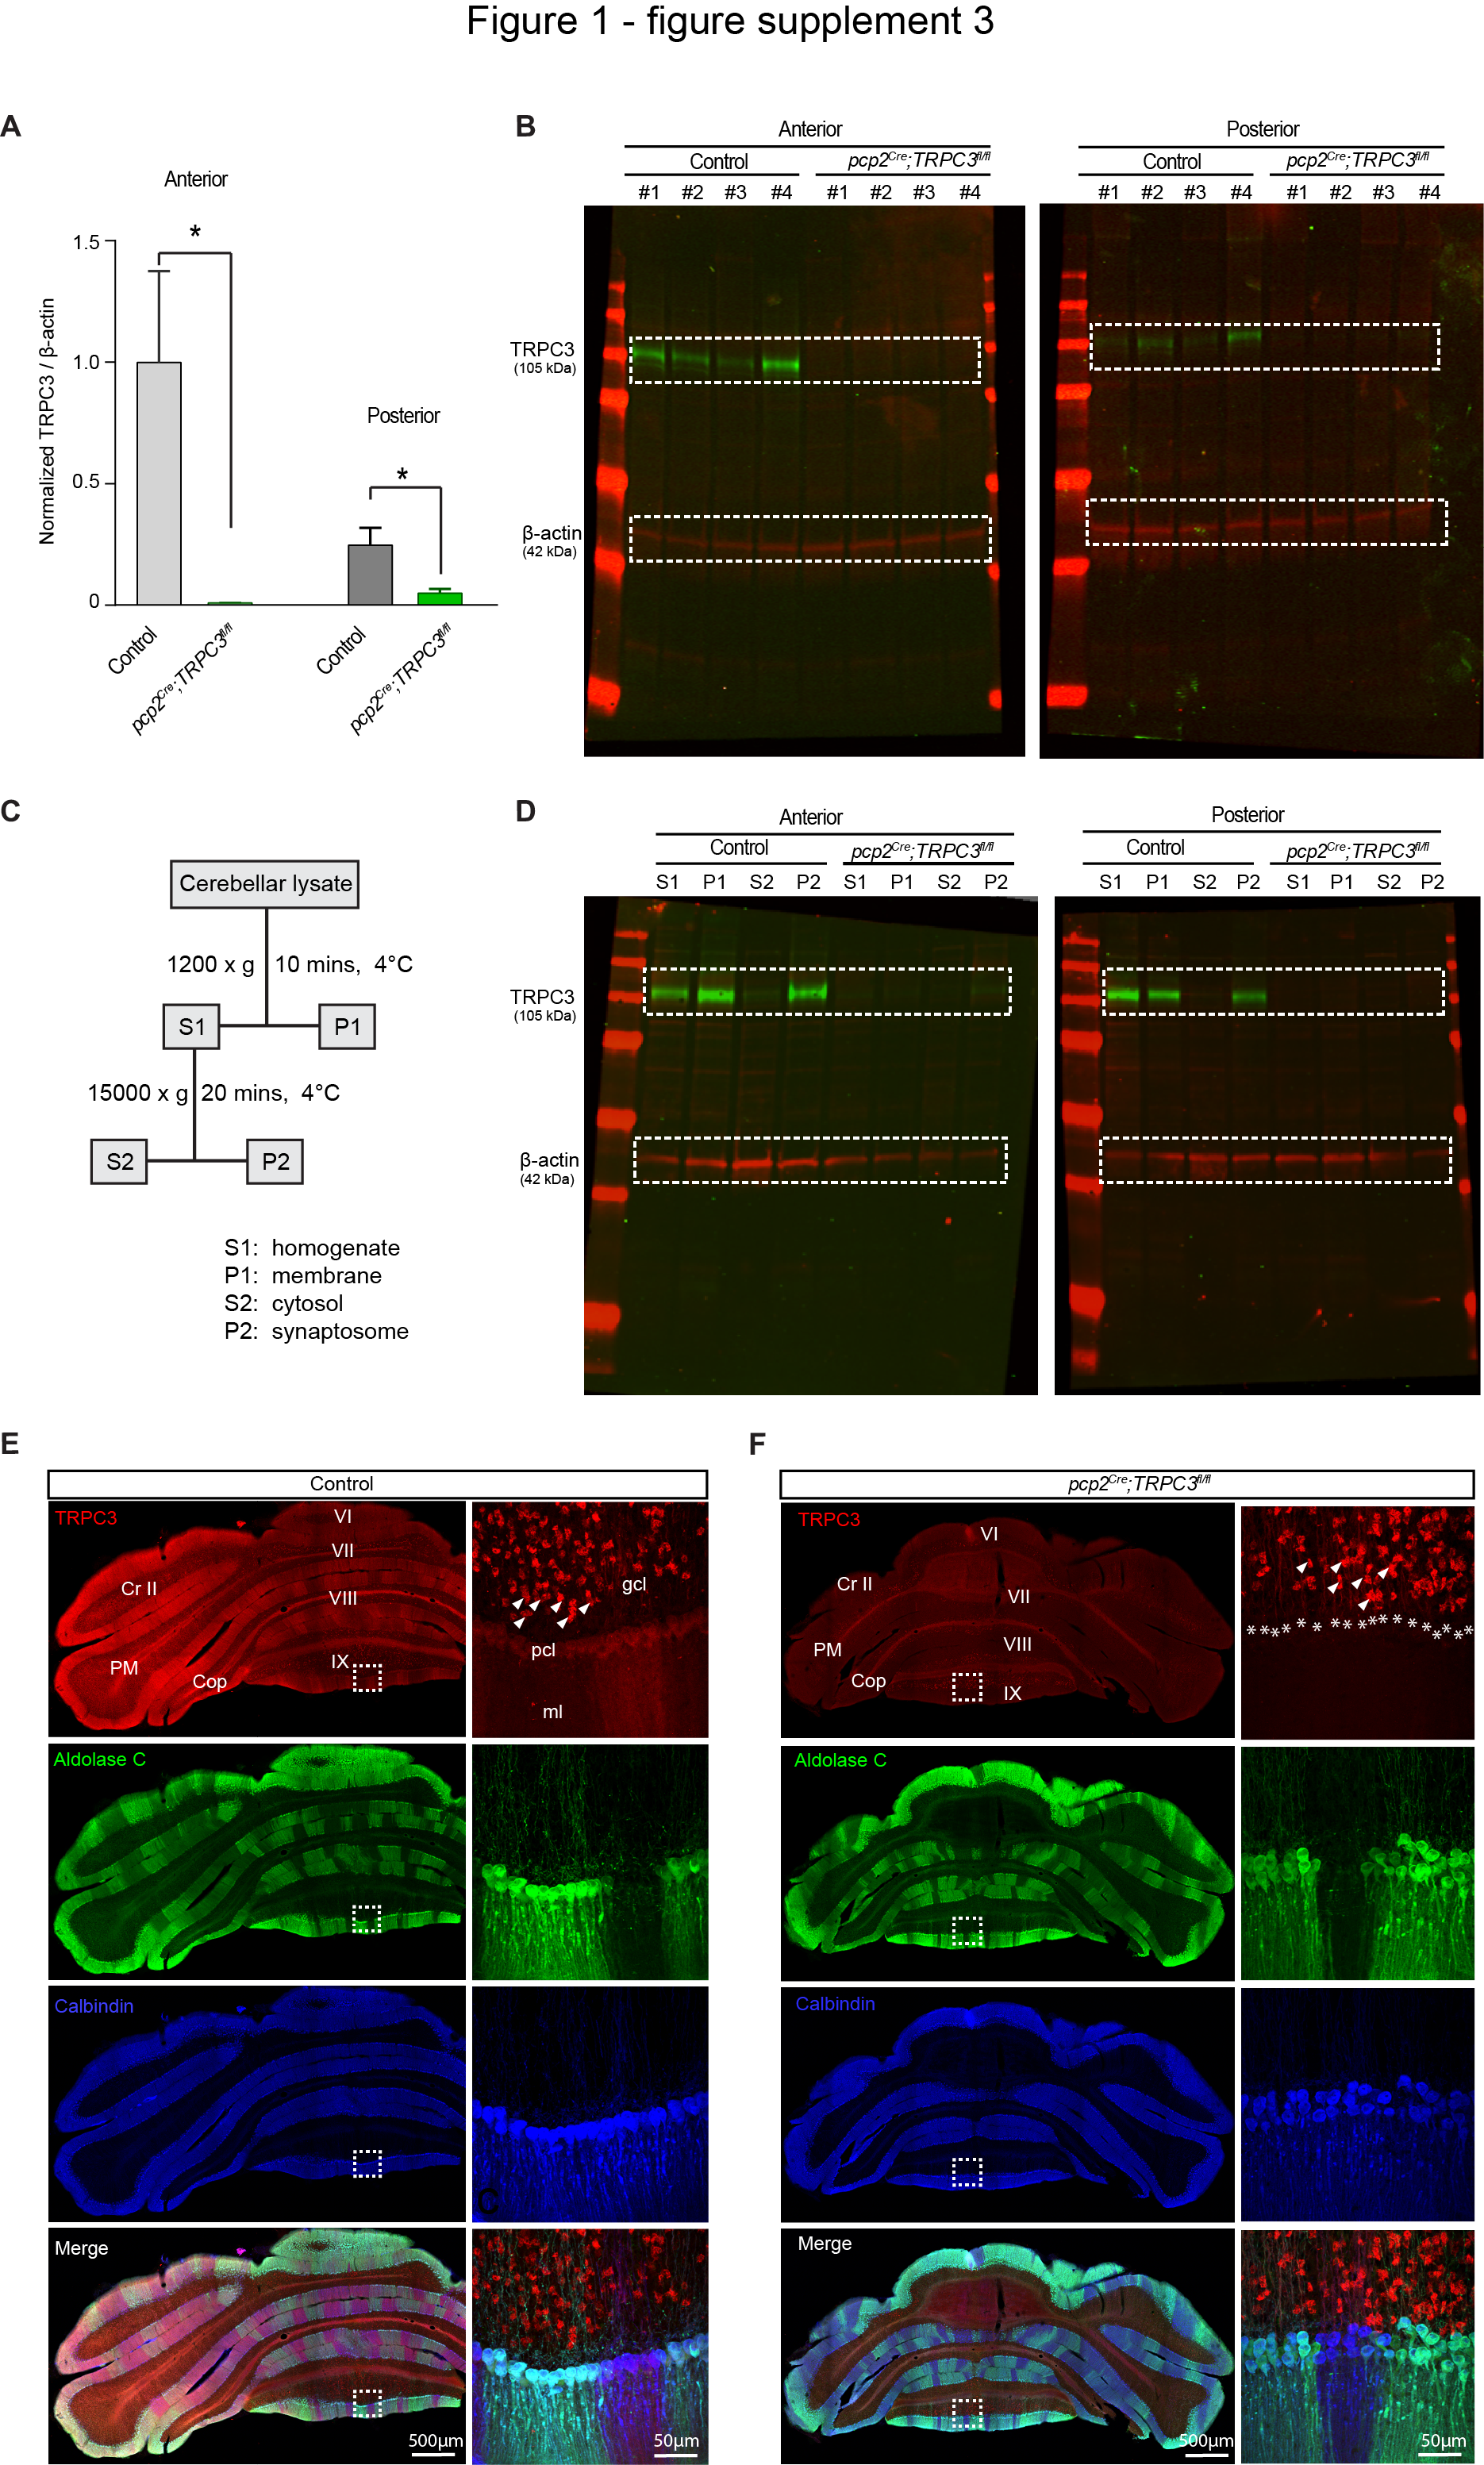

Supplement: supp [file elife-45590-supp-v1.zip › elife_poa_e45590_Figure_1_figure_supplement_3.tif]

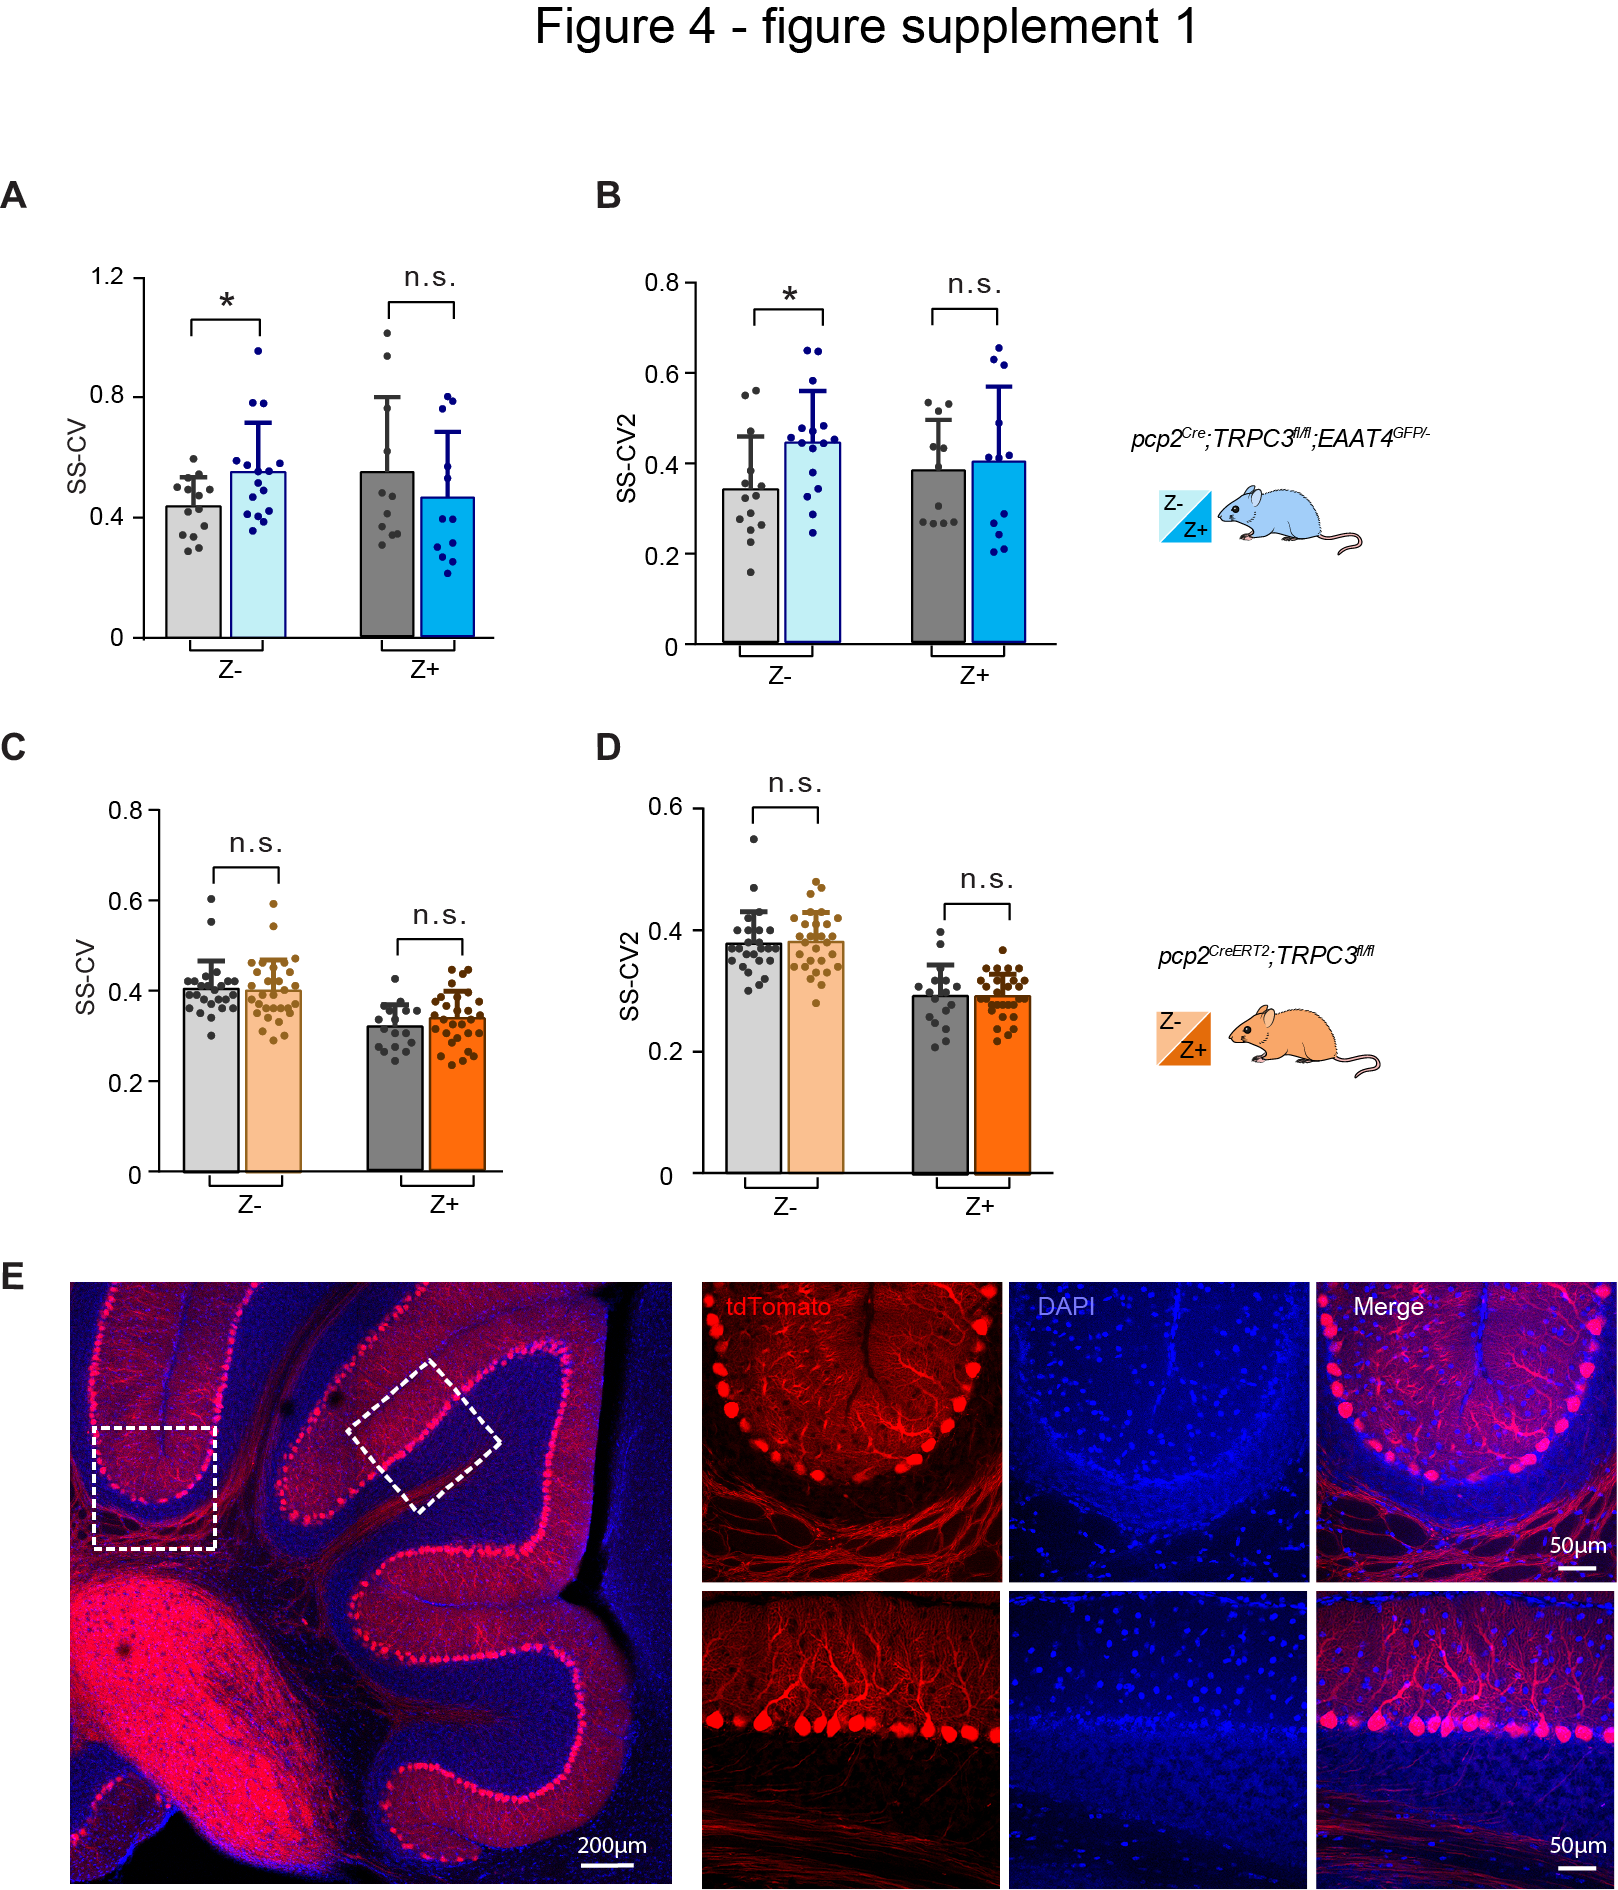

Supplement: supp [file elife-45590-supp-v1.zip › elife_poa_e45590_Figure_4_figure_supplement_1.tif]

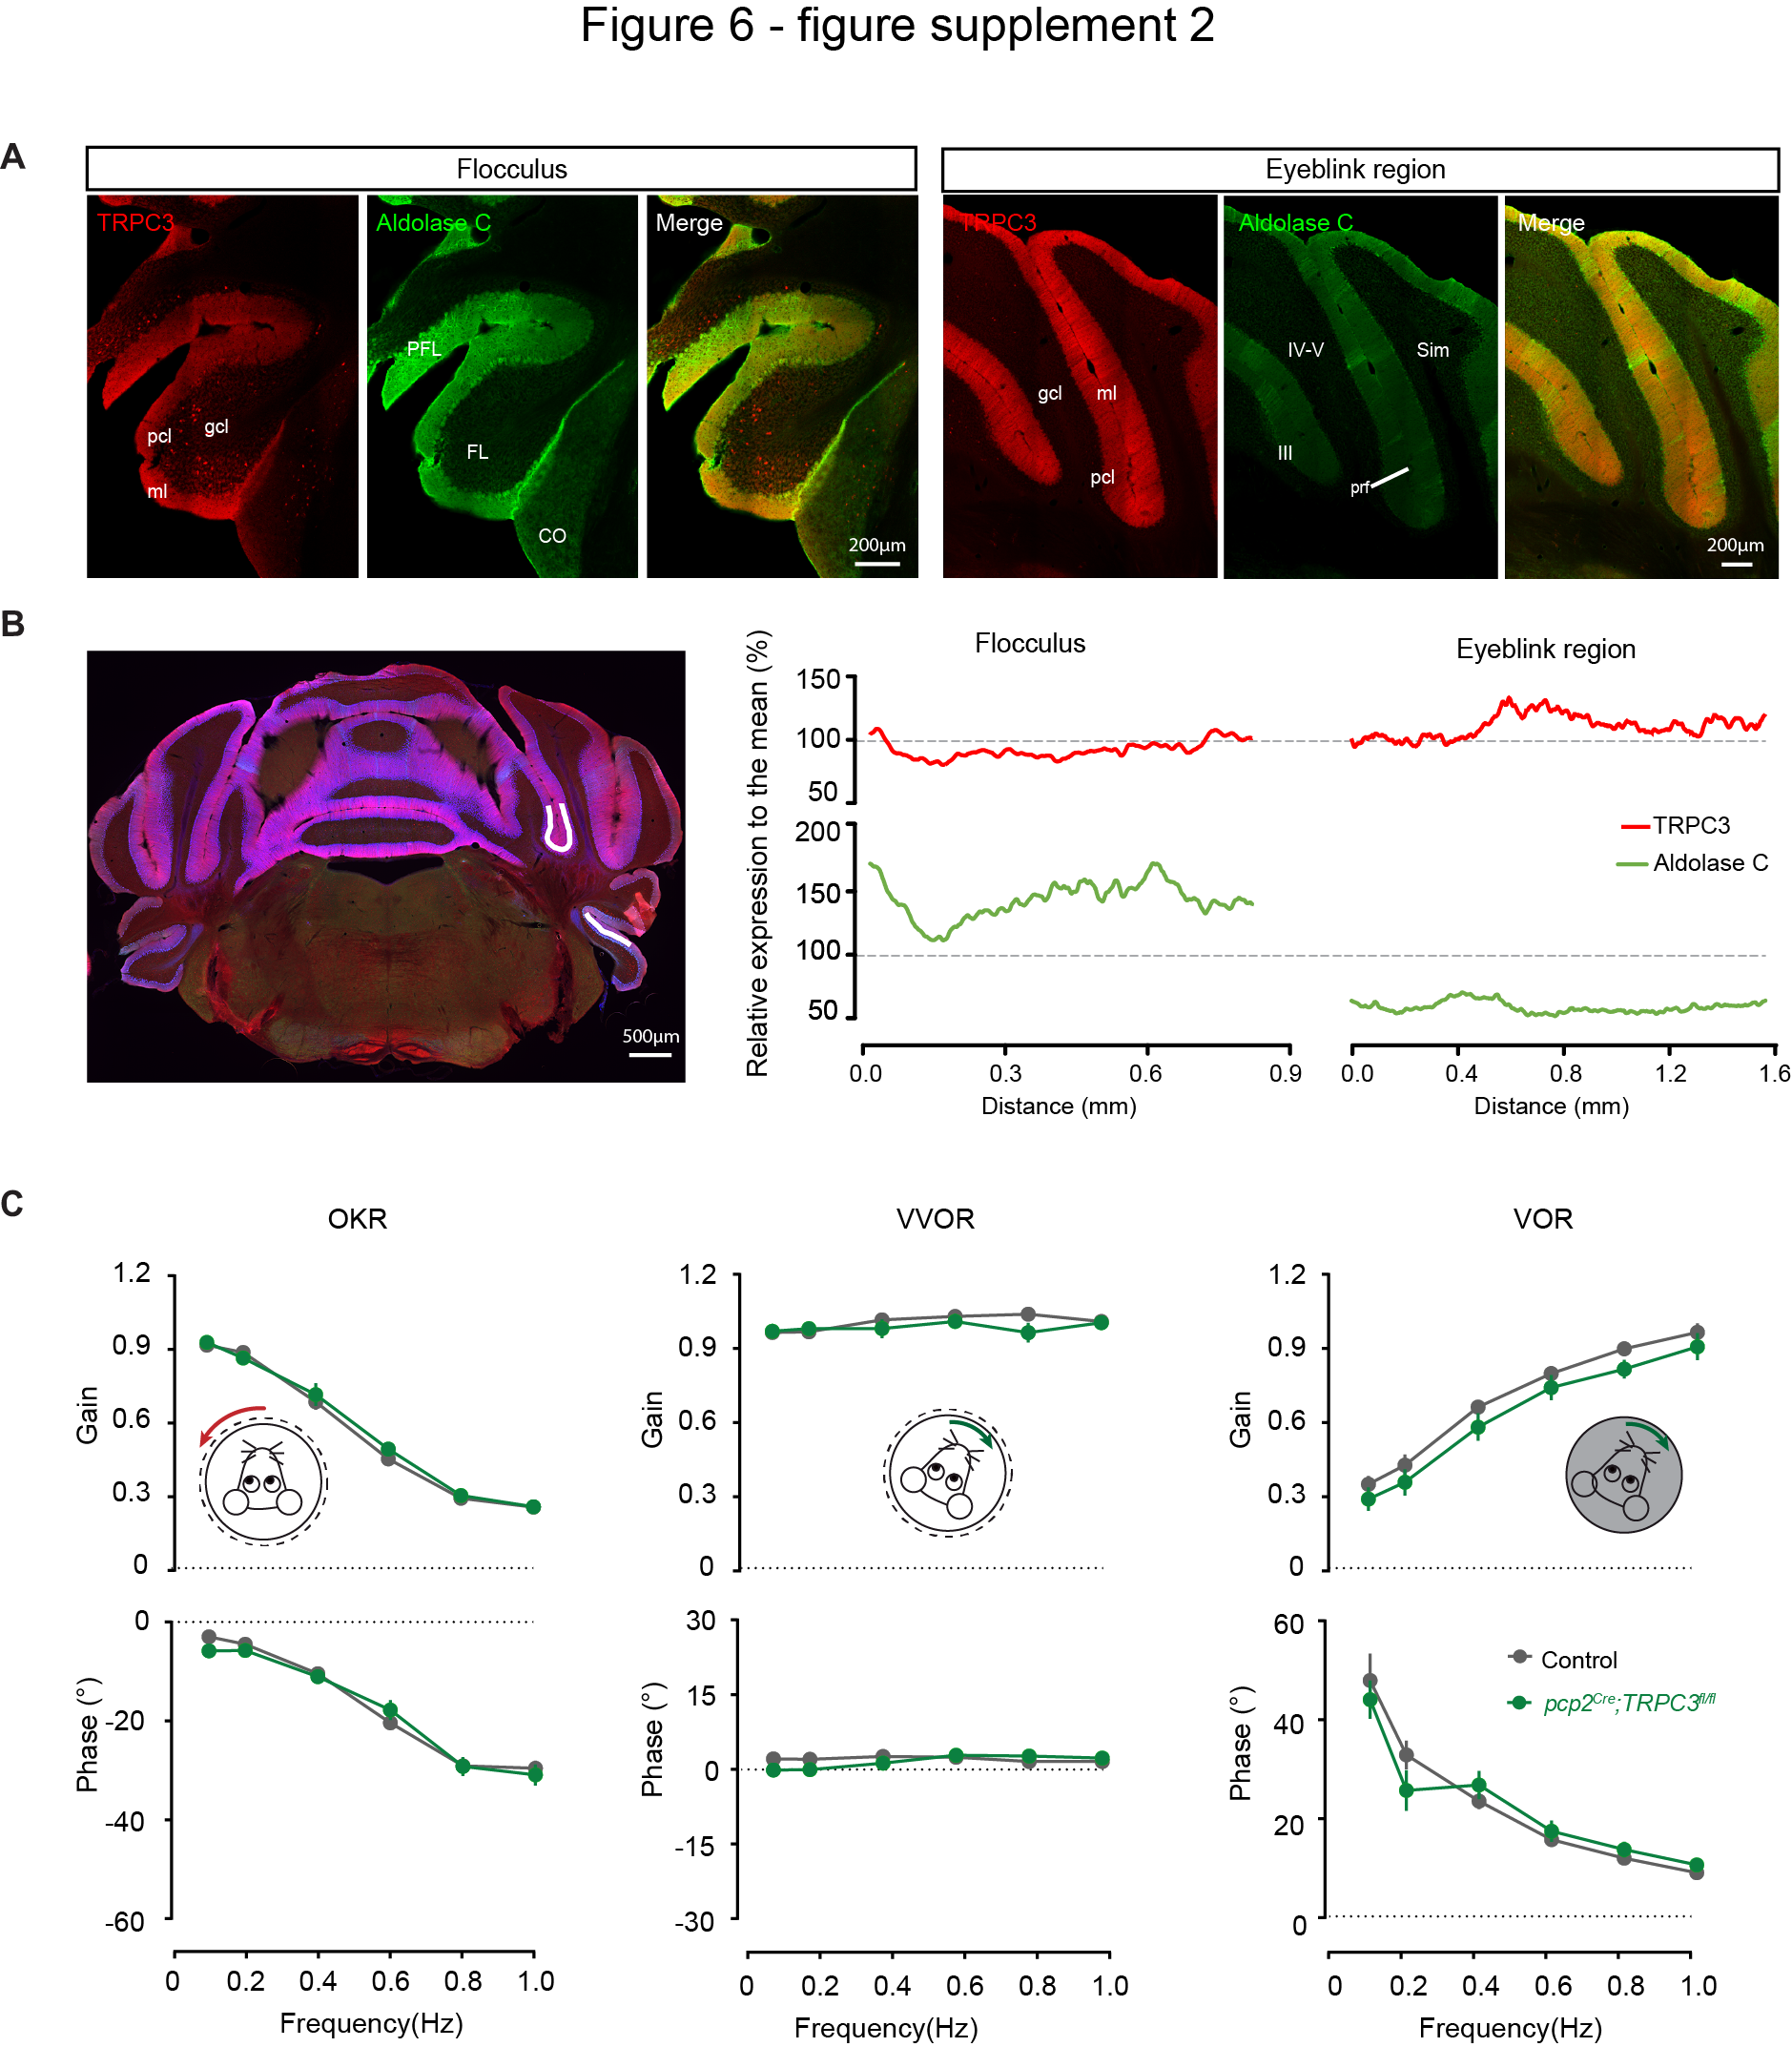

Supplement: supp [file elife-45590-supp-v1.zip › elife_poa_e45590_Figure_6_figure_supplement_2.tif]

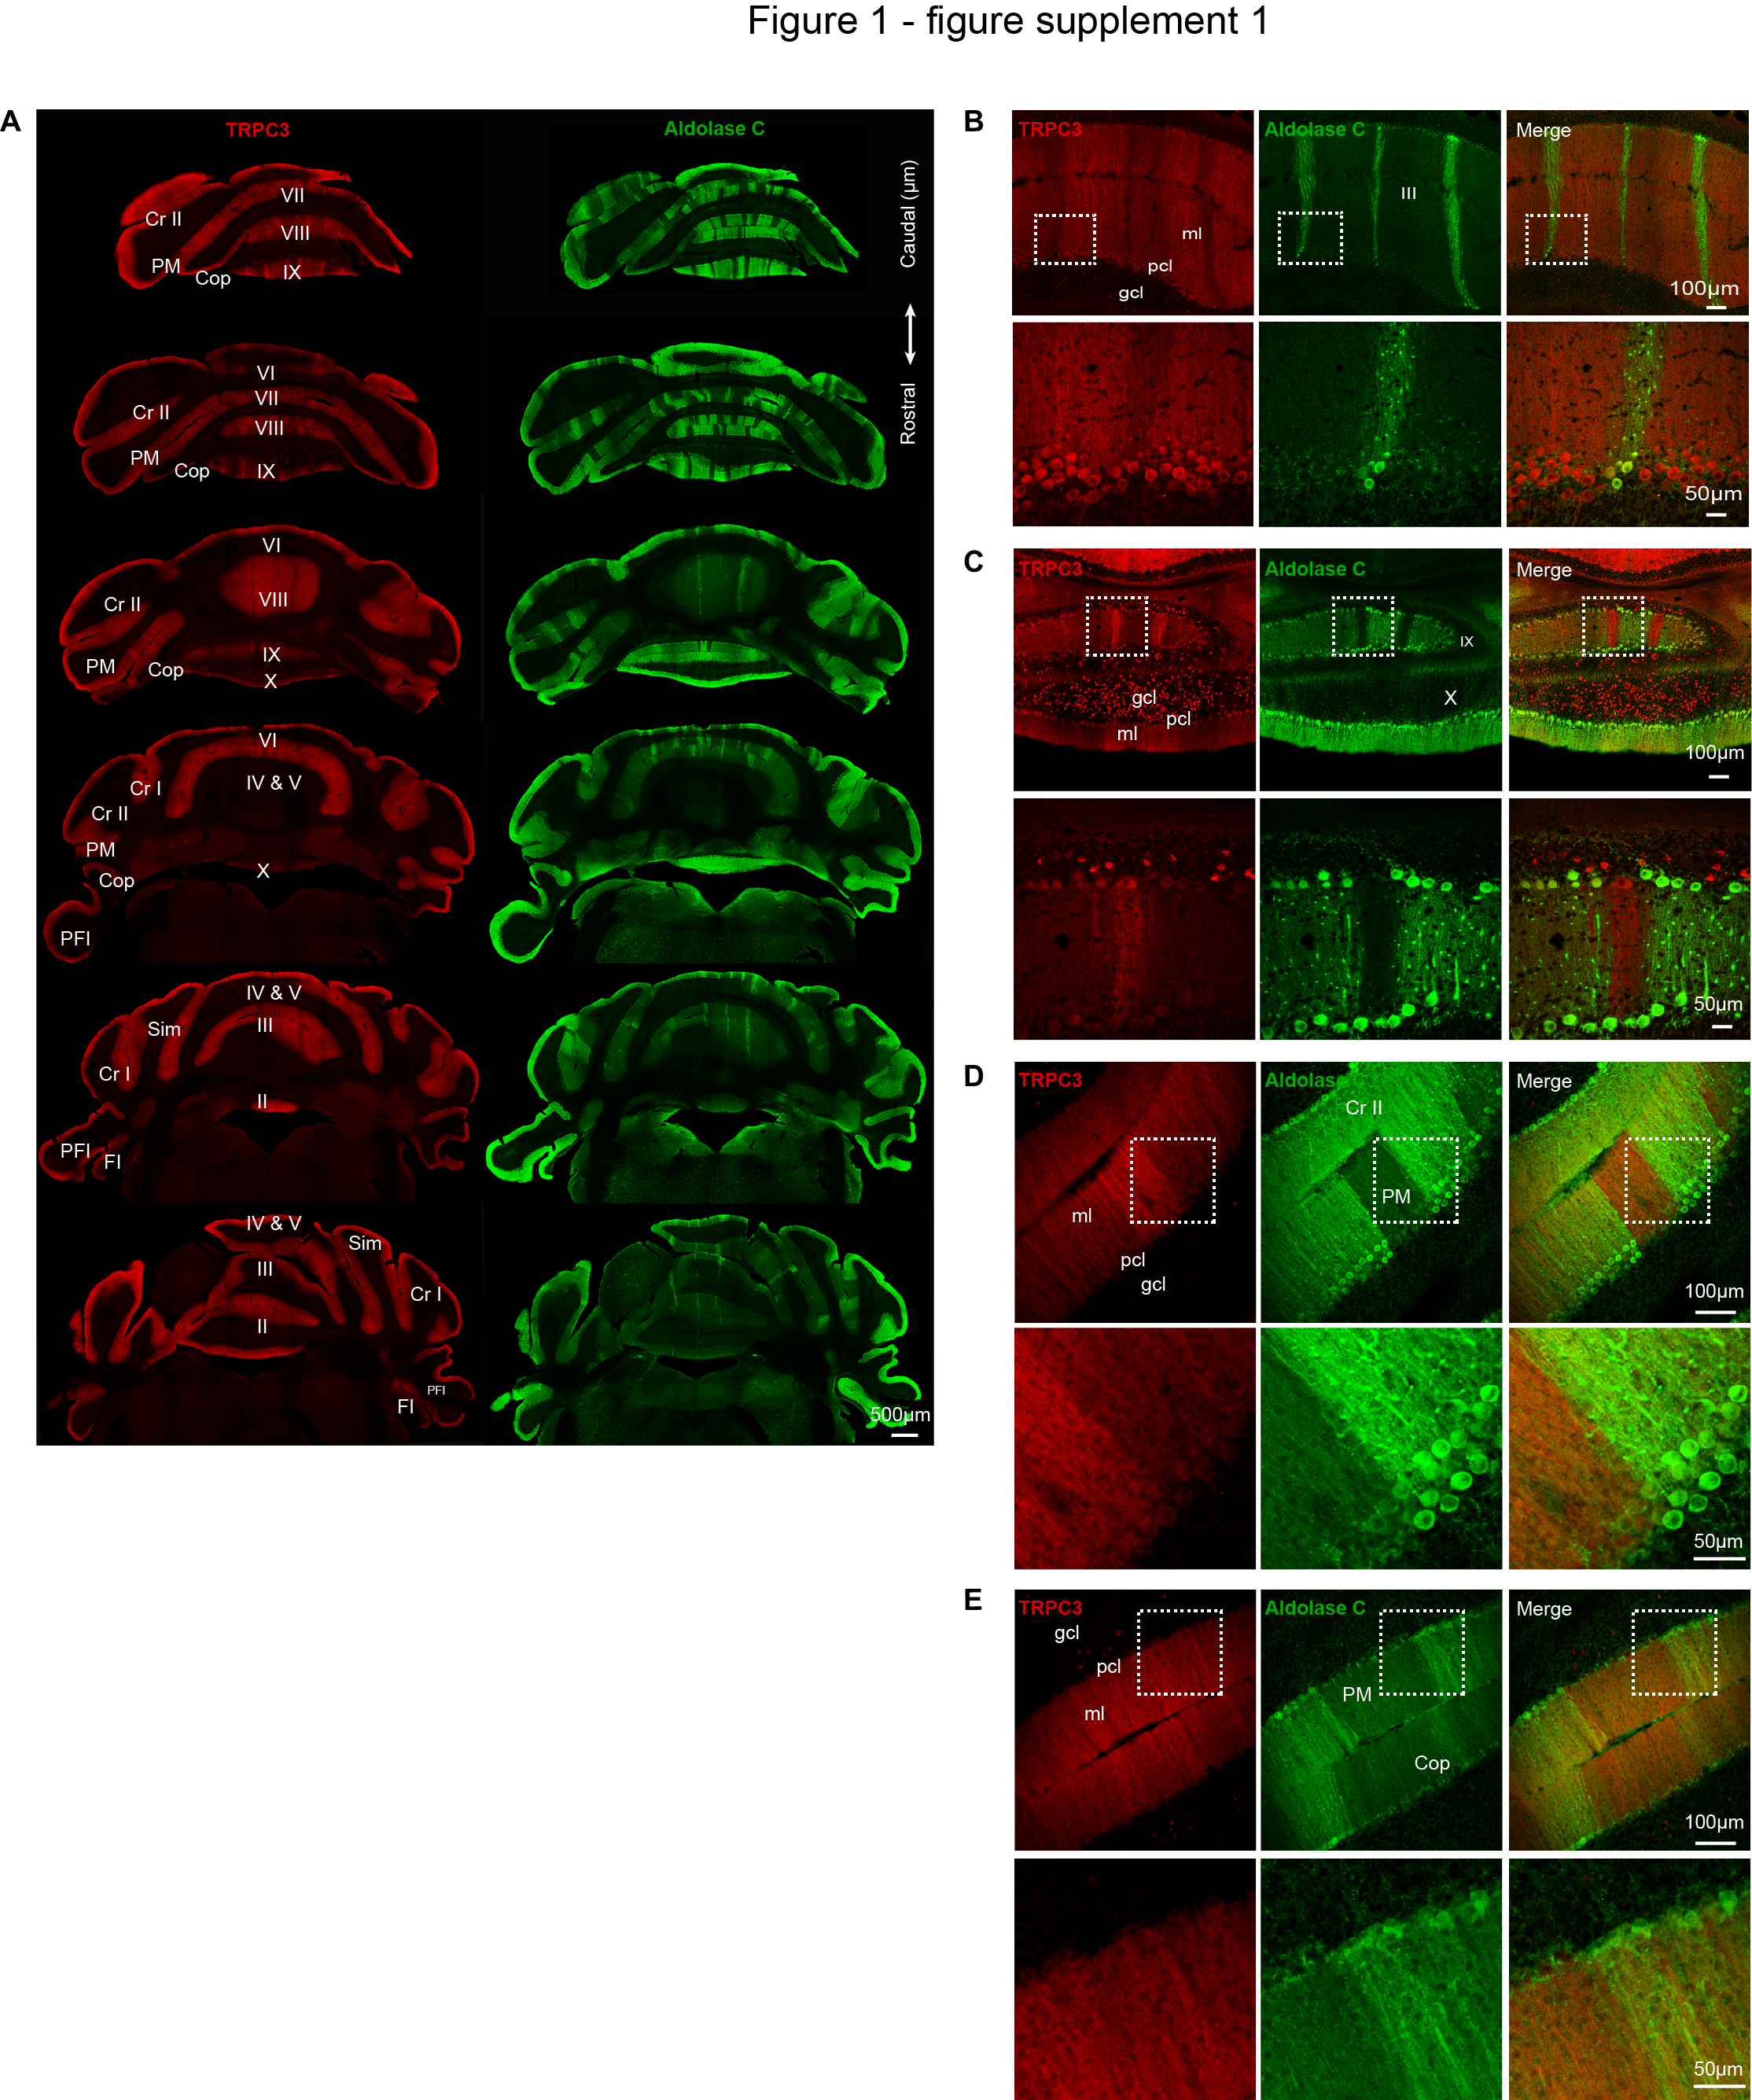

Supplement: supp [file elife-45590-supp-v1.zip › elife_poa_e45590_Figure_1_figure_supplement_1.tif]

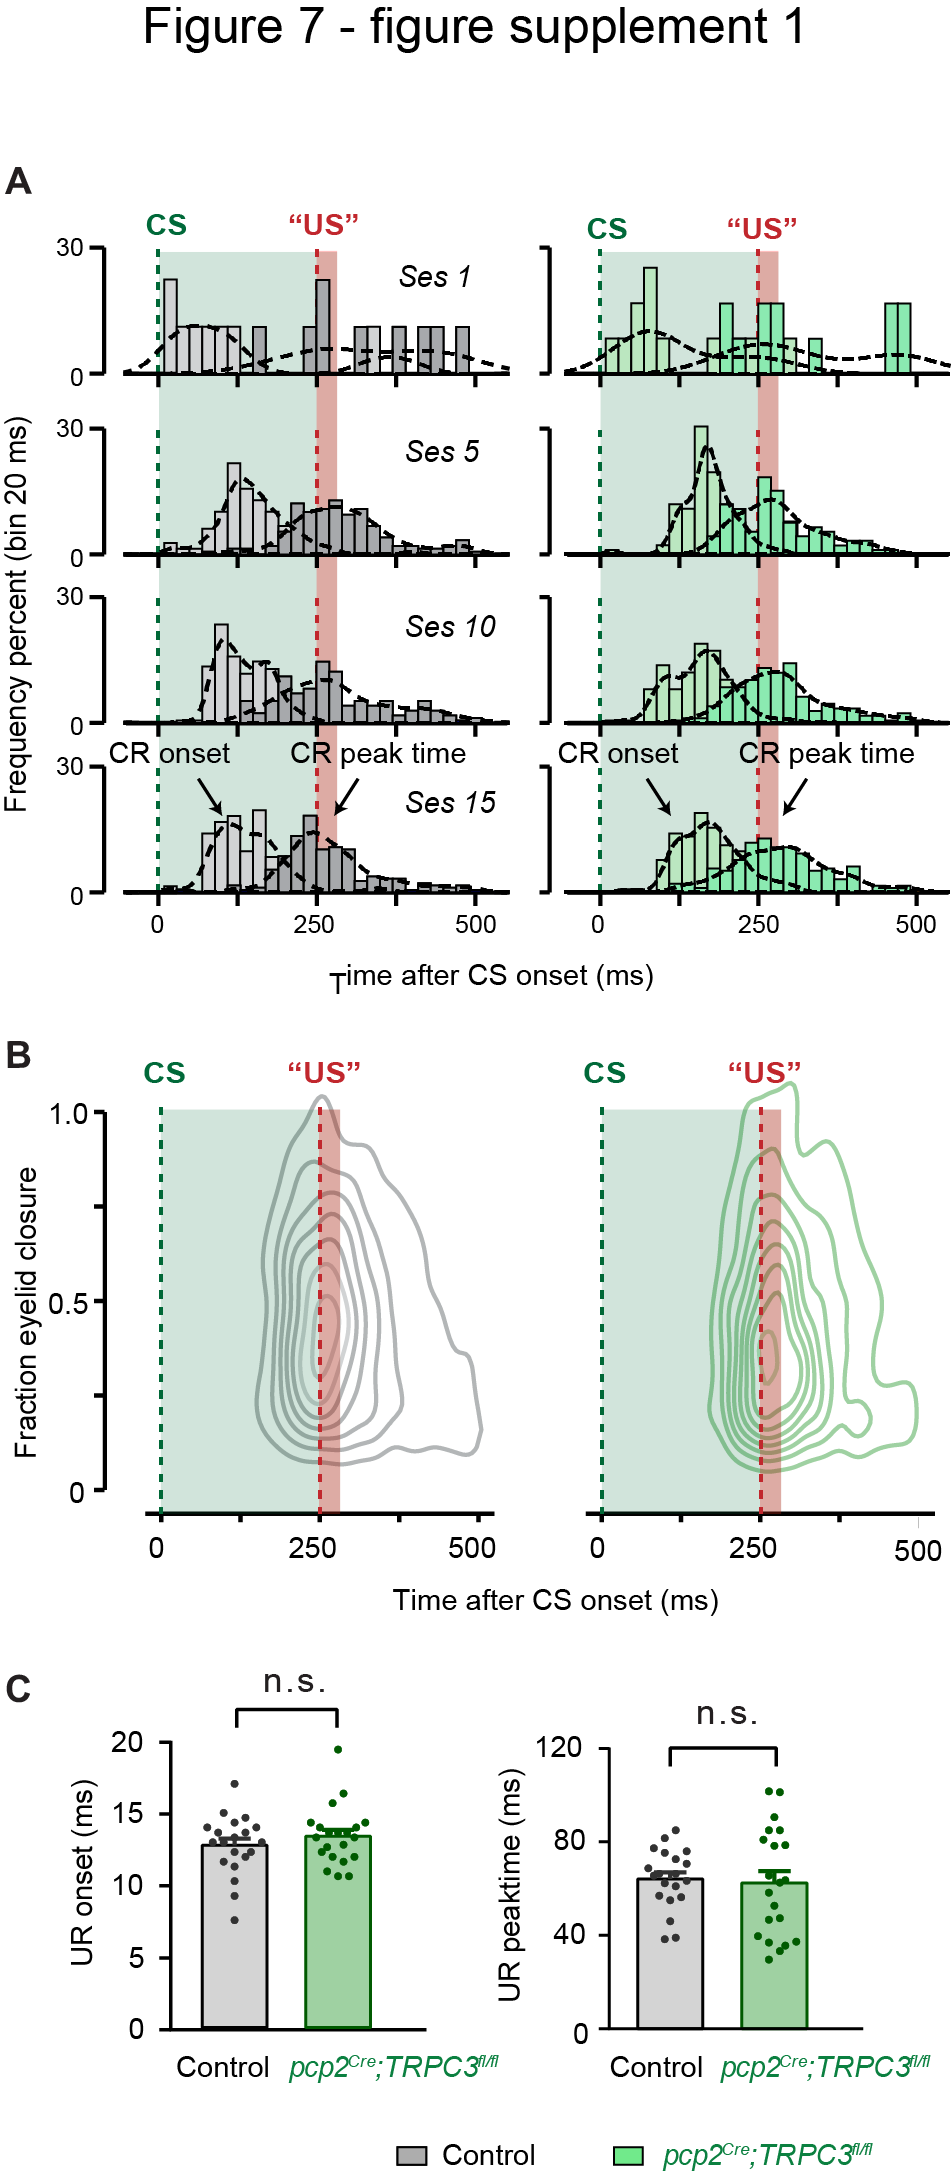

Supplement: supp [file elife-45590-supp-v1.zip › elife_poa_e45590_Figure_7_figure_supplement_1.tif]

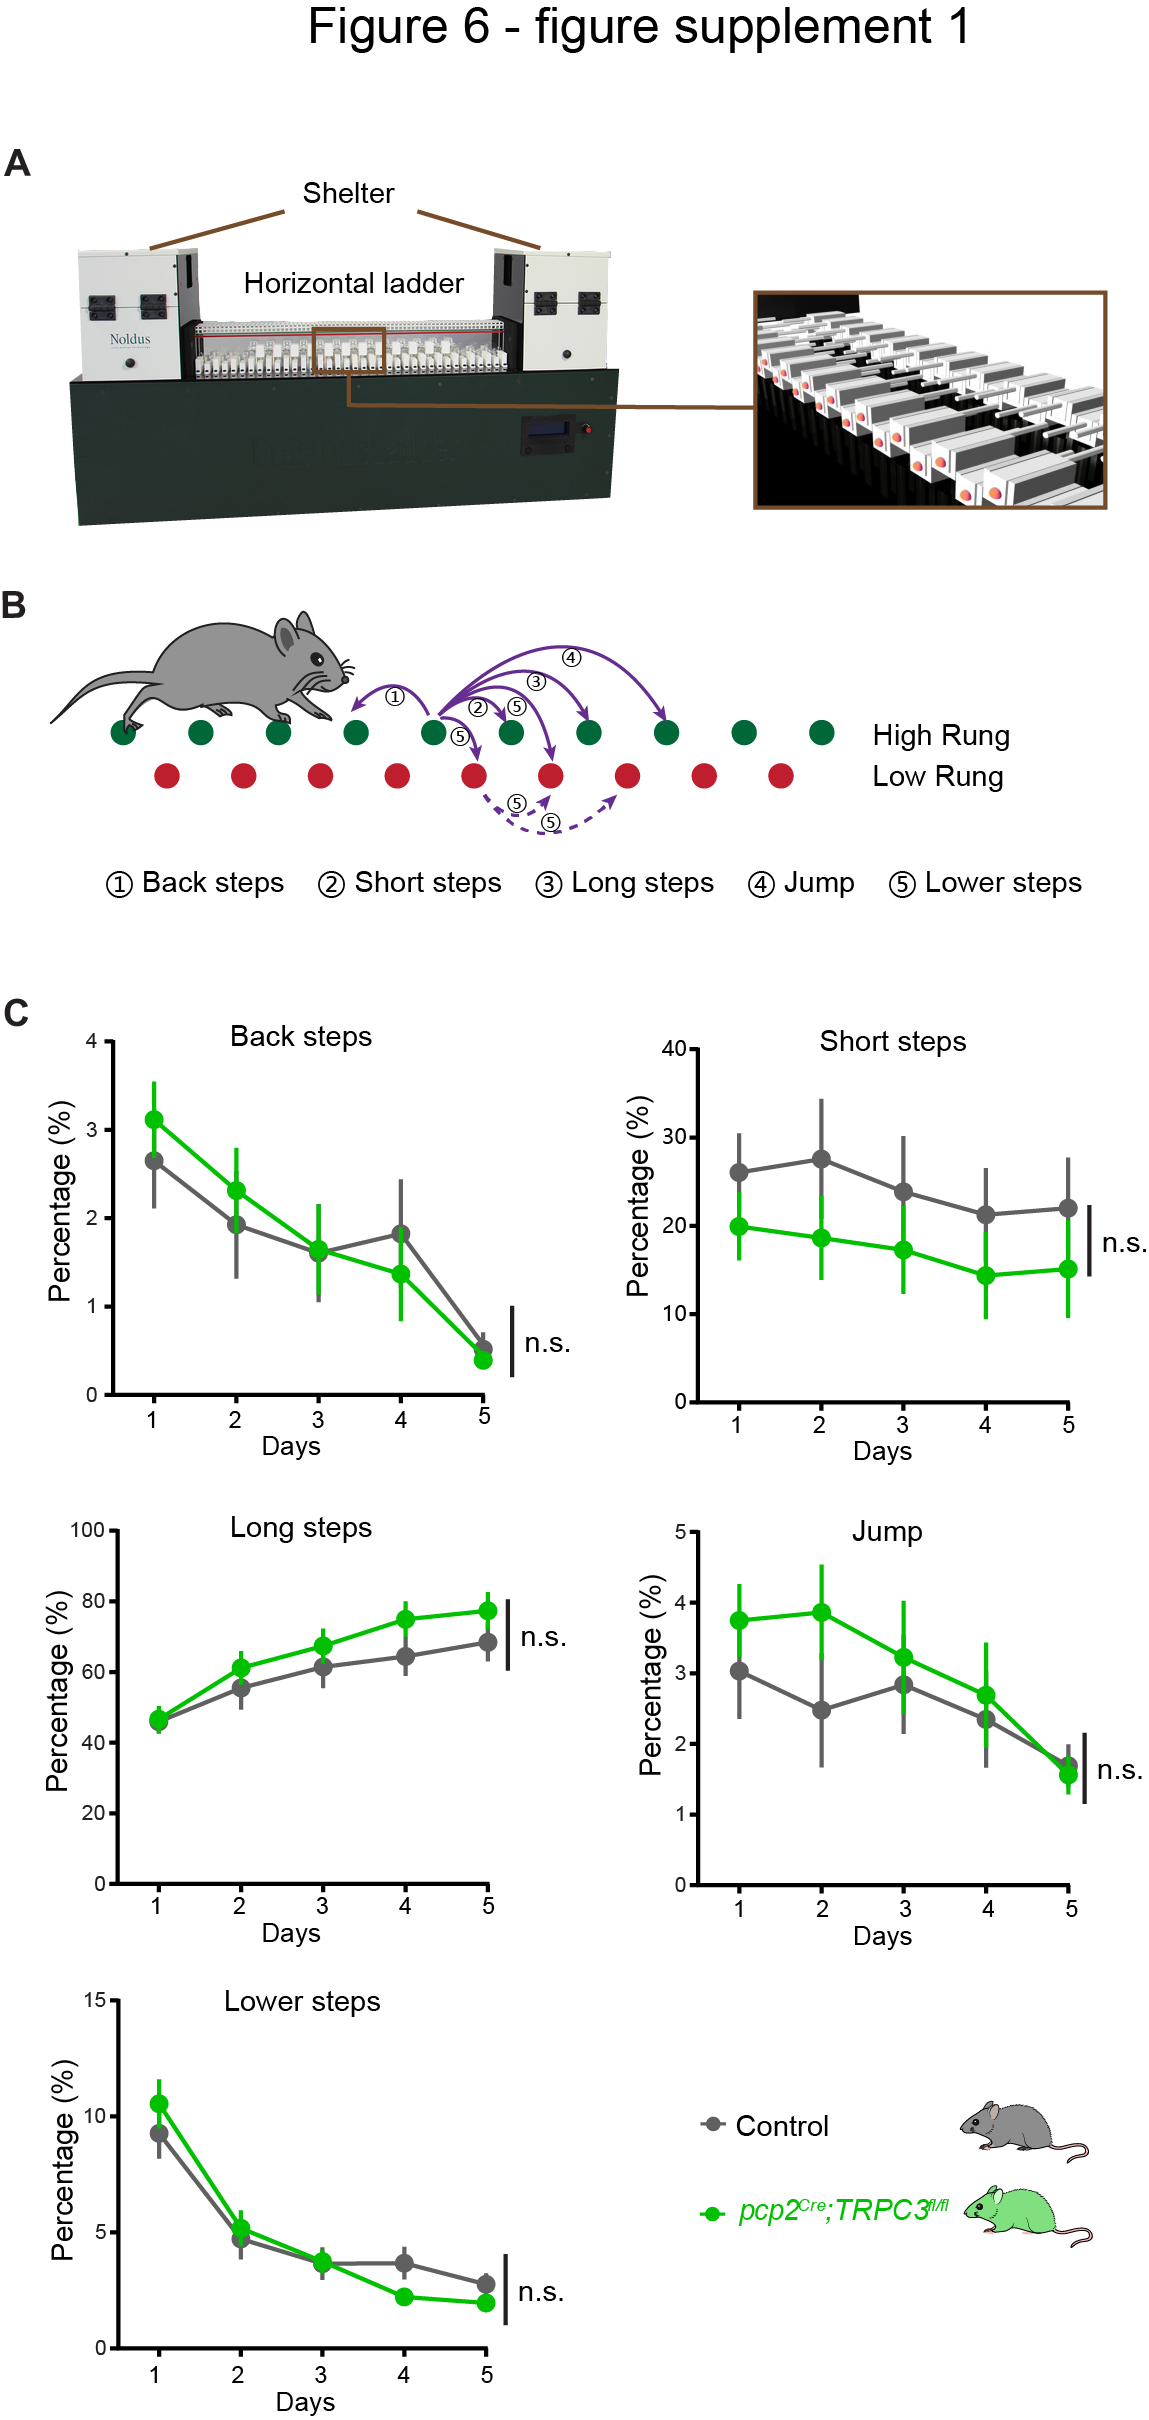

Supplement: supp [file elife-45590-supp-v1.zip › elife_poa_e45590_Figure_6_figure_supplement_1.tif]

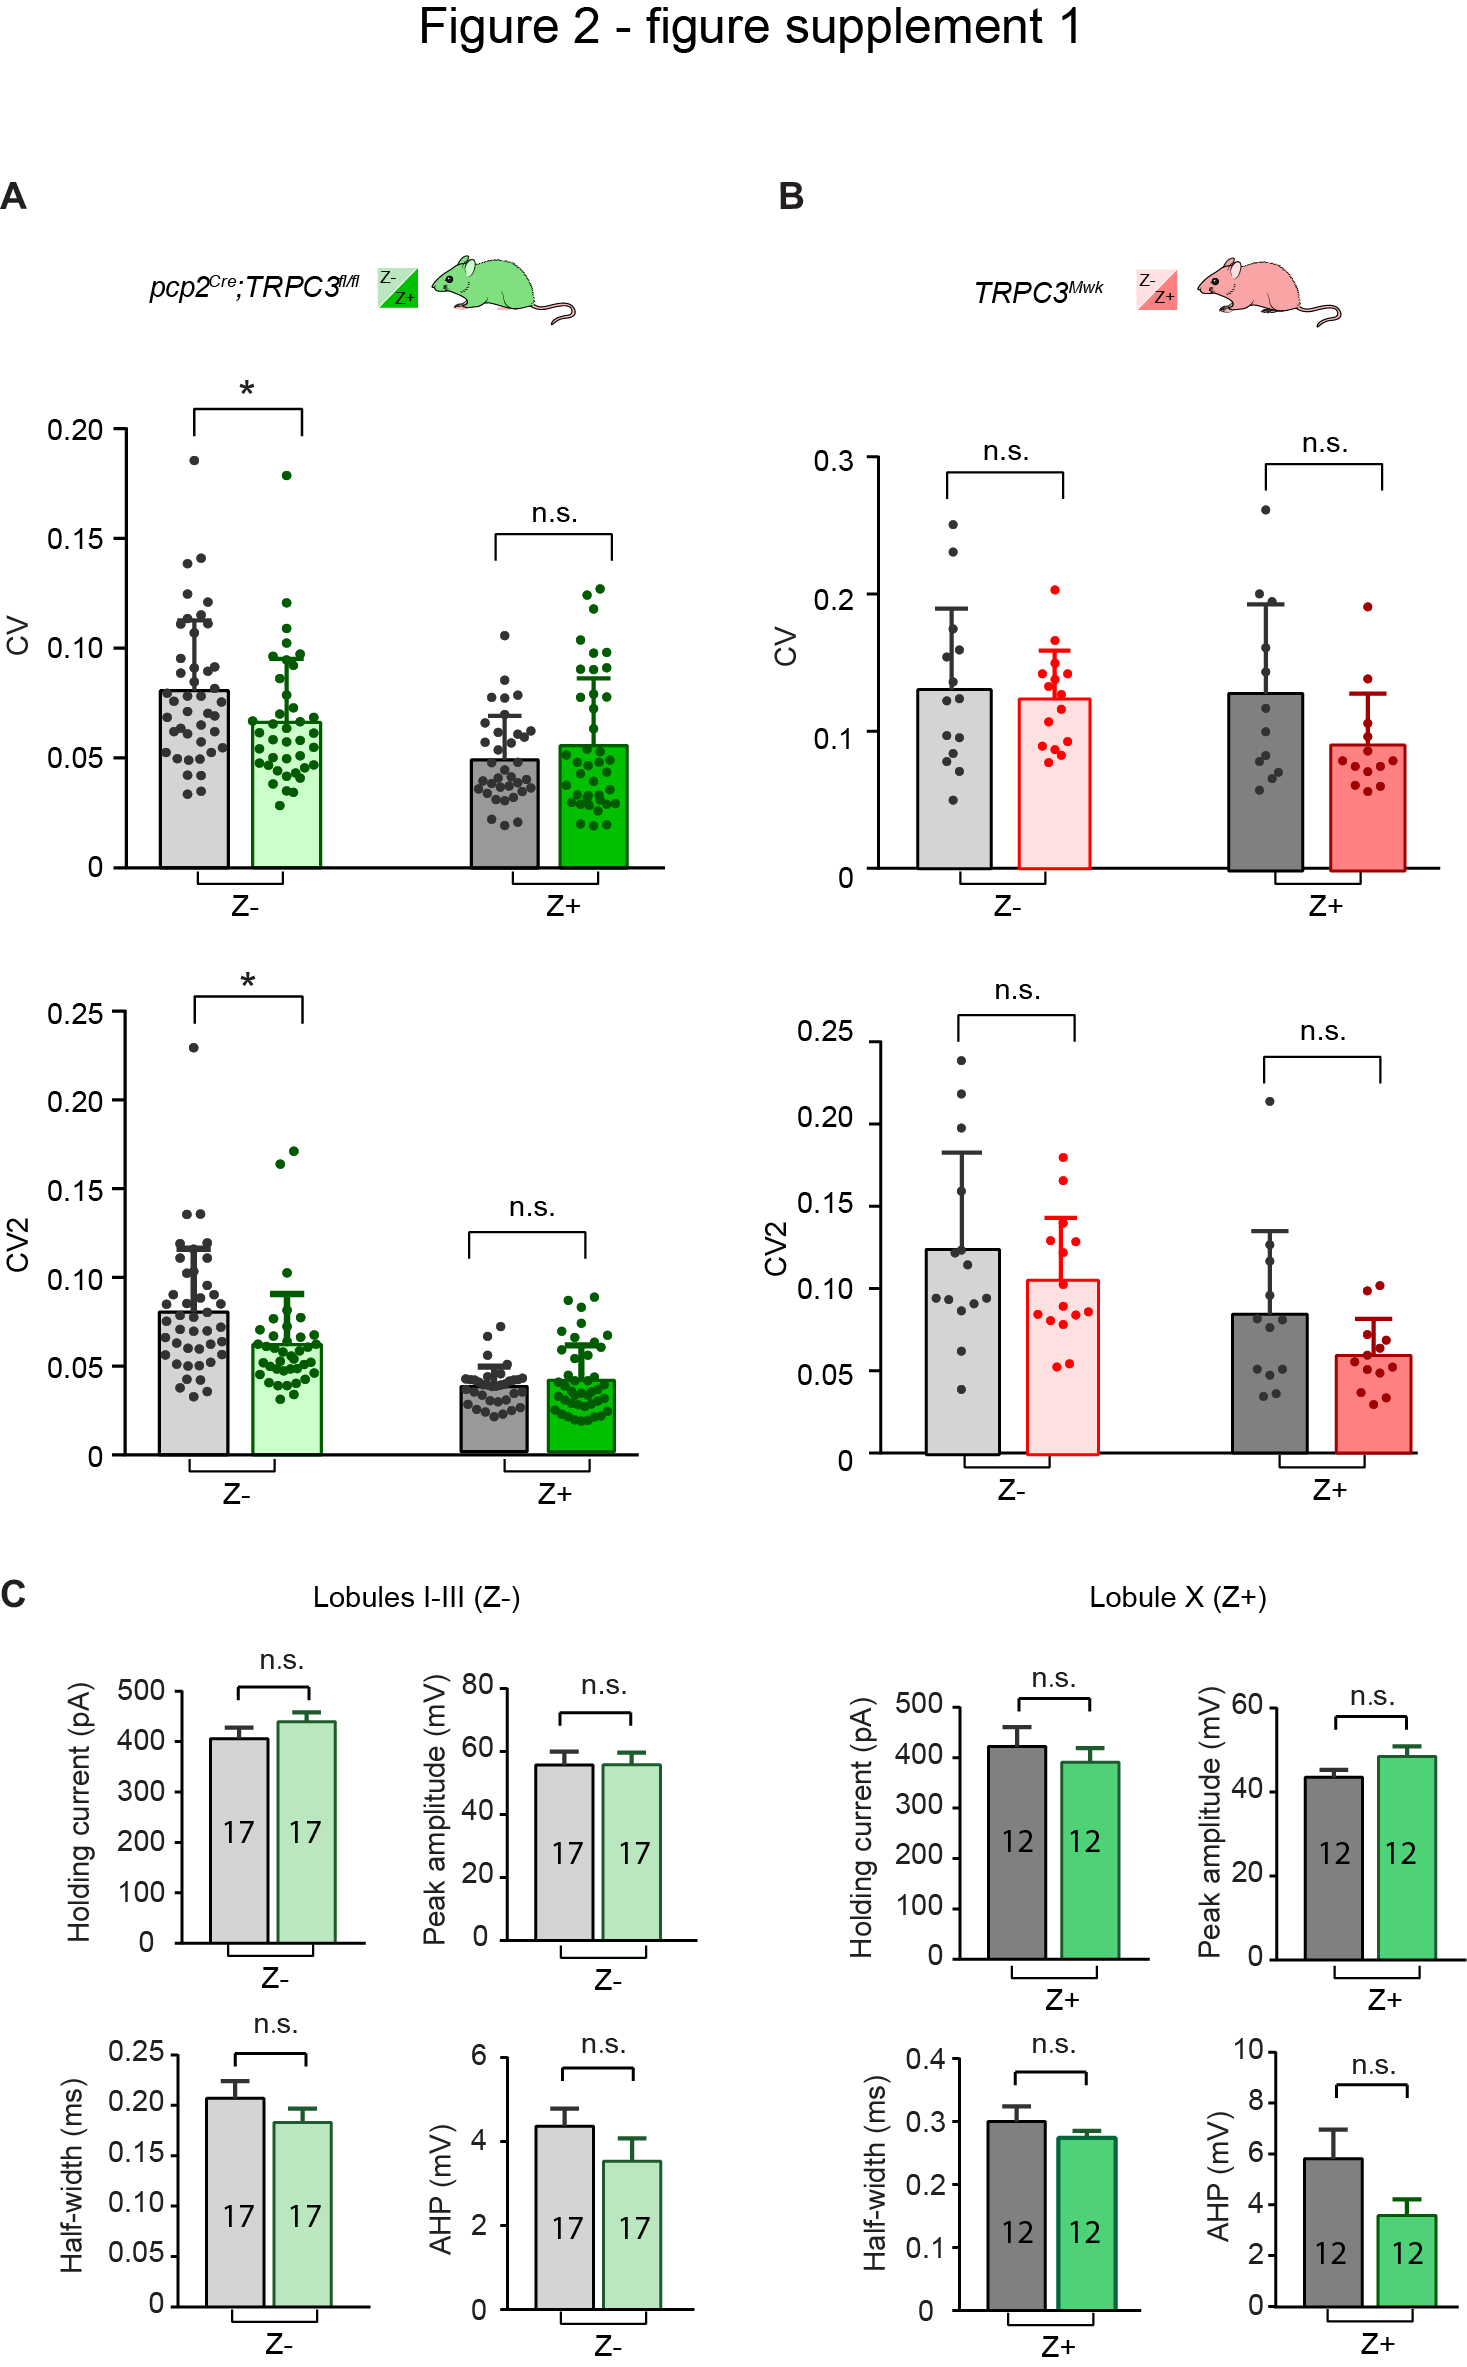

Supplement: supp [file elife-45590-supp-v1.zip › elife_poa_e45590_Figure_2_figure_supplement_1.tif]

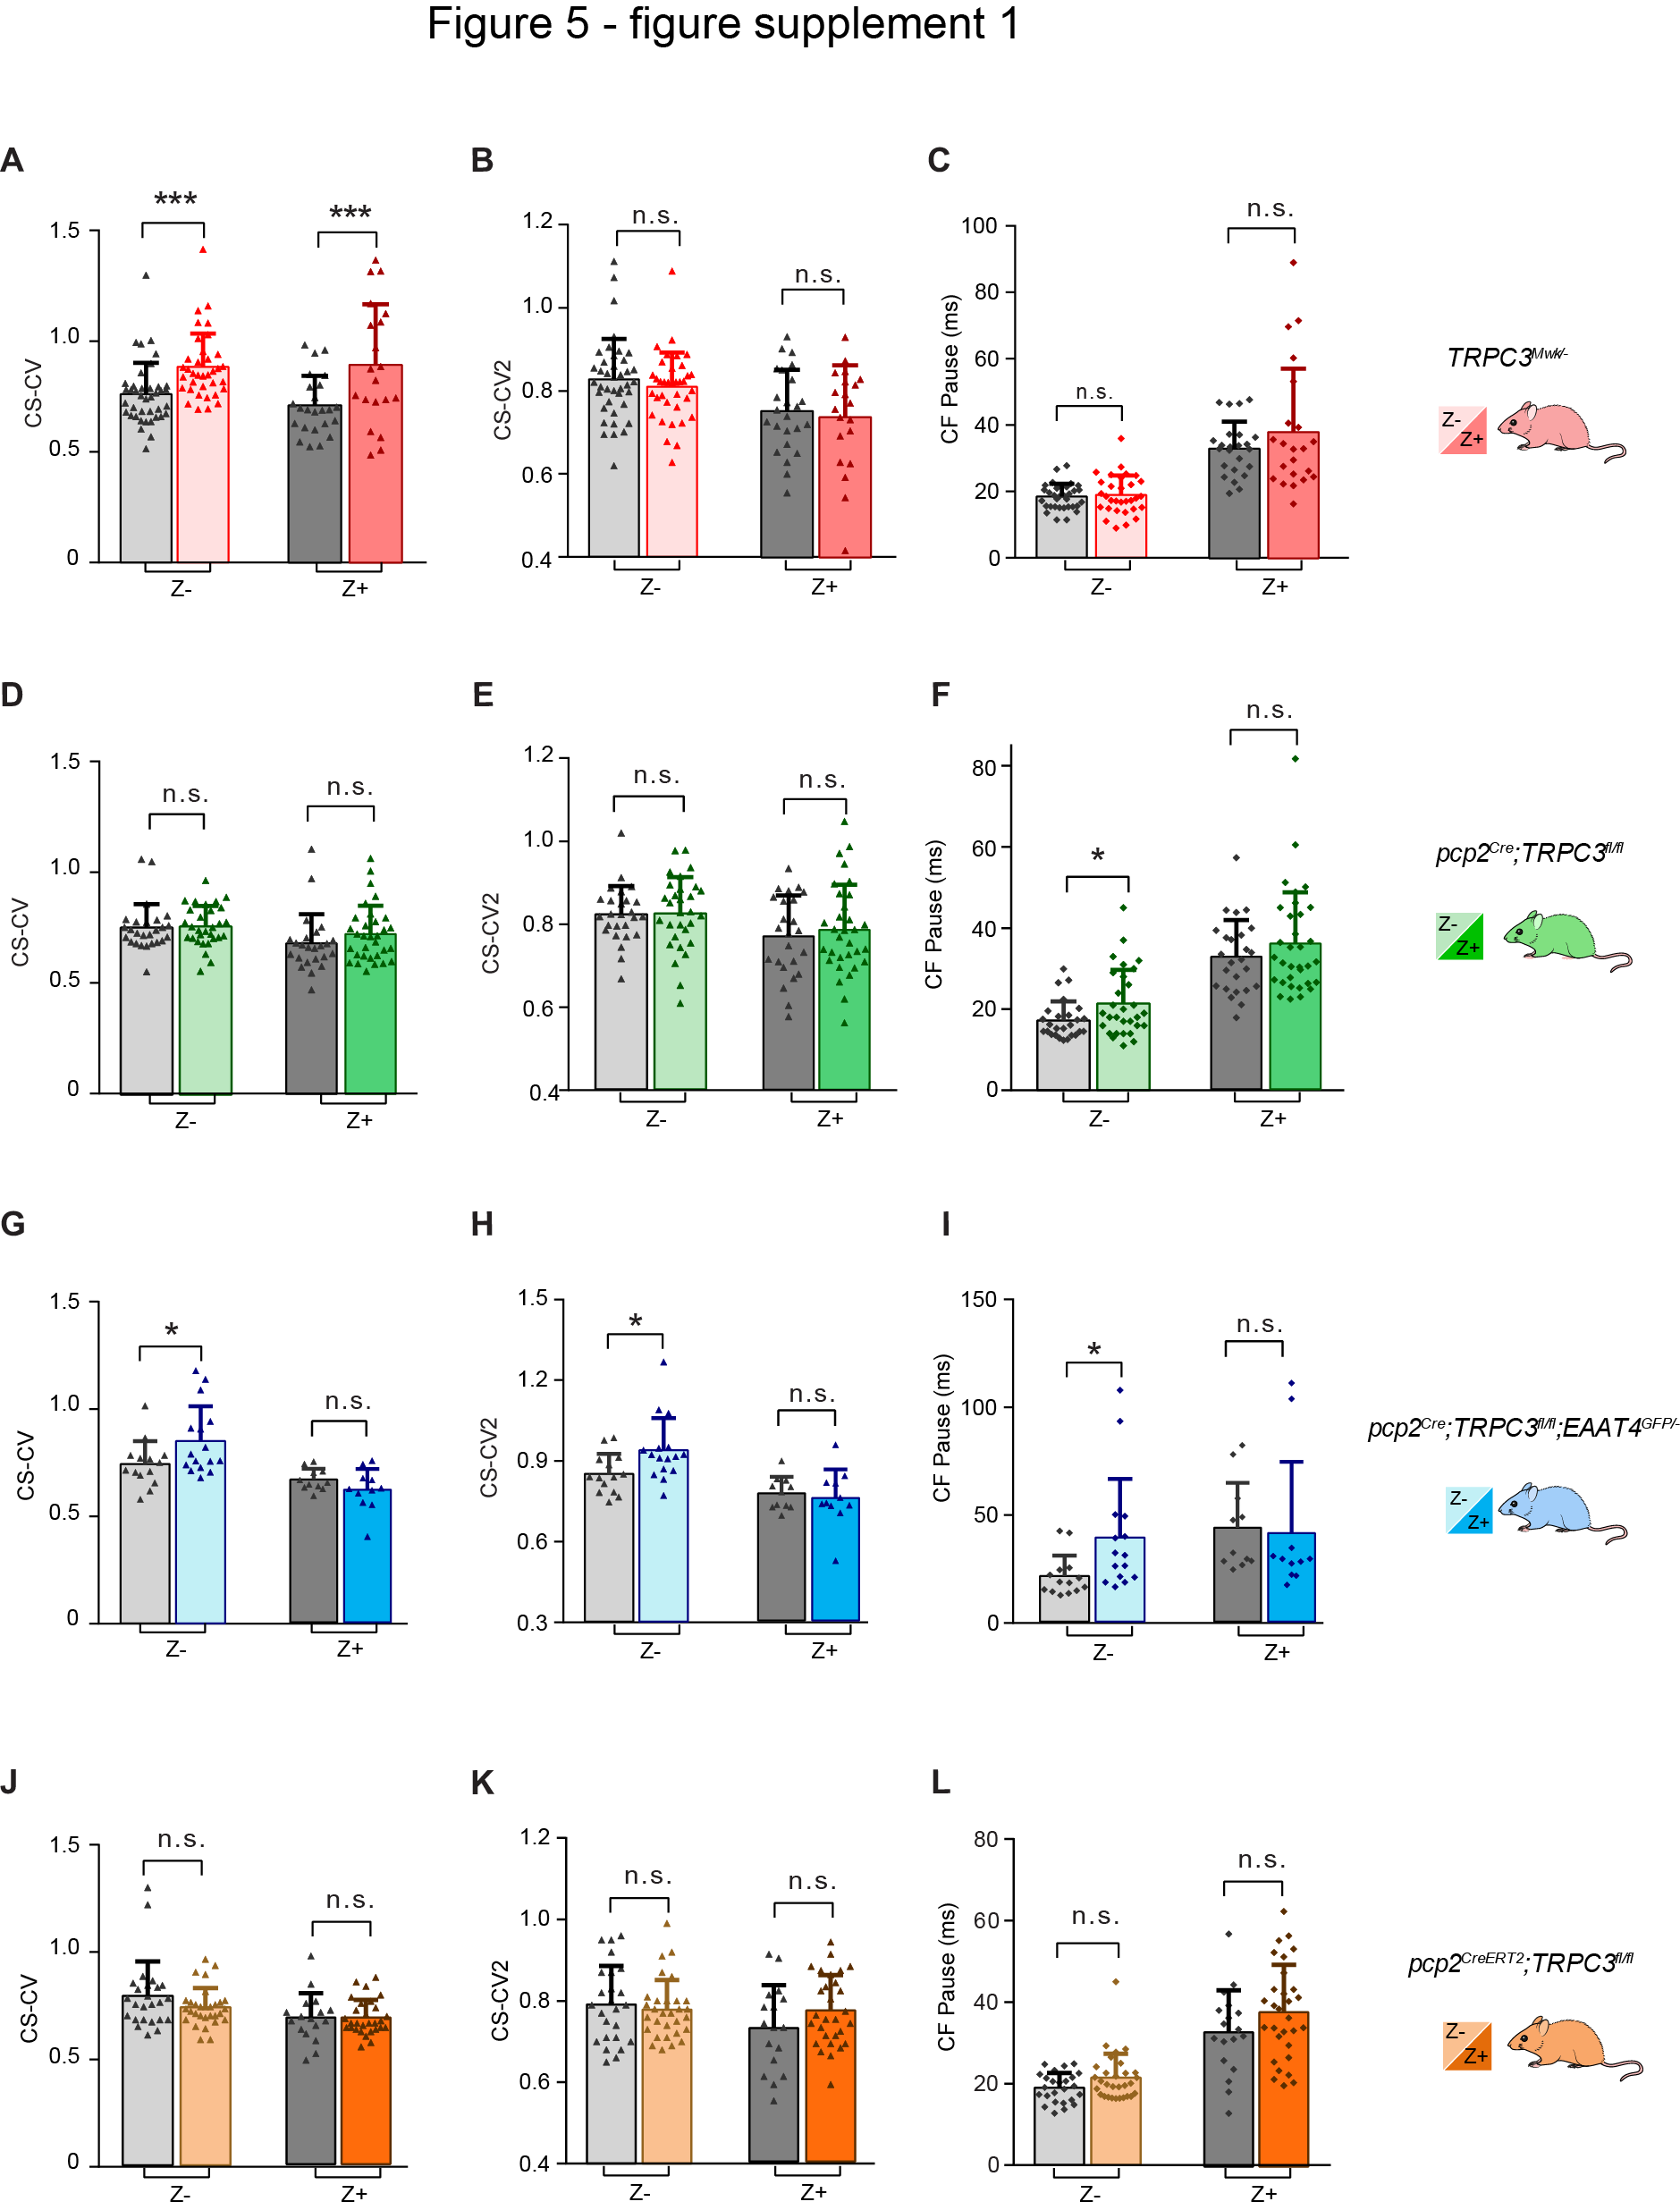

Supplement: supp [file elife-45590-supp-v1.zip › elife_poa_e45590_Figure_5_figure_supplement_1.tif]

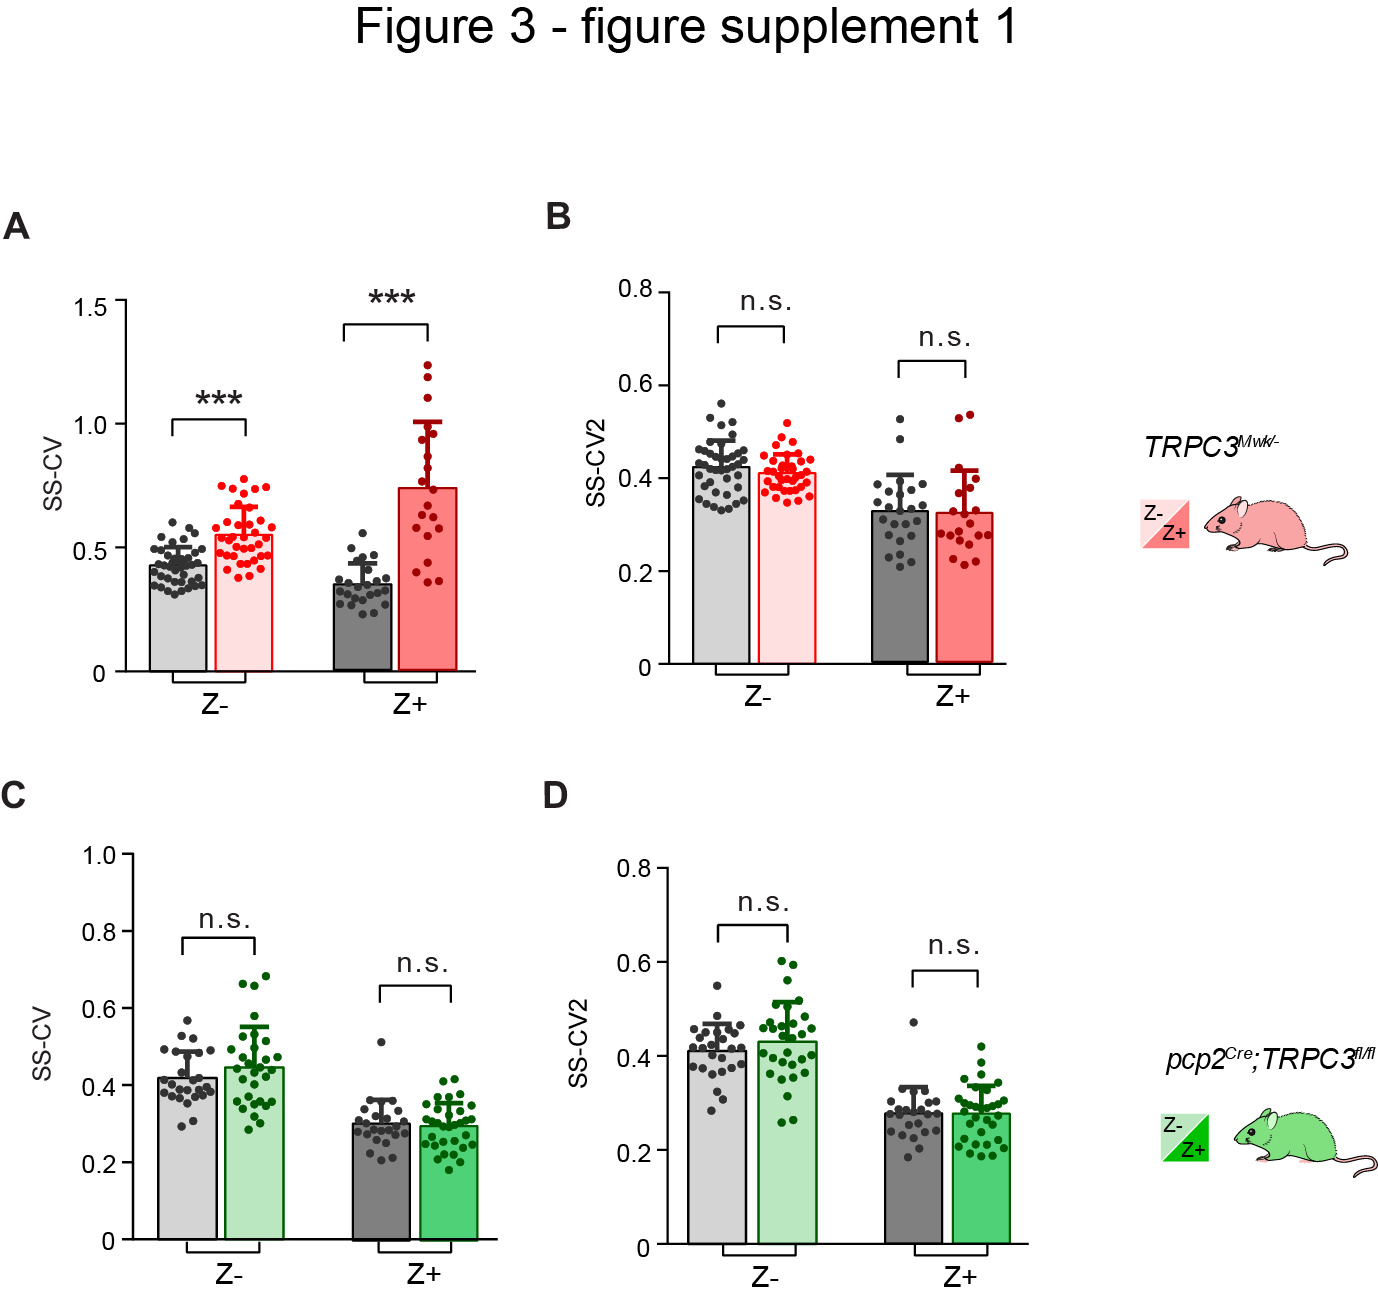

Supplement: supp [file elife-45590-supp-v1.zip › elife_poa_e45590_Figure_3_figure_supplement_1.tif]

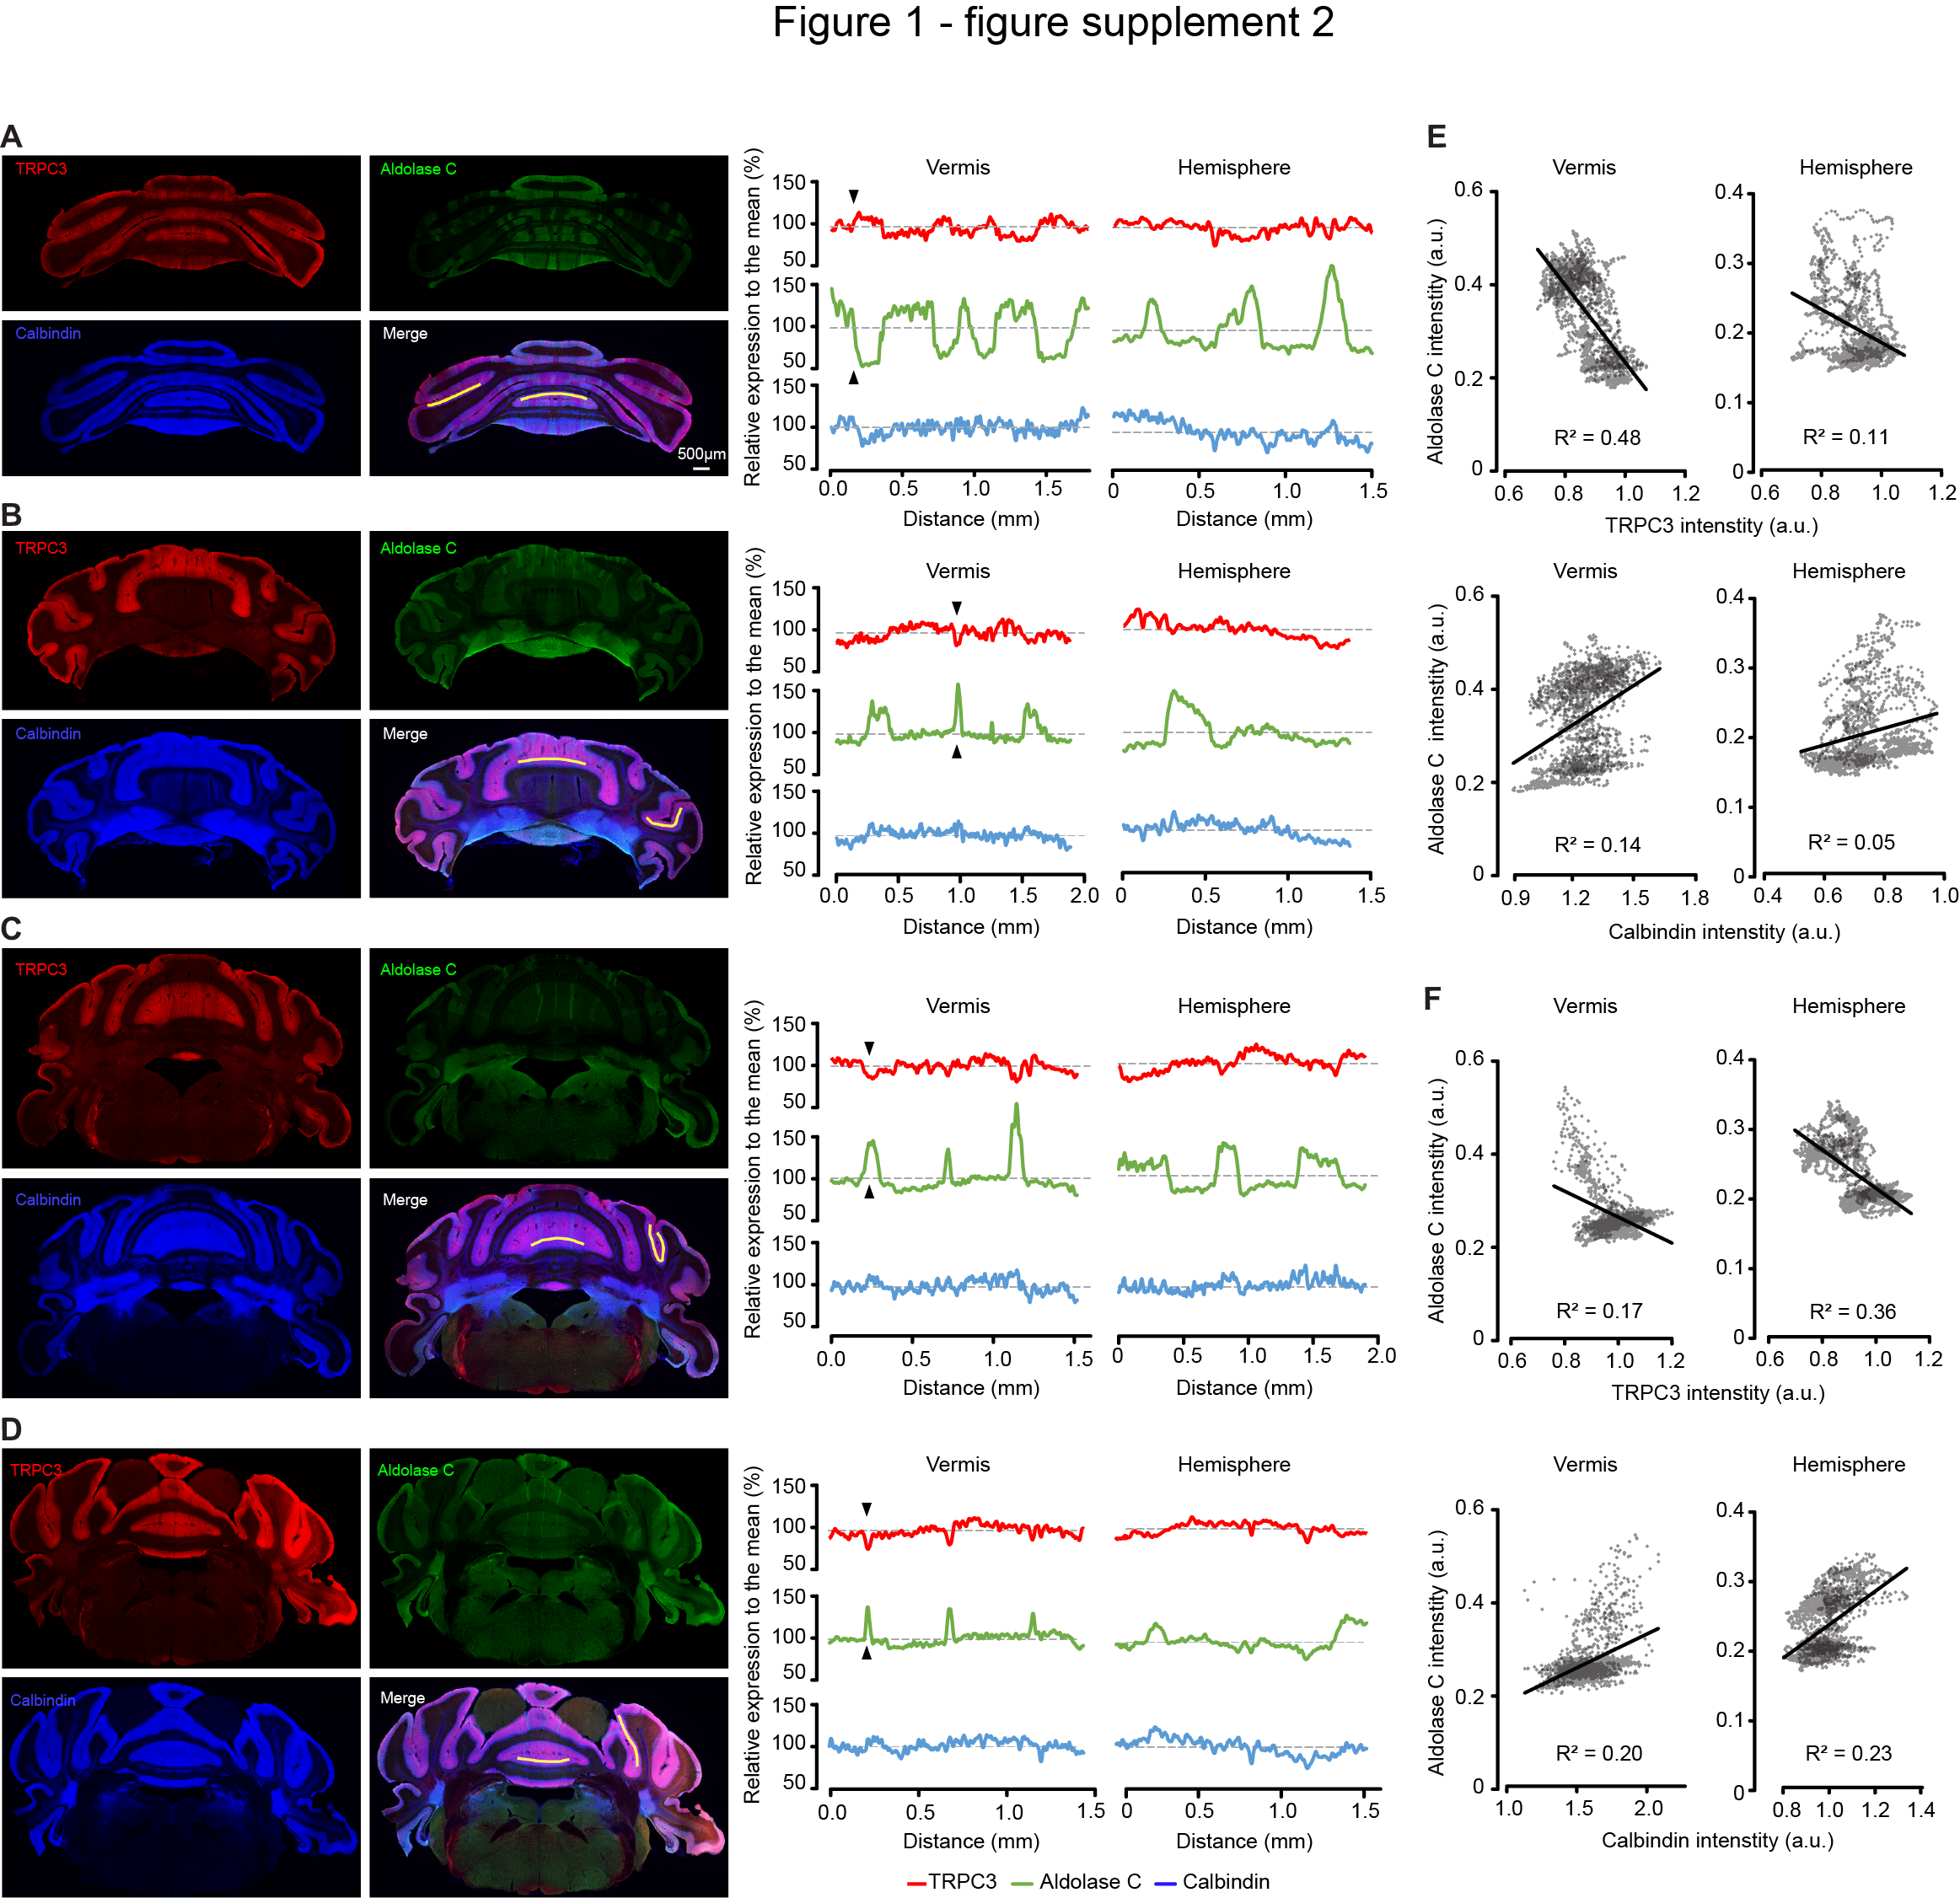

Supplement: supp [file elife-45590-supp-v1.zip › elife_poa_e45590_Figure_1_figure_supplement_2.tif]
